# Supplementary material for: Estimated projection of oral squamous cell carcinoma annual incidence from twenty years registry data: a retrospective cross-sectional study in Indonesia
Source: PeerJ journal article supplement (doi:10.7717/peerj.15911), 2023-08-29
Supplement: Data_S1_staff_kt.pdf [file Data_S1_staff_kt.pdf]

## Supplemental Data S1: Research Checklist

STROBE checklist 2007 (v4): A checklist of items to be included in reports of cross-sectional studies.

| Section/Topic                | Item # | Recommendation                                                                                                                                                                                    | Reported on page # |
|------------------------------|--------|---------------------------------------------------------------------------------------------------------------------------------------------------------------------------------------------------|--------------------|
| Title and abstract           | 1      | (a) Indicate the study's design with a commonly used term in the title or the abstract                                                                                                            | 1                  |
|                              |        | (b) Provide in the abstract an informative and balanced summary of what was done and what was found                                                                                               | 1                  |
| <b>Introduction</b>          |        |                                                                                                                                                                                                   |                    |
| Background/rationale         | 2      | Explain the scientific background and rationale for the investigation being reported                                                                                                              | 2                  |
| Objectives                   | 3      | State specific objectives, including any prespecified hypotheses                                                                                                                                  | 2                  |
| <b>Methods</b>               |        |                                                                                                                                                                                                   |                    |
| Study design                 | 4      | Present key elements of study design early in the paper                                                                                                                                           | 3                  |
| Setting                      | 5      | Describe the setting, locations, and relevant dates, including periods of recruitment, exposure, follow-up, and data collection                                                                   | 3                  |
| Participants                 | 6      | (a) Give the eligibility criteria, and the sources and methods of selection of participants                                                                                                       | 3                  |
| Variables                    | 7      | Clearly define all outcomes, exposures, predictors, potential confounders, and effect modifiers. Give diagnostic criteria, if applicable                                                          | 3                  |
| Data sources/<br>measurement | 8*     | For each variable of interest, give sources of data and details of methods of assessment (measurement). Describe comparability of assessment methods if there is more than one group              | 3-6                |
| Bias                         | 9      | Describe any efforts to address potential sources of bias                                                                                                                                         | 3, 21, and 22      |
| Study size                   | 10     | Explain how the study size was arrived at                                                                                                                                                         | 3 and 4            |
| Quantitative variables       | 11     | Explain how quantitative variables were handled in the analyses. If applicable, describe which groupings were chosen and why                                                                      | 3-6                |
| Statistical methods          | 12     | (a) Describe all statistical methods, including those used to control for confounding                                                                                                             | 3-6                |
|                              |        | (b) Describe any methods used to examine subgroups and interactions                                                                                                                               | 3-6                |
|                              |        | (c) Explain how missing data were addressed                                                                                                                                                       | 3 and 4            |
|                              |        | (d) If applicable, describe analytical methods taking account of sampling strategy                                                                                                                | 3 and 4            |
|                              |        | (e) Describe any sensitivity analyses                                                                                                                                                             | 3-6                |
| <b>Results</b>               |        |                                                                                                                                                                                                   |                    |
| Participants                 | 13*    | (a) Report numbers of individuals at each stage of study—eg numbers potentially eligible, examined for eligibility, confirmed eligible, included in the study, completing follow-up, and analysed | 3 and 7            |
|                              |        | (b) Give reasons for non-participation at each stage                                                                                                                                              | 3, 4, and 7        |
|                              |        | (c) Consider use of a flow diagram                                                                                                                                                                | 4                  |
| Descriptive data             | 14*    | (a) Give characteristics of study participants (eg demographic, clinical, social) and information on exposures and potential confounders                                                          | 8 and 12-15        |
|                              |        | (b) Indicate number of participants with missing data for each variable of interest                                                                                                               | 13 and 15          |
| Outcome data                 | 15*    | Report numbers of outcome events or summary measures                                                                                                                                              | 8, 9, and 12-15    |

|                          |    |                                                                                                                                                                                                              |                 |
|--------------------------|----|--------------------------------------------------------------------------------------------------------------------------------------------------------------------------------------------------------------|-----------------|
| Main results             | 16 | (a) Give unadjusted estimates and, if applicable, confounder-adjusted estimates and their precision (eg, 95% confidence interval). Make clear which confounders were adjusted for and why they were included | 8, 9, and 12-15 |
|                          |    | (b) Report category boundaries when continuous variables were categorized                                                                                                                                    | 8, 9, and 12-15 |
|                          |    | (c) If relevant, consider translating estimates of relative risk into absolute risk for a meaningful time period                                                                                             | N/A             |
| Other analyses           | 17 | Report other analyses done—eg analyses of subgroups and interactions, and sensitivity analyses                                                                                                               | N/A             |
| <b>Discussion</b>        |    |                                                                                                                                                                                                              |                 |
| Key results              | 18 | Summarise key results with reference to study objectives                                                                                                                                                     | 11              |
| Limitations              | 19 | Discuss limitations of the study, taking into account sources of potential bias or imprecision. Discuss both direction and magnitude of any potential bias                                                   | 22              |
| Interpretation           | 20 | Give a cautious overall interpretation of results considering objectives, limitations, multiplicity of analyses, results from similar studies, and other relevant evidence                                   | 11-22           |
| Generalisability         | 21 | Discuss the generalisability (external validity) of the study results                                                                                                                                        | 23              |
| <b>Other information</b> |    |                                                                                                                                                                                                              |                 |
| Funding                  | 22 | Give the source of funding and the role of the funders for the present study and, if applicable, for the original study on which the present article is based                                                | 23              |

\*Give information separately for cases and controls in case-control studies and, if applicable, for exposed and unexposed groups in cohort and cross-sectional studies.
