# Supplementary material for: Estimated projection of oral squamous cell carcinoma annual incidence from twenty years registry data: a retrospective cross-sectional study in Indonesia
Source: PeerJ journal article supplement (doi:10.7717/peerj.15911), 2023-08-29
Supplement: Data_S3.pdf [file Data_S3.pdf]

## Supplemental Data S3: Best-Fitted Model for Estimated Projection

In-depth analysis and validation of the generated model used to estimate the projection of oral squamous cell carcinoma (OSCC) cases over the next five years, employing linear/non-linear regression analysis.

### a. Regression Model for Total OSCC Cases

#### 1). Curve options

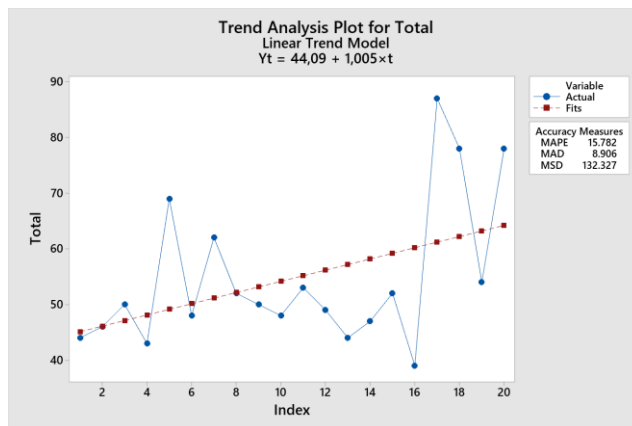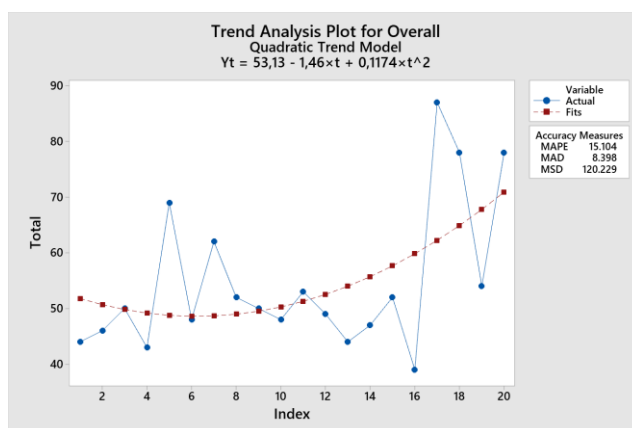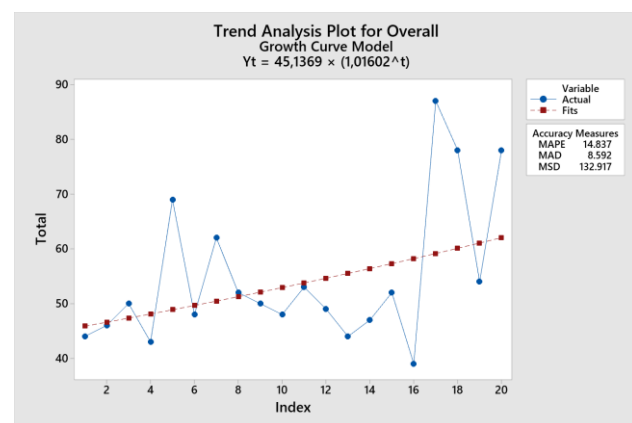

| Model                   | Automatic Fitted-Curve                              | Accuracy Measurements |              |                |
|-------------------------|-----------------------------------------------------|-----------------------|--------------|----------------|
|                         |                                                     | MAPE                  | MAD          | MSD            |
| Linear model            | $Y_t = 44.09 + 1.005t$                              | 15.782                | 8.906        | 132.327        |
| <b>Quadratic model*</b> | <b><math>Y_t = 53.13 - 1.46t + 0.1174t^2</math></b> | 15.104                | <b>8.398</b> | <b>120.229</b> |
| Growth curve model      | $Y_t = 45.1369 \times (1.01602^t)$                  | <b>14.837</b>         | 8.592        | 132.917        |

\*The best-fitted model is the one that has the lowest value for three parameters (MAPE, MAD, and MSD), or at least for two parameters out of three, or at least having the lowest value for MAPE.

## 2). Residual analysis, goodness-of-fit, and homoscedasticity for the Quadratic model

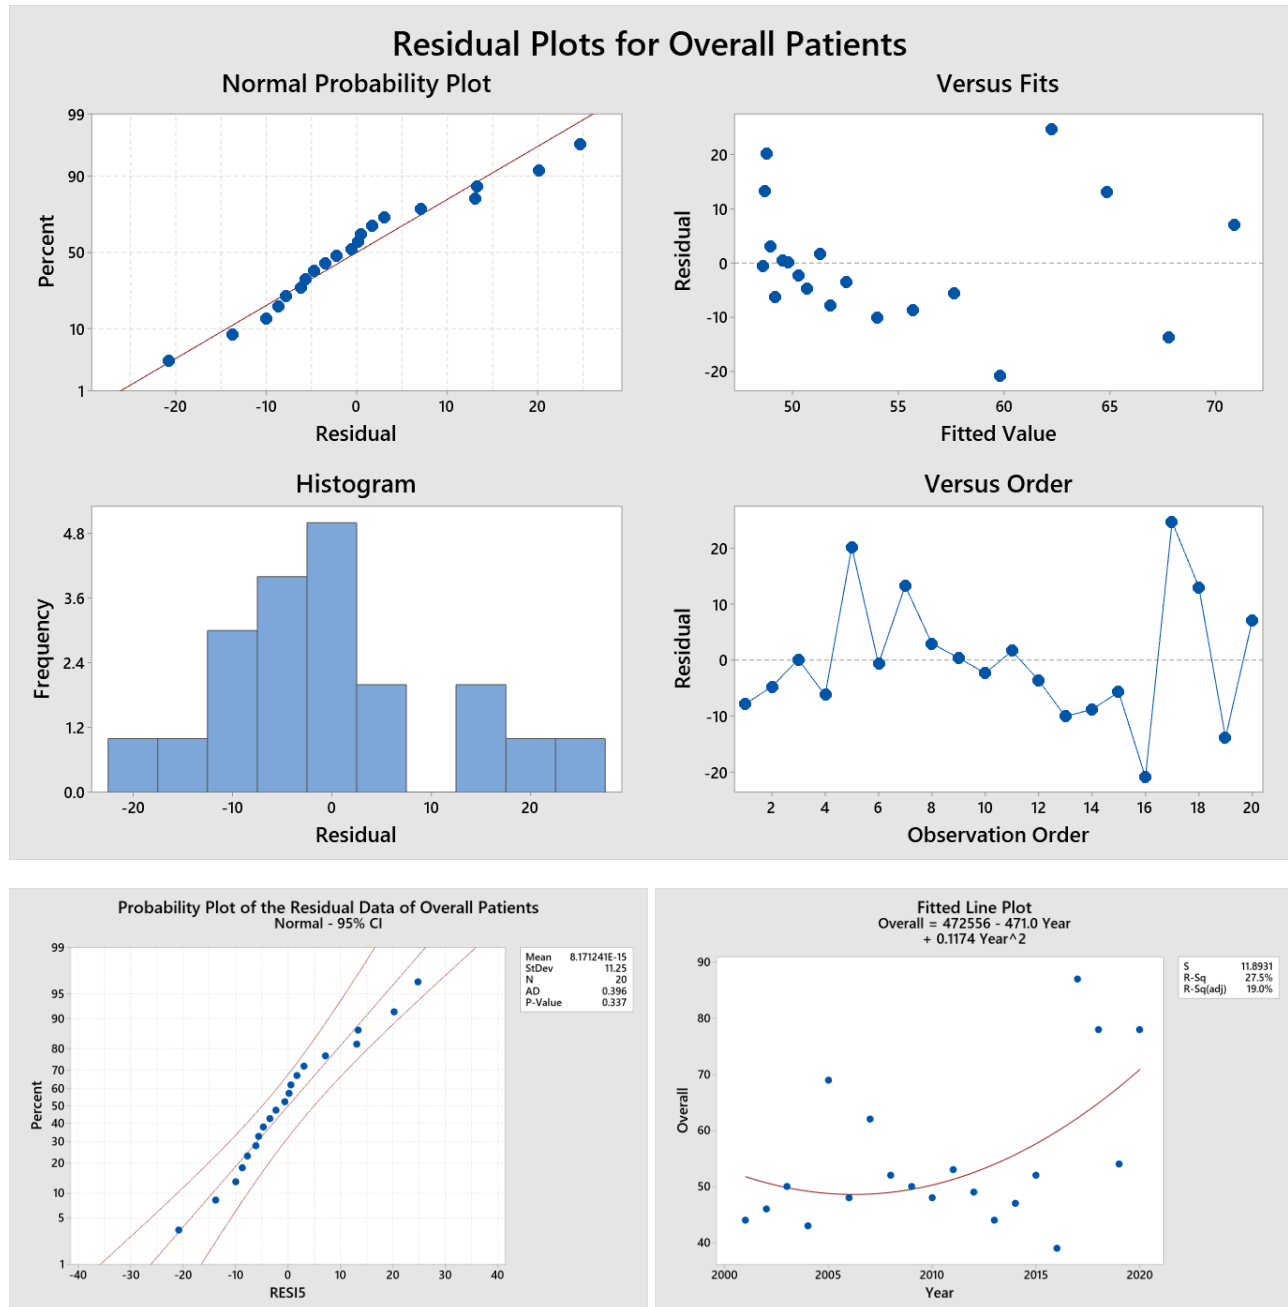

### Interpretation:

- The normality test for the residuals yielded a p-value of **0.337**, suggesting a close alignment with the red line (“zero line” or “residuals mean line” or “identity line”) and indicating a normal distribution.
- The R-square value for the Quadratic model is **27.5%**, indicating a reasonable fit of the regression model to the data.
- The plot of fitted values versus residuals shows consistent variance across all fitted values, suggesting the assumption of homoscedasticity is likely satisfied.

### 3). Autocorrelaion test

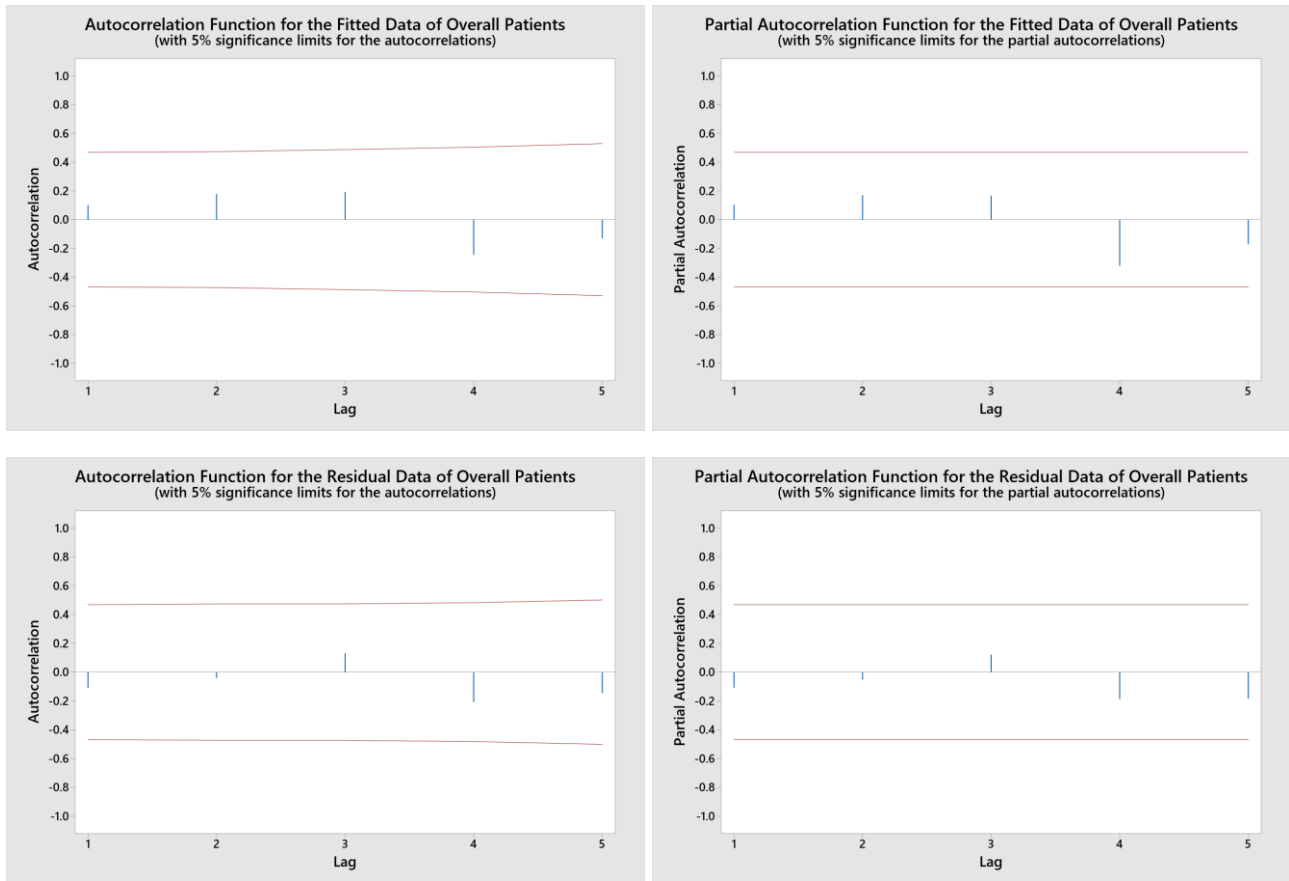

#### **Interpretation:**

The fitted and residual data of **overall patients** show a correlation **near zero**, indicating stationarity, independence, and absence of systematic patterns. This suggests that the model effectively captures underlying data patterns and produces accurate forecasts.

### 4). The results of the significance test for the slope of the Quadratic curve estimation

| ANOVA      |                |    |             |       |              |
|------------|----------------|----|-------------|-------|--------------|
|            | Sum of Squares | df | Mean Square | F     | Sig.         |
| Regression | 673.048        | 1  | 673.048     | 4.579 | <b>0.046</b> |
| Residual   | 2645.502       | 18 | 146.972     |       |              |
| Total      | 3318.550       | 19 |             |       |              |

The independent variable is the Year.

### 5). Forecasting the number of cases for the next five years using the Quadratic model

| Year         | Forecasted Cases |
|--------------|------------------|
| 2021         | 74.2447          |
| 2022         | 77.8327          |
| 2023         | 81.6555          |
| 2024         | 85.7130          |
| 2025         | 90.0054          |
| <b>Mean</b>  | 81.8903          |
| <b>Total</b> | 491.3416         |

**b. Regression Model for OSCC Cases in Young Patients (≤45 years old)**

**1). Curve options**

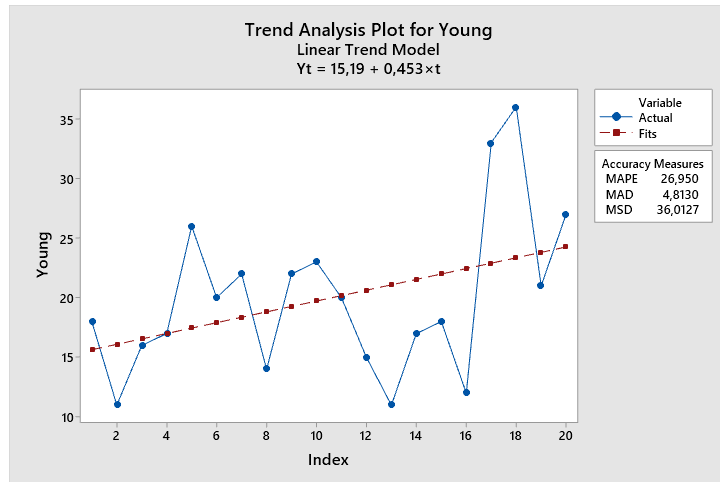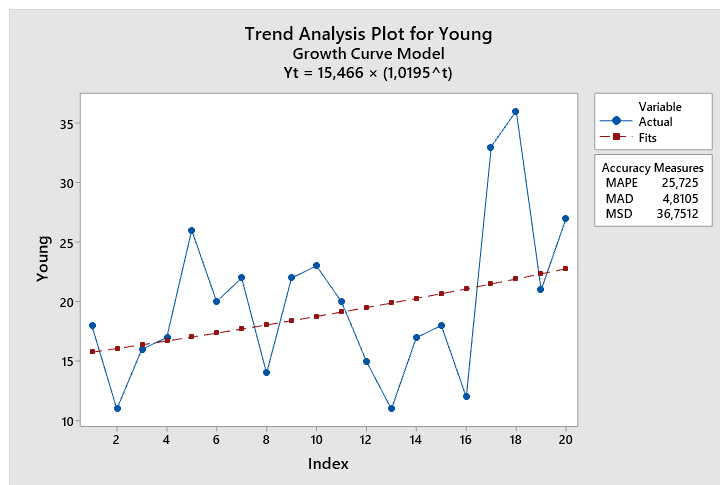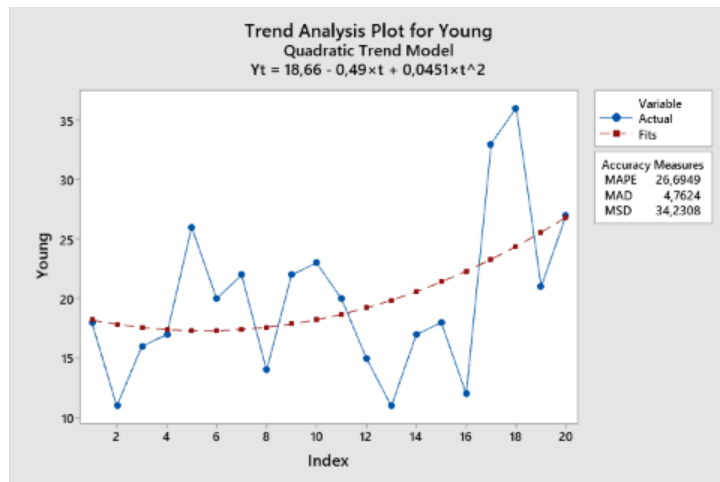

| Model                   | Automatic Fitted-Curve                              | Accuracy Measurements |               |                |
|-------------------------|-----------------------------------------------------|-----------------------|---------------|----------------|
|                         |                                                     | MAPE                  | MAD           | MSD            |
| Linear model            | $Y_t = 15,19 + 0,453t$                              | 26.9506               | 4.8130        | 36.0127        |
| <b>Quadratic model*</b> | <b><math>Y_t = 18,66 - 0,49t + 0,0451t^2</math></b> | <b>26.6949</b>        | <b>4.7624</b> | <b>34.2308</b> |
| Growth curve            | $Y_t = 15,466 \times (1,0195^t)$                    | 25.7255               | 4.8105        | 36.7512        |

\*The best-fitted model is the one that has the lowest value for three parameters (MAPE, MAD, and MSD), or at least for two parameters out of three, or at least having the lowest value for MAPE.

## 2). Residual analysis, goodness-of-fit, and homoscedasticity for the Quadratic model

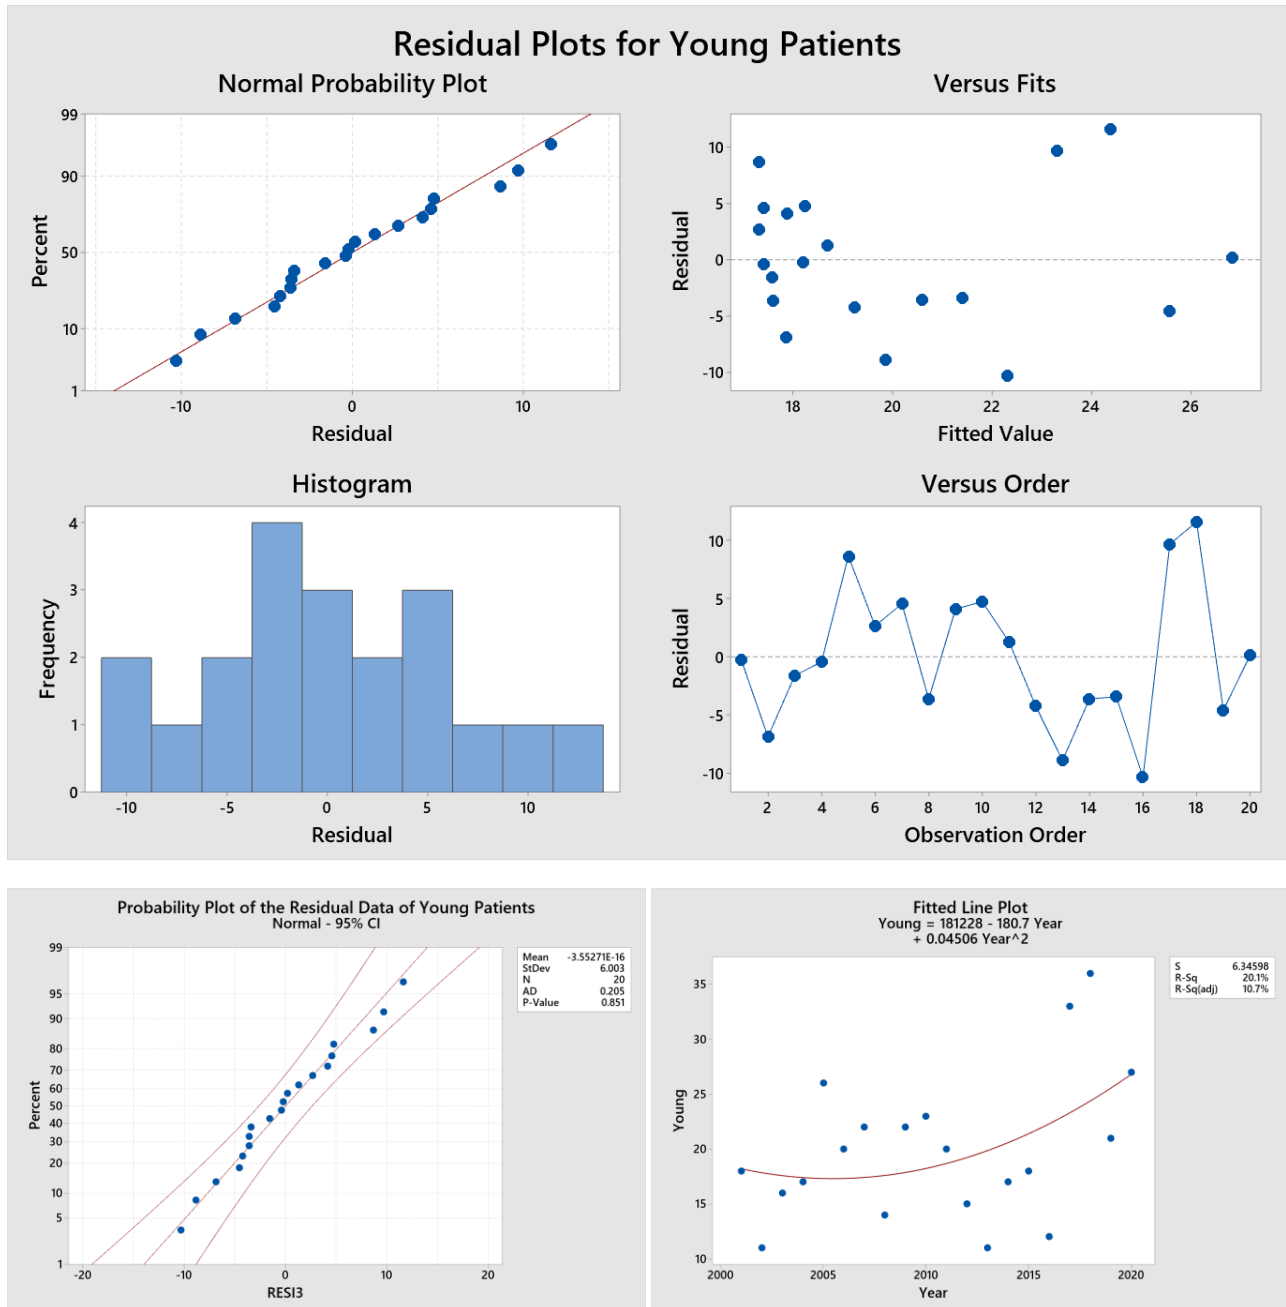

### Interpretation:

- The normality test for the residuals yielded a p-value of **0.851**, suggesting a close alignment with the red line (“zero line” or “residuals mean line” or “identity line”) and indicating a normal distribution.
- The R-square value for the Quadratic model is **20.1%**, indicating a reasonable fit of the regression model to the data.
- The plot of fitted values versus residuals shows consistent variance across all fitted values, suggesting the assumption of homoscedasticity is likely satisfied.

### 3). Autocorrelaion test

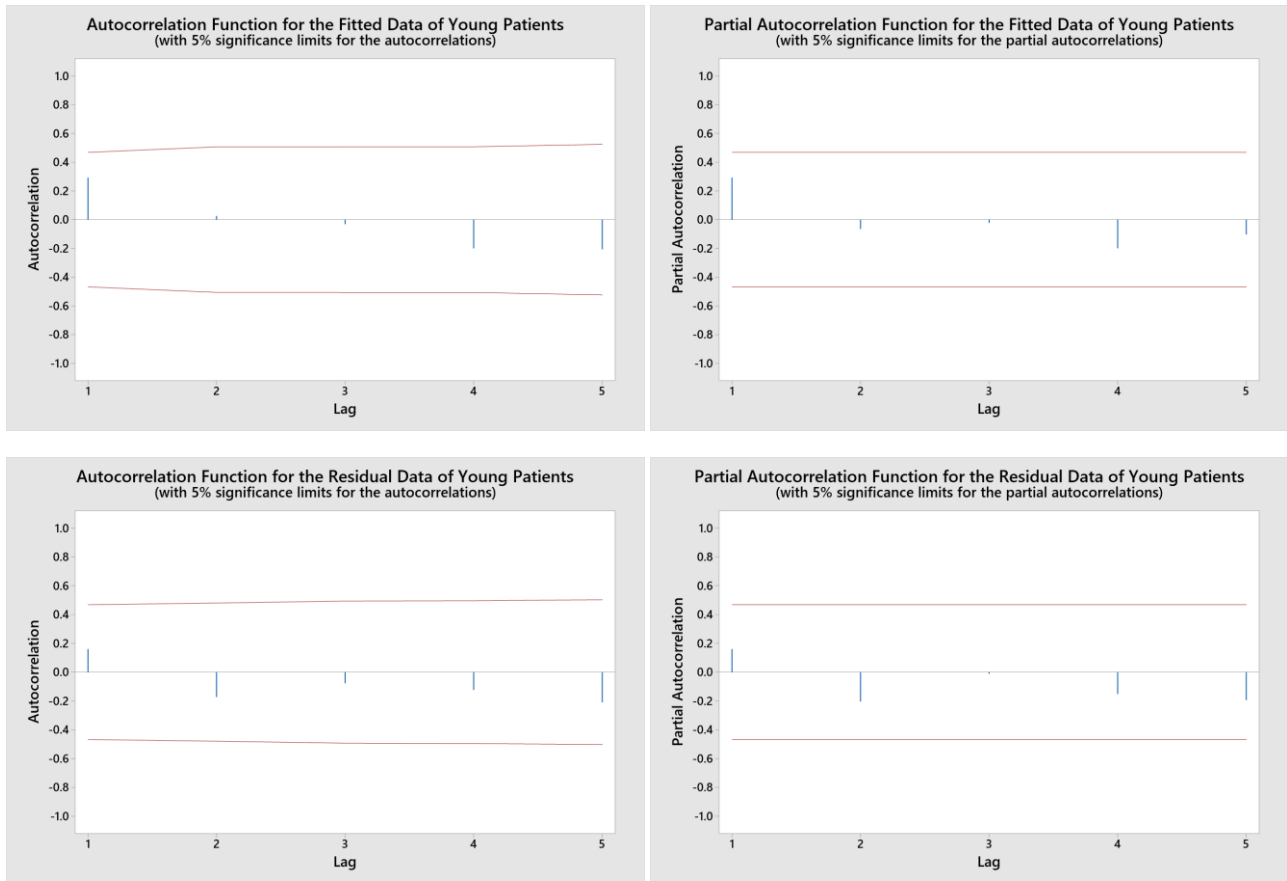

#### **Interpretation:**

The fitted and residual data of **young patients** show a correlation **near zero**, indicating stationarity, independence, and absence of systematic patterns. This suggests that the model effectively captures underlying data patterns and produces accurate forecasts.

### 4). The results of the significance test for the slope of the Quadratic curve estimation

| ANOVA      |                |    |             |       |       |
|------------|----------------|----|-------------|-------|-------|
|            | Sum of Squares | df | Mean Square | F     | Sig.  |
| Regression | 136.873        | 1  | 136.873     | 3.421 | 0.081 |
| Residual   | 720.077        | 18 | 40.004      |       |       |
| Total      | 856.950        | 19 |             |       |       |

The independent variable is the Year.

### 5). Forecasting the number of cases for the next five years using the Quadratic model

| Year         | Forecasted Cases |
|--------------|------------------|
| 2021         | 28.1798          |
| 2022         | 29.6244          |
| 2023         | 31.1592          |
| 2024         | 32.7840          |
| 2025         | 34.4989          |
| <b>Mean</b>  | <b>31.2493</b>   |
| <b>Total</b> | <b>187.4956</b>  |

### c. Regression Model for OSCC Cases in Old Patients (>45 years old)

#### 1). Curve options

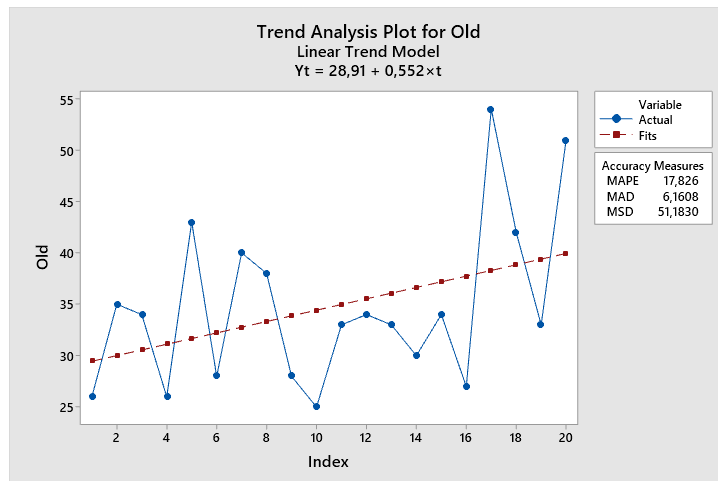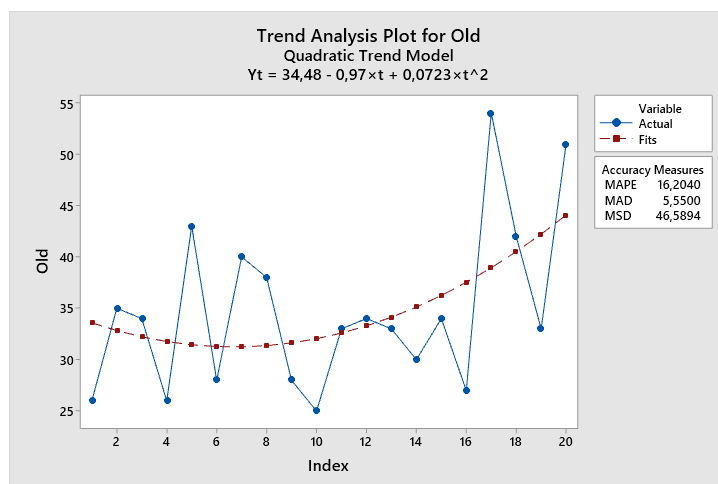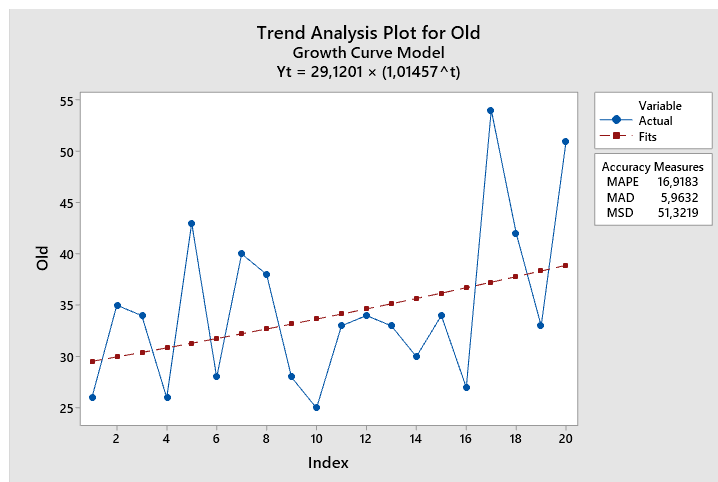

| Model                   | Automatic Fitted-Curve                              | Accuracy Measurements |               |                |
|-------------------------|-----------------------------------------------------|-----------------------|---------------|----------------|
|                         |                                                     | MAPE                  | MAD           | MSD            |
| Linear model            | $Y_t = 28.91 + 0.552t$                              | 17.8266               | 6.1608        | 51.1830        |
| <b>Quadratic model*</b> | <b><math>Y_t = 34.48 - 0.97t + 0.0723t^2</math></b> | <b>16.2040</b>        | <b>5.5500</b> | <b>46.5894</b> |
| Growth curve model      | $Y_t = 29.1201 \times (1.01457^t)$                  | 16.9183               | 5.9632        | 51.3219        |

\*The best-fitted model is the one that has the lowest value for three parameters (MAPE, MAD, and MSD), or at least for two parameters out of three, or at least having the lowest value for MAPE.

## 2). Residual analysis, goodness-of-fit, and homoscedasticity for the Quadratic model

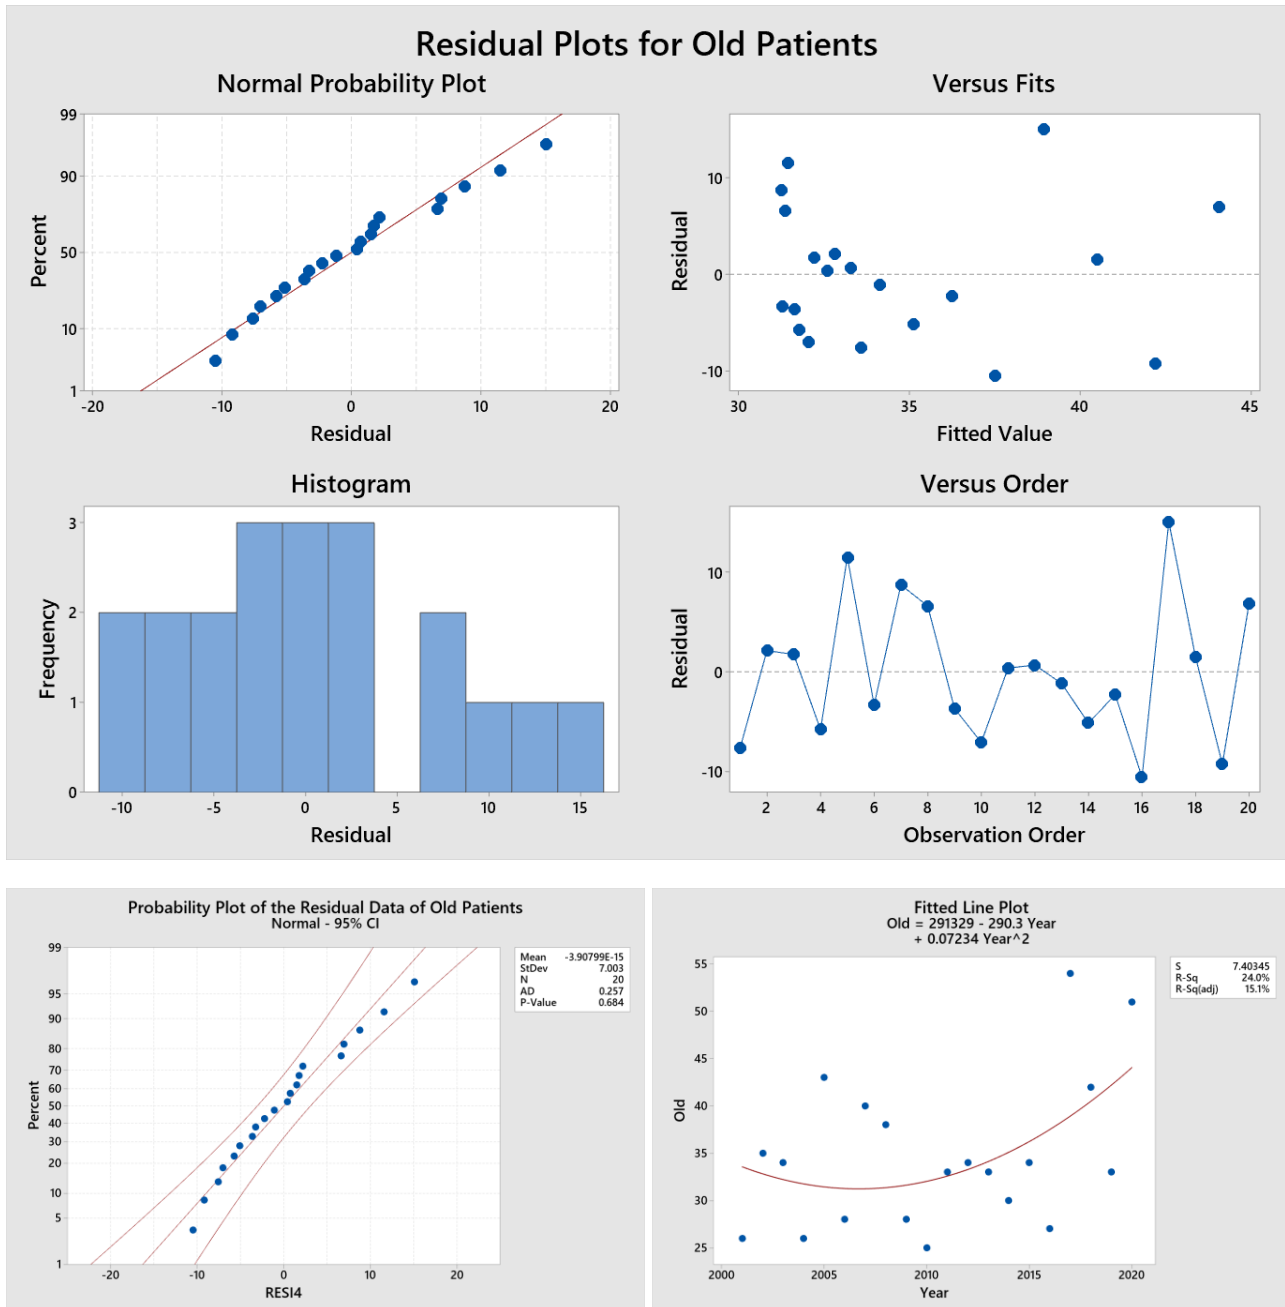

### Interpretation:

- The normality test for the residuals yielded a p-value of **0.684**, suggesting a close alignment with the red line (“zero line” or “residuals mean line” or “identity line”) and indicating a normal distribution.
- The R-square value for the Quadratic model is **24.0%**, indicating a reasonable fit of the regression model to the data.
- The plot of fitted values versus residuals shows consistent variance across all fitted values, suggesting the assumption of homoscedasticity is likely satisfied.



### 3). Autocorrelaion test

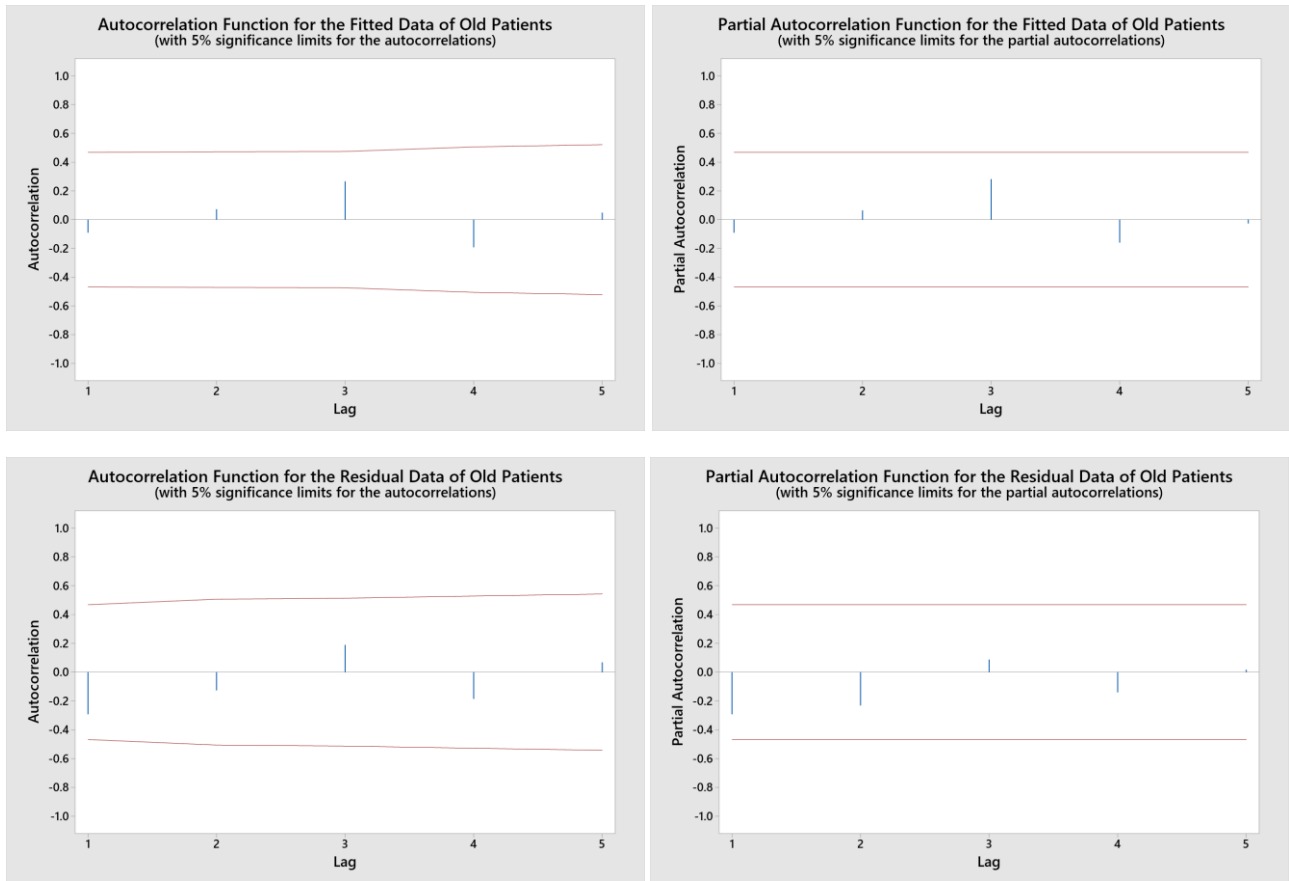

#### Interpretation:

The fitted and residual data of **old patients** show a correlation **near zero**, indicating stationarity, independence, and absence of systematic patterns. This suggests that the model effectively captures underlying data patterns and produces accurate forecasts.

### 4). The results of the significance test for the slope of the Quadratic curve estimation

| ANOVA      |                |    |             |       |       |
|------------|----------------|----|-------------|-------|-------|
|            | Sum of Squares | df | Mean Square | F     | Sig.  |
| Regression | 202.888        | 1  | 202.888     | 3.569 | 0.075 |
| Residual   | 1023.312       | 18 | 56.851      |       |       |
| Total      | 1226.200       | 19 |             |       |       |

The independent variable is the Year.

### 5). Forecasting the number of cases for the next five years using the Quadratic model

| Year         | Forecasted Cases |
|--------------|------------------|
| 2021         | 46.0649          |
| 2022         | 48.2083          |
| 2023         | 50.4963          |
| 2024         | 52.9290          |
| 2025         | 55.5064          |
| <b>Mean</b>  | 50.6410          |
| <b>Total</b> | 303.8459         |

### d. Regression Model for OSCC Cases in Male Patients

#### 1). Curve options

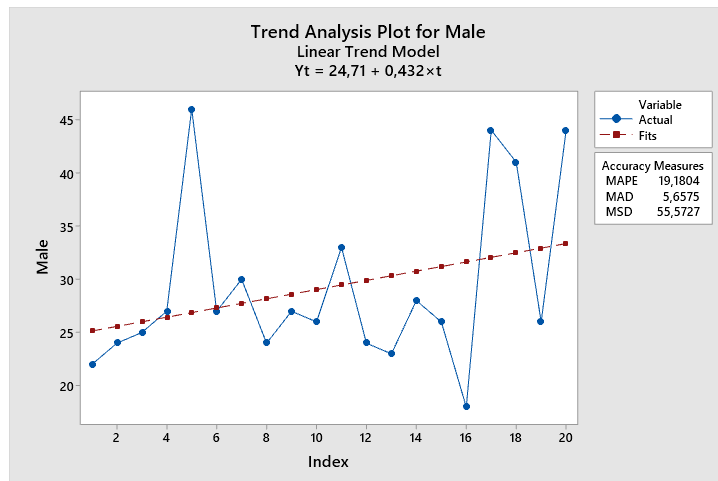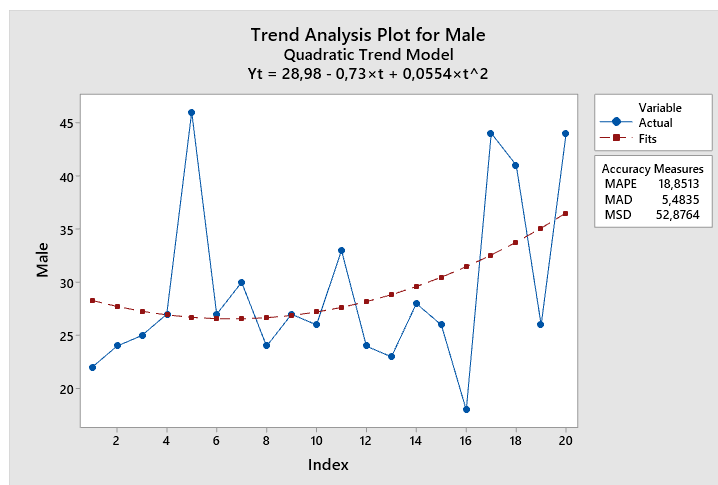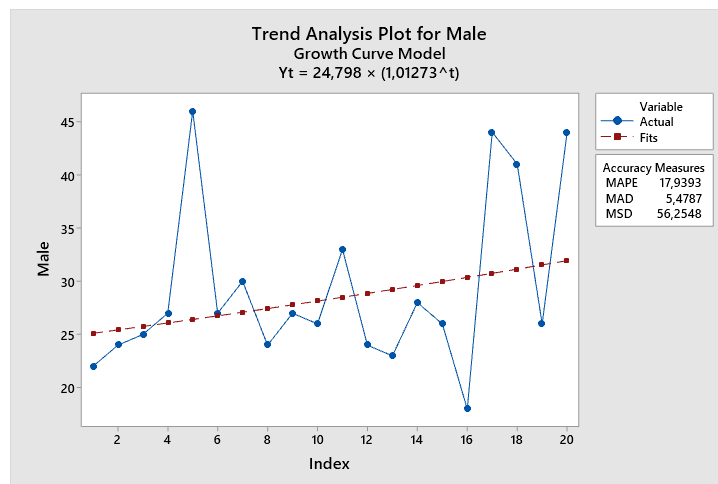

| Model                   | Automatic Fitted-Curve                              | Accuracy Measurements |               |                |
|-------------------------|-----------------------------------------------------|-----------------------|---------------|----------------|
|                         |                                                     | MAPE                  | MAD           | MSD            |
| Linear model            | $Y_t = 24.71 + 0.432t$                              | 19.1804               | 5.6575        | 55.5727        |
| <b>Quadratic model*</b> | <b><math>Y_t = 28.98 - 0.73t + 0.0554t^2</math></b> | <b>18.8513</b>        | <b>5.4835</b> | <b>52.8764</b> |
| Growth curve model      | $Y_t = 24.798 \times (1.01273^t)$                   | 17.9393               | 5.4787        | 56.2548        |

\*The best-fitted model is the one that has the lowest value for three parameters (MAPE, MAD, and MSD), or at least for two parameters out of three, or at least having the lowest value for MAPE.

## 2). Residual analysis, goodness-of-fit, and homoscedasticity for the Quadratic model

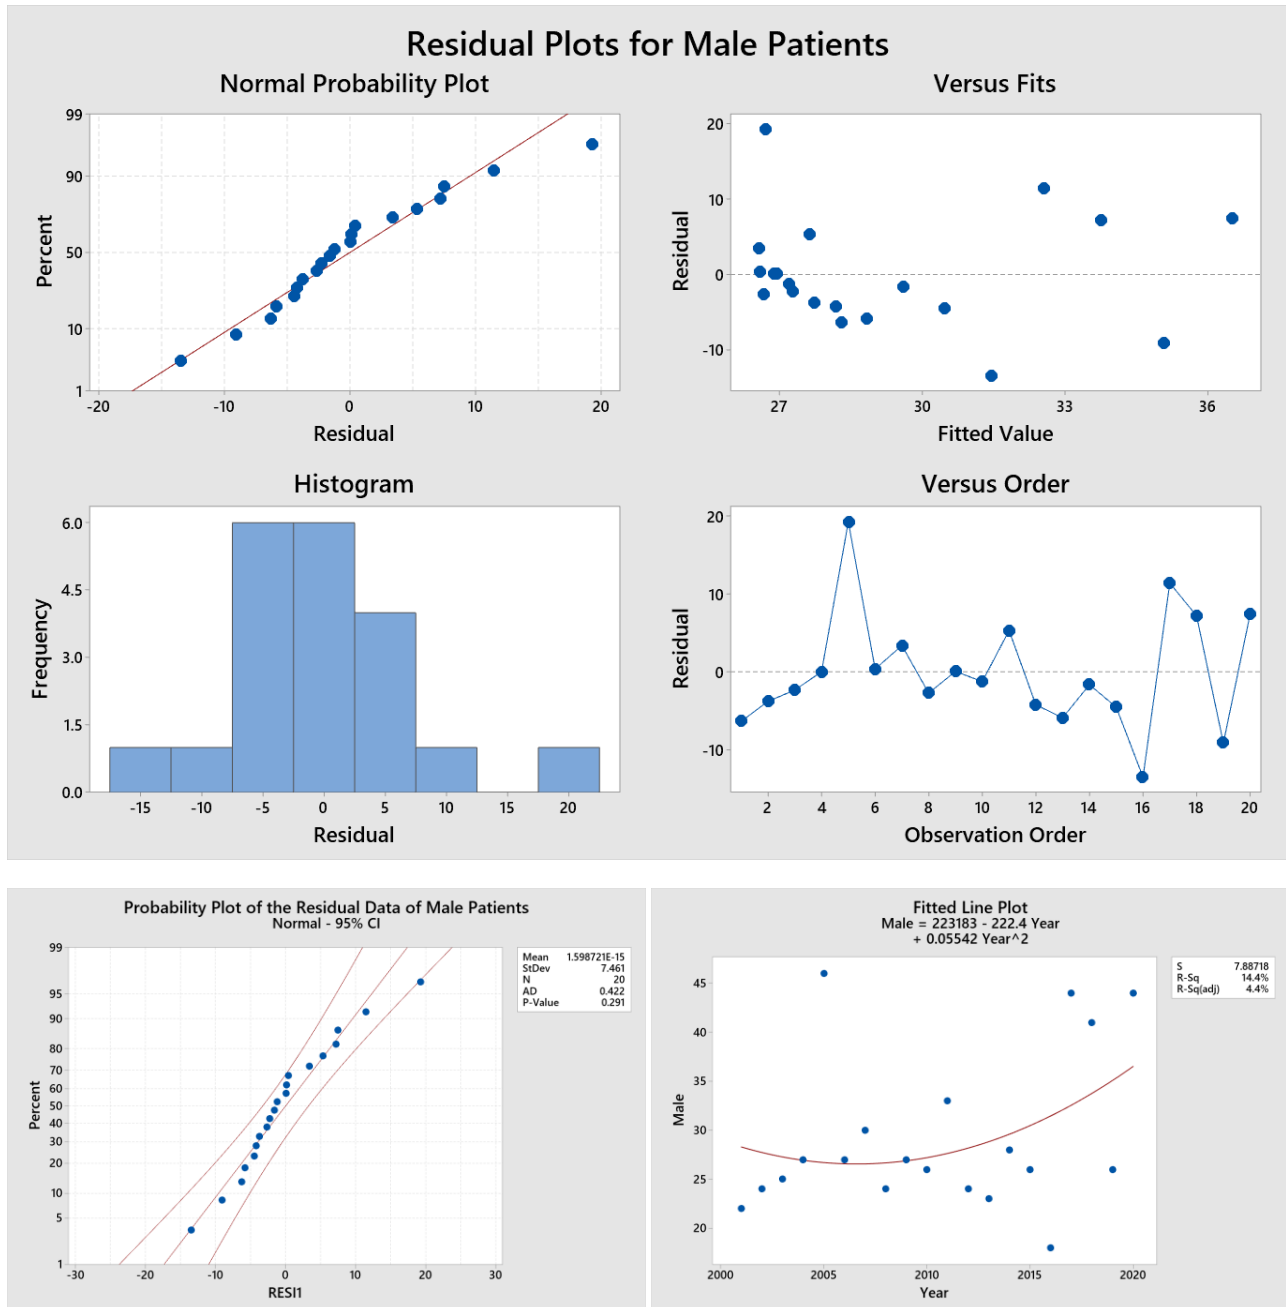

### Interpretation:

- The normality test for the residuals yielded a p-value of **0.291**, suggesting a close alignment with the red line (“zero line” or “residuals mean line” or “identity line”) and indicating a normal distribution.
- The R-square value for the Quadratic model is **14.4%**, indicating a reasonable fit of the regression model to the data.
- The plot of fitted values versus residuals shows consistent variance across all fitted values, suggesting the assumption of homoscedasticity is likely satisfied.

### 3). Autocorrelaion test

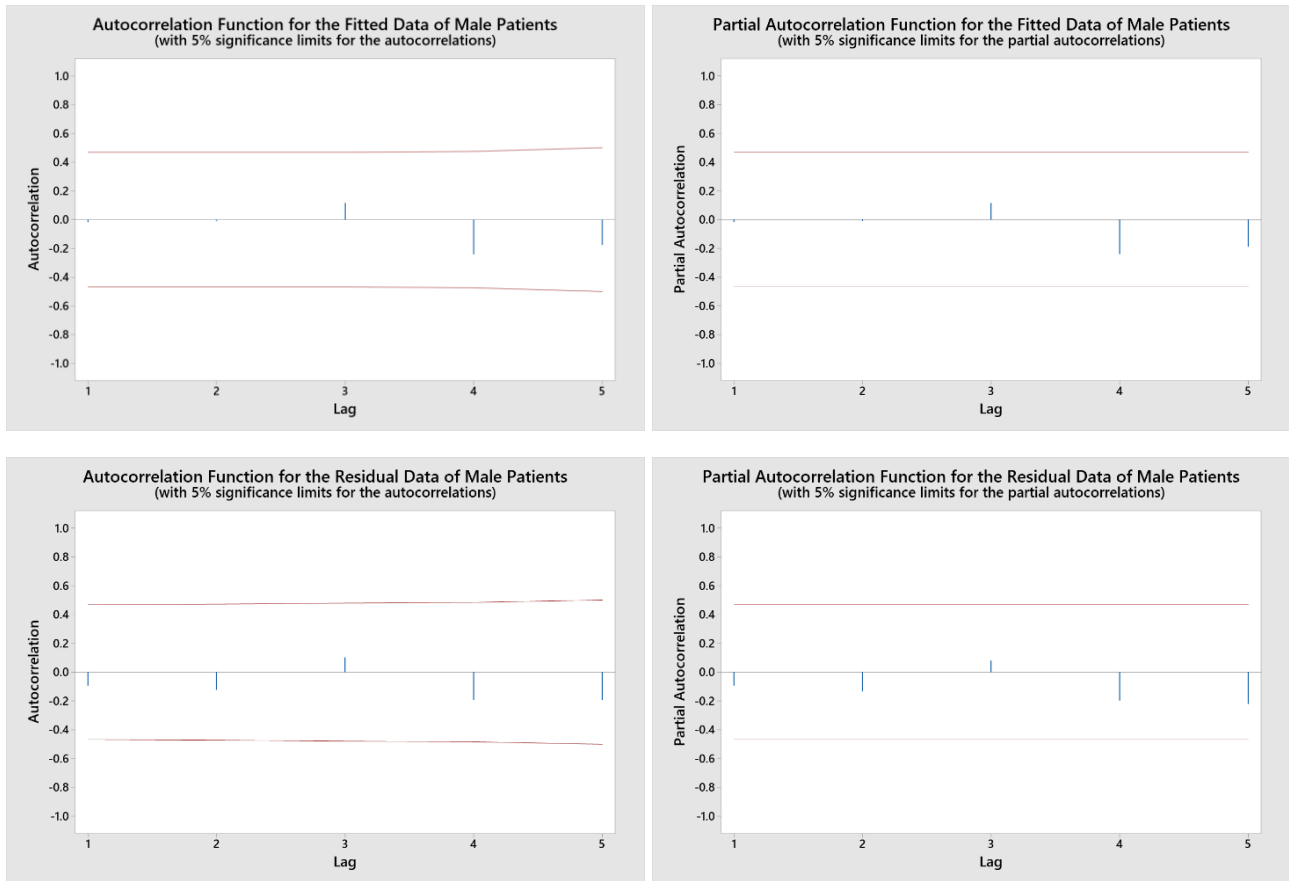

#### **Interpretation:**

The fitted and residual data of **male patients** show a correlation **near zero**, indicating stationarity, independence, and absence of systematic patterns. This suggests that the model effectively captures underlying data patterns and produces accurate forecasts.

### 4). The results of the significance test for the slope of the Quadratic curve estimation

| ANOVA      |                |    |             |       |       |
|------------|----------------|----|-------------|-------|-------|
|            | Sum of Squares | df | Mean Square | F     | Sig.  |
| Regression | 124.504        | 1  | 124.504     | 2.017 | 0.173 |
| Residual   | 1111.246       | 18 | 61.736      |       |       |
| Total      | 1235.750       | 19 |             |       |       |

The independent variable is the Year.

### 5). Forecasting the number of cases for the next five years using the Quadratic model

| Year         | Forecasted Cases |
|--------------|------------------|
| 2021         | 38.0570          |
| 2022         | 39.7086          |
| 2023         | 41.4711          |
| 2024         | 43.3444          |
| 2025         | 45.3286          |
| <b>Mean</b>  | 41.5819          |
| <b>Total</b> | 249.4916         |

### e. Regression Model for OSCC Cases in Female Patients

#### 1). Curve options

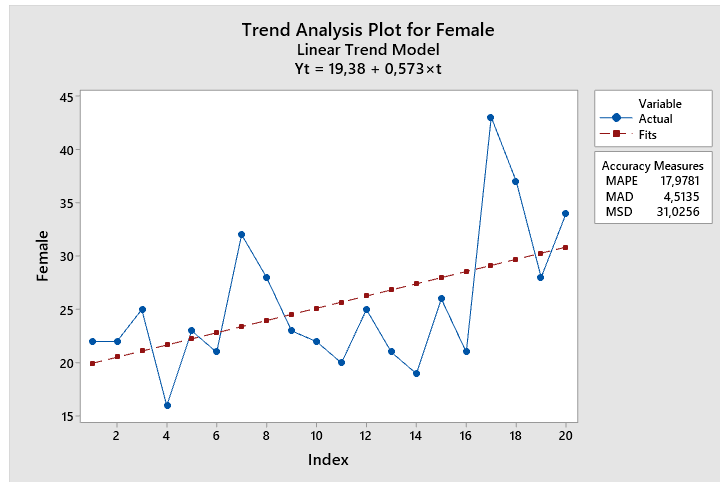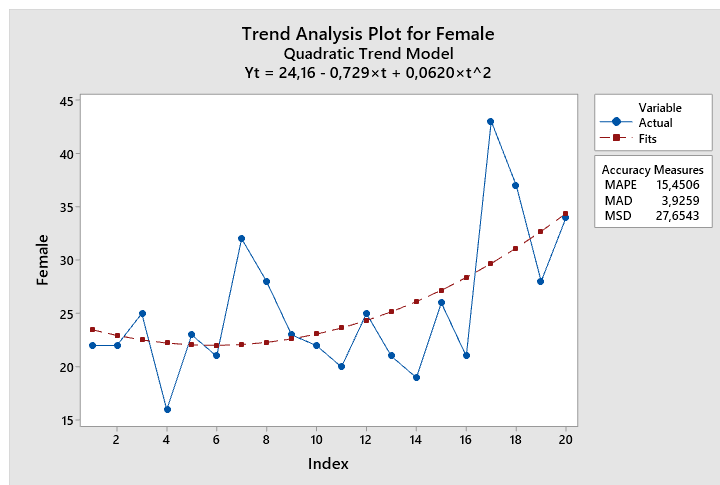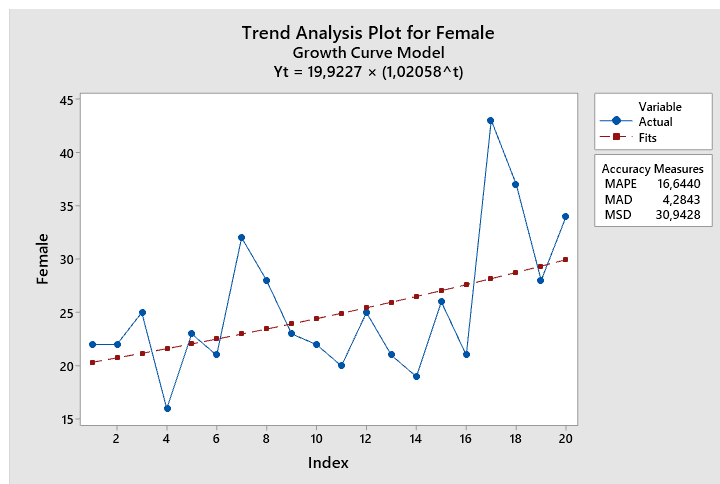

| Model                   | Automatic Fitted-Curve                               | Accuracy Measurements |               |                |
|-------------------------|------------------------------------------------------|-----------------------|---------------|----------------|
|                         |                                                      | MAPE                  | MAD           | MSD            |
| Linear model            | $Y_t = 19.38 + 0.573t$                               | 17.9781               | 4.5135        | 31.0256        |
| <b>Quadratic model*</b> | <b><math>Y_t = 24.16 - 0.729t + 0.0620t^2</math></b> | <b>15.4506</b>        | <b>3.9259</b> | <b>27.6543</b> |
| Growth curve model      | $Y_t = 19.9227 \times (1.02058^t)$                   | 16.6440               | 4.2843        | 30.9428        |

\*The best-fitted model is the one that has the lowest value for three parameters (MAPE, MAD, and MSD), or at least for two parameters out of three, or at least having the lowest value for MAPE.

## 2). Residual analysis, goodness-of-fit, and homoscedasticity for the Quadratic model

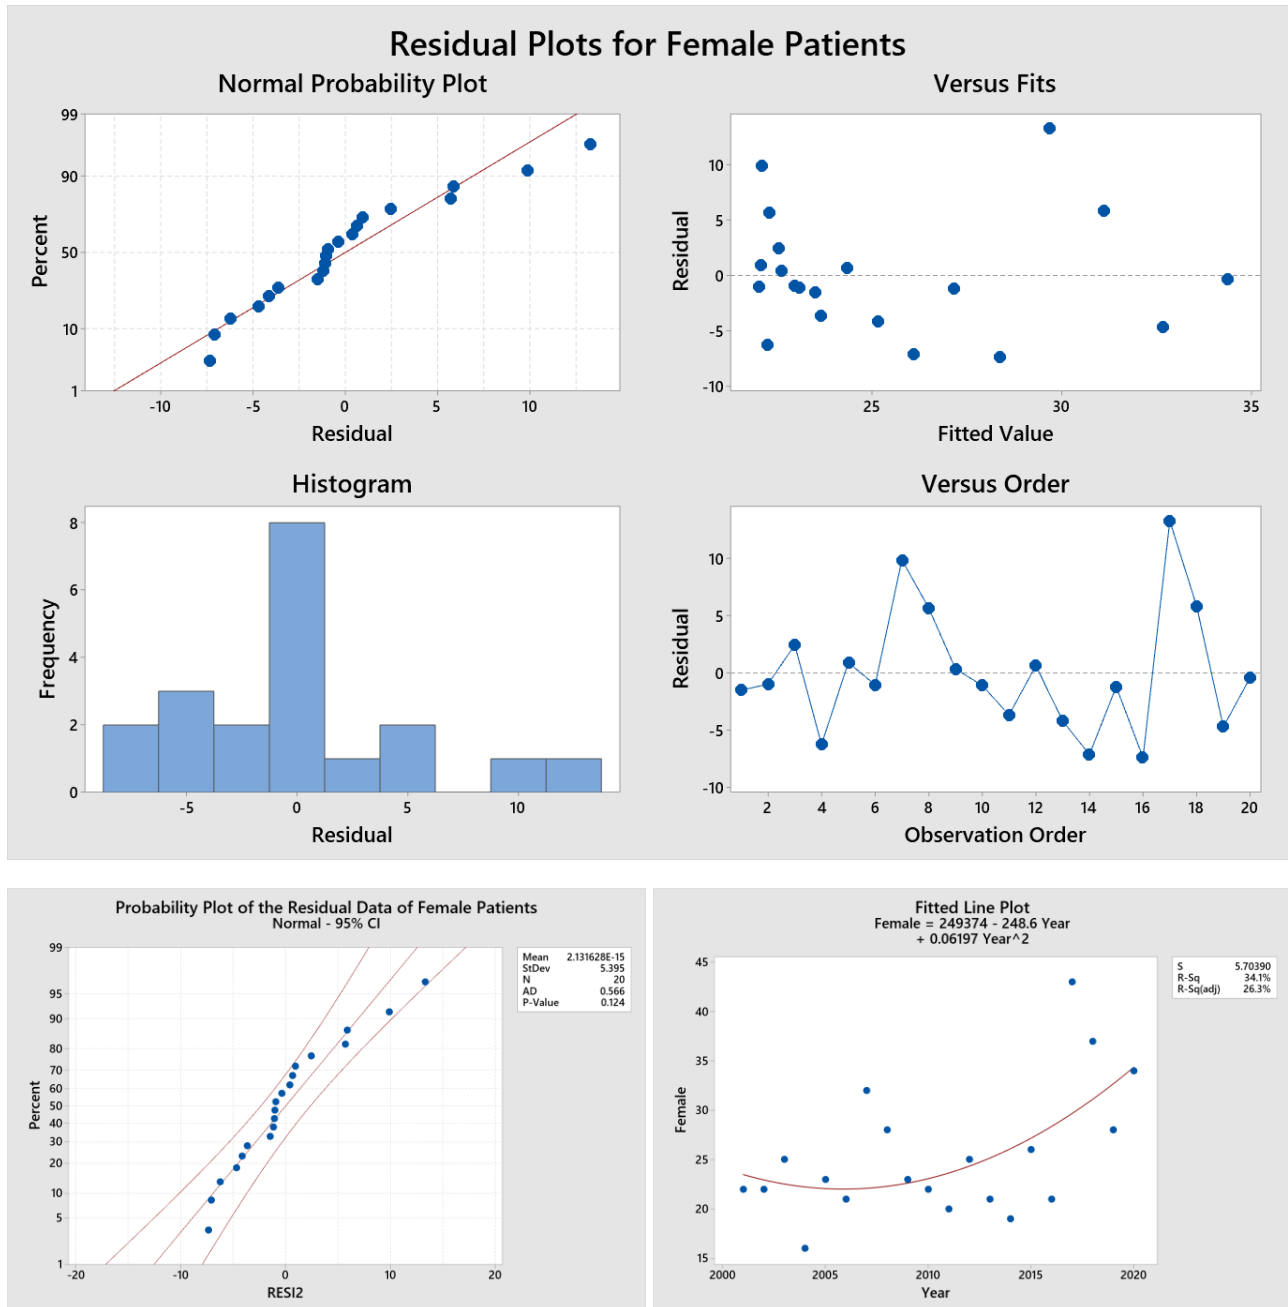

### Interpretation:

- The normality test for the residuals yielded a p-value of **0.124**, suggesting a close alignment with the red line (“zero line” or “residuals mean line” or “identity line”) and indicating a normal distribution.
- The R-square value for the Quadratic model is **34.1%**, indicating a reasonable fit of the regression model to the data.
- The plot of fitted values versus residuals shows consistent variance across all fitted values, suggesting the assumption of homoscedasticity is likely satisfied.

### 3). Autocorrelataion test

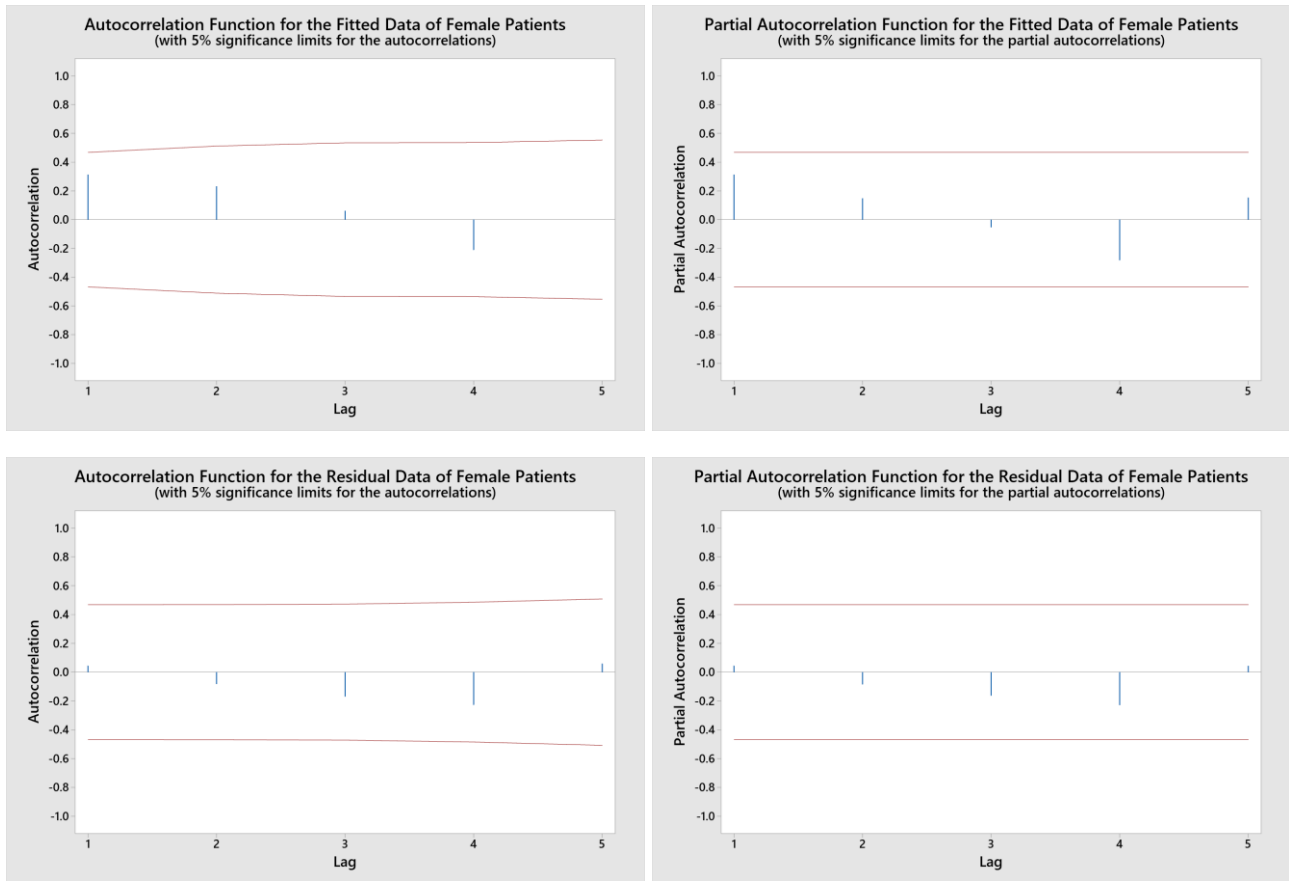

#### Interpretation:

The fitted and residual data of **female patients** show a correlation **near zero**, indicating stationarity, independence, and absence of systematic patterns. This suggests that the model effectively captures underlying data patterns and produces accurate forecasts.

### 4). The results of the significance test for the slope of the Quadratic curve estimation

#### ANOVA

|            | Sum of Squares | df | Mean Square | F     | Sig.         |
|------------|----------------|----|-------------|-------|--------------|
| Regression | 218.597        | 1  | 218.597     | 6.344 | <b>0.021</b> |
| Residual   | 620.203        | 18 | 34.456      |       |              |
| Total      | 838.800        | 19 |             |       |              |

The independent variable is the Year.

### 5). Forecasting the number of cases for the next five years using the Quadratic model

| Year         | Forecasted Cases |
|--------------|------------------|
| 2021         | 36.1877          |
| 2022         | 38.1241          |
| 2023         | 40.1843          |
| 2024         | 42.3686          |
| 2025         | 44.6768          |
| <b>Mean</b>  | 40.3083          |
| <b>Total</b> | 241.8498         |
