# Supplementary material for: Estimated projection of oral squamous cell carcinoma annual incidence from twenty years registry data: a retrospective cross-sectional study in Indonesia
Source: PeerJ. 2023 Aug 29;11:e15911. doi: 10.7717/peerj.15911 (PMC10473041; doi:10.7717/peerj.15911)
Supplement: Supplemental Information 1 [file peerj-11-15911-s001.xlsx]

## Sheet: Dataset_OSCC_Indonesian_Project
No_of_Patients	Year_Record	Five_Year_Record	Age	Age_Group	Young_Old_Patients	Sex	Tumor_Sites	Keratinization	WHO_Differentiation	Bryne_Score	Bryne_Grading	Specimen_Types	Tumor_Size	Node_Involvement_Status	Distant_Metastasis_Status	TNM_Status	Clinical_Staging	Degree_Staging	LVI	Margin_Resection
1	2009	2006-2010	45	41-50	<=45 (Young patient)	Male	Gingiva	Non-specific	Well	13	13-16 (Grade III, Poor)	Resection	T4	N2	M0	T4aN2M0	Stage IVA	Advanced Stage (III-IV)	Positive	Positive
2	2009	2006-2010	34	31-40	<=45 (Young patient)	Female	Tongue	Non-specific	Poor	8	4-8 (Grade I, Good)	Resection	T3	N2	M0	T3N2aM0	Stage IVA	Advanced Stage (III-IV)	Negative	Negative
3	2009	2006-2010	67	61-70	>45 (Old patient)	Male	Mouth Non-specific	Non-specific	Poor	7	4-8 (Grade I, Good)	Resection	T3	N1	M0	T3N1M0	Stage III	Advanced Stage (III-IV)	Positive	Positive
4	2009	2006-2010	59	51-60	>45 (Old patient)	Female	Tongue	Yes	Well	8	4-8 (Grade I, Good)	Resection	T1	N0	M0	T1N0M0	Stage I	Early Stage (I-II)	Positive	Negative
5	2009	2006-2010	36	31-40	<=45 (Young patient)	Female	Tongue	Yes	Moderate	8	4-8 (Grade I, Good)	Resection	T3	N1	M0	T3N1M0	Stage III	Advanced Stage (III-IV)	Negative	Negative
6	2009	2006-2010	44	41-50	<=45 (Young patient)	Male	Tongue	Yes	Well	8	4-8 (Grade I, Good)	Resection	T2	N0	M0	T2N0M0	Stage II	Early Stage (I-II)	Negative	Negative
7	2009	2006-2010	45	41-50	<=45 (Young patient)	Female	Tongue	Yes	Well	7	4-8 (Grade I, Good)	Resection	T4	N0	M0	T4N0M0	Stage IVA	Advanced Stage (III-IV)	Negative	Negative
8	2009	2006-2010	47	41-50	>45 (Old patient)	Male	Tongue	No	Well	8	4-8 (Grade I, Good)	Resection	T2	N0	M0	T2N0M0	Stage II	Early Stage (I-II)	Negative	Negative
9	2009	2006-2010	65	61-70	>45 (Old patient)	Female	Tongue	Yes	Well	8	4-8 (Grade I, Good)	Resection	NA	NA	NA	NA	NA	NA	Negative	Negative
10	2009	2006-2010	99	>80	>45 (Old patient)	Male	Gingiva	Yes	Moderate	11	9-12 (Grade II, Moderate)	Resection	NA	NA	NA	NA	NA	NA	Negative	Negative
11	2009	2006-2010	47	41-50	>45 (Old patient)	Female	Lip	Yes	Well	8	4-8 (Grade I, Good)	Resection	T3	N0	M0	T3N0M0	Stage III	Advanced Stage (III-IV)	Negative	Negative
12	2020	2016-2020	40	31-40	<=45 (Young patient)	Male	Lip	Yes	Moderate	9	9-12 (Grade II, Moderate)	Resection	T2	N0	M0	T2N0M0	Stage II	Early Stage (I-II)	Negative	Negative
13	2020	2016-2020	84	>80	>45 (Old patient)	Male	Gingiva	Yes	Well	8	4-8 (Grade I, Good)	Resection	T3	N0	M0	T3N0M0	Stage III	Advanced Stage (III-IV)	Negative	Negative
14	2020	2016-2020	33	31-40	<=45 (Young patient)	Female	Tongue	Yes	Moderate	11	9-12 (Grade II, Moderate)	Resection	NA	NA	NA	NA	NA	NA	Positive	Negative
15	2020	2016-2020	74	71-80	>45 (Old patient)	Female	Tongue	Yes	Well	8	4-8 (Grade I, Good)	Resection	T1	N0	M0	T1N0M0	Stage I	Early Stage (I-II)	Negative	Negative
16	2020	2016-2020	55	51-60	>45 (Old patient)	Male	Tongue	Yes	Well	11	9-12 (Grade II, Moderate)	Resection	T4	N2	M0	T4N2M0	Stage IVA	Advanced Stage (III-IV)	Negative	Negative
17	2020	2016-2020	61	61-70	>45 (Old patient)	Female	Tongue	Yes	Moderate	7	4-8 (Grade I, Good)	Resection	NA	NA	NA	NA	NA	NA	Negative	Negative
18	2020	2016-2020	57	51-60	>45 (Old patient)	Female	Tongue	Yes	Moderate	8	4-8 (Grade I, Good)	Resection	NA	NA	NA	NA	NA	NA	Negative	Negative
19	2020	2016-2020	36	31-40	<=45 (Young patient)	Male	Mouth Non-specific	Yes	Well	9	9-12 (Grade II, Moderate)	Resection	T4	N0	M0	T4aN3M0	Stage IVB	Advanced Stage (III-IV)	Positive	Positive
20	2020	2016-2020	30	21-30	<=45 (Young patient)	Male	Tongue	Yes	Moderate	9	9-12 (Grade II, Moderate)	Resection	T4	N0	M0	T4aN0M0	Stage IVA	Advanced Stage (III-IV)	Negative	Negative
21	2020	2016-2020	80	71-80	>45 (Old patient)	Male	Tongue	Yes	Moderate	10	9-12 (Grade II, Moderate)	Resection	T4	N0	M0	T4N0M0	Stage IVA	Advanced Stage (III-IV)	Negative	Negative
22	2020	2016-2020	34	31-40	<=45 (Young patient)	Female	Tongue	Yes	Well	7	4-8 (Grade I, Good)	Resection	T4	N2	M0	T4N2M0	Stage IVA	Advanced Stage (III-IV)	Negative	Negative
23	2020	2016-2020	31	31-40	<=45 (Young patient)	Male	Mouth Non-specific	Yes	Moderate	13	13-16 (Grade III, Poor)	Resection	T1	N0	M0	T1N1M0	Stage III	Advanced Stage (III-IV)	Negative	Negative
24	2020	2016-2020	51	51-60	>45 (Old patient)	Female	Buccal Mucosa	Yes	Moderate	10	9-12 (Grade II, Moderate)	Resection	T4	N1	M0	T4bN1M0	Stage IVB	Advanced Stage (III-IV)	Negative	Positive
25	2020	2016-2020	59	51-60	>45 (Old patient)	Female	Mouth Non-specific	Yes	Well	7	4-8 (Grade I, Good)	Resection	T3	N1	M0	T3N1M0	Stage III	Advanced Stage (III-IV)	Negative	Negative
26	2020	2016-2020	25	21-30	<=45 (Young patient)	Male	Tongue	Yes	Moderate	10	9-12 (Grade II, Moderate)	Resection	T1	N0	M0	T1N0M0	Stage I	Early Stage (I-II)	Negative	Negative
27	2020	2016-2020	55	51-60	>45 (Old patient)	Female	Tongue	Yes	Well	8	4-8 (Grade I, Good)	Resection	T3	N0	M0	T3N0M0	Stage III	Advanced Stage (III-IV)	Positive	Negative
28	2020	2016-2020	49	41-50	>45 (Old patient)	Male	Tongue	Yes	Moderate	11	9-12 (Grade II, Moderate)	Resection	T2	N0	M0	T2N0M0	Stage II	Early Stage (I-II)	Negative	Negative
29	2020	2016-2020	58	51-60	>45 (Old patient)	Female	Tongue	Yes	Well	7	4-8 (Grade I, Good)	Resection	T2	N0	M0	T2N0M0	Stage II	Early Stage (I-II)	Positive	Negative
30	2020	2016-2020	52	51-60	>45 (Old patient)	Female	Tongue	Yes	Poor	12	9-12 (Grade II, Moderate)	Resection	T3	N0	M0	T3N0M0	Stage III	Advanced Stage (III-IV)	Negative	Positive
31	2020	2016-2020	77	71-80	>45 (Old patient)	Male	Tongue	Yes	Tidak Berdiferensiasi	7	4-8 (Grade I, Good)	Resection	T4	N0	M0	T4cN0M0	Stage IVA	Advanced Stage (III-IV)	Positive	Negative
32	2020	2016-2020	52	51-60	>45 (Old patient)	Female	Tongue	Yes	Poor	12	9-12 (Grade II, Moderate)	Resection	T1	N0	M0	T1N0M0	Stage I	Early Stage (I-II)	Positive	Positive
33	2020	2016-2020	29	21-30	<=45 (Young patient)	Female	Tongue	Yes	Moderate	10	9-12 (Grade II, Moderate)	Resection	T3	N0	M0	T3N0M0	Stage III	Advanced Stage (III-IV)	Negative	Negative
34	2020	2016-2020	47	41-50	>45 (Old patient)	Female	Tongue	Yes	Tidak Berdiferensiasi	10	9-12 (Grade II, Moderate)	Resection	NA	NA	NA	NA	NA	NA	Negative	Negative
35	2020	2016-2020	41	41-50	<=45 (Young patient)	Male	Gingiva	No	Moderate	10	9-12 (Grade II, Moderate)	Resection	T4	N0	M0	T4aN0M0	Stage IVA	Advanced Stage (III-IV)	Negative	Positive
36	2020	2016-2020	40	31-40	<=45 (Young patient)	Female	Tongue	No	Poor	12	9-12 (Grade II, Moderate)	Resection	T2	N0	M0	T2N0M0	Stage II	Early Stage (I-II)	Positive	Negative
37	2020	2016-2020	51	51-60	>45 (Old patient)	Female	Gingiva	Yes	Moderate	9	9-12 (Grade II, Moderate)	Resection	T3	N2	M0	T3N2M0	Stage IVA	Advanced Stage (III-IV)	Positive	Negative
38	2020	2016-2020	61	61-70	>45 (Old patient)	Male	Mouth Non-specific	Yes	Well	10	9-12 (Grade II, Moderate)	Resection	T4	N1	M0	T4aN1M0	Stage IVA	Advanced Stage (III-IV)	Negative	Negative
39	2020	2016-2020	52	51-60	>45 (Old patient)	Male	Gingiva	Yes	Well	8	4-8 (Grade I, Good)	Resection	T3	N2	M0	NA	Stage IVA	Advanced Stage (III-IV)	Negative	Negative
40	2020	2016-2020	43	41-50	<=45 (Young patient)	Male	Palate	Yes	Well	8	4-8 (Grade I, Good)	Resection	T4	N0	M0	T4aN3M0	Stage IVB	Advanced Stage (III-IV)	Positive	Positive
41	2020	2016-2020	39	31-40	<=45 (Young patient)	Male	Mouth Non-specific	Yes	Poor	13	13-16 (Grade III, Poor)	Resection	T4	N2	M0	T4aN2bM0	Stage IVA	Advanced Stage (III-IV)	Positive	Positive
42	2020	2016-2020	53	51-60	>45 (Old patient)	Female	Tongue	Yes	Moderate	10	9-12 (Grade II, Moderate)	Resection	NA	NA	NA	NA	NA	NA	Negative	Negative
43	2020	2016-2020	46	41-50	>45 (Old patient)	Female	Tongue	Yes	Well	7	4-8 (Grade I, Good)	Resection	T2	N0	M0	T2N0M0	Stage II	Early Stage (I-II)	Negative	Negative
44	2020	2016-2020	63	61-70	>45 (Old patient)	Male	Tongue	Yes	Tidak Berdiferensiasi	8	4-8 (Grade I, Good)	Resection	T2	N0	M0	T2N0M0	Stage II	Early Stage (I-II)	Negative	Negative
45	2020	2016-2020	63	61-70	>45 (Old patient)	Male	Buccal Mucosa	Yes	Tidak Berdiferensiasi	11	9-12 (Grade II, Moderate)	Resection	T4	N1	M0	T4aN1M0	Stage IVA	Advanced Stage (III-IV)	Negative	Negative
46	2020	2016-2020	60	51-60	>45 (Old patient)	Male	Tongue	Yes	Moderate	10	9-12 (Grade II, Moderate)	Resection	T2	N0	M0	T2N0M0	Stage II	Early Stage (I-II)	Negative	Negative
47	2019	2016-2020	48	41-50	>45 (Old patient)	Male	Tongue	Yes	Well	8	4-8 (Grade I, Good)	Resection	T3	N0	M0	T3N0M0	Stage III	Advanced Stage (III-IV)	Positive	Negative
48	2019	2016-2020	51	51-60	>45 (Old patient)	Female	Tongue	Yes	Well	11	9-12 (Grade II, Moderate)	Resection	NA	NA	NA	NA	NA	NA	Negative	Negative
49	2019	2016-2020	43	41-50	<=45 (Young patient)	Female	Tongue	Yes	Moderate	12	9-12 (Grade II, Moderate)	Resection	T2	N1	M0	T2N1M0	Stage III	Advanced Stage (III-IV)	Positive	Negative
50	2019	2016-2020	77	71-80	>45 (Old patient)	Male	Tongue	Yes	Well	8	4-8 (Grade I, Good)	Resection	T1	N0	M0	T1N0M0	Stage I	Early Stage (I-II)	Negative	Negative
51	2019	2016-2020	63	61-70	>45 (Old patient)	Male	Tongue	Yes	Moderate	9	9-12 (Grade II, Moderate)	Resection	NA	NA	NA	NA	NA	NA	Positive	Negative
52	2019	2016-2020	59	51-60	>45 (Old patient)	Female	Tongue	Yes	Well	4	4-8 (Grade I, Good)	Resection	T4	N1	M0	T4aN1M0	Stage IVA	Advanced Stage (III-IV)	Positive	Negative
53	2019	2016-2020	32	31-40	<=45 (Young patient)	Male	Tongue	Yes	Well	8	4-8 (Grade I, Good)	Resection	T3	N0	M0	T3N0M0	Stage III	Advanced Stage (III-IV)	Negative	Negative
54	2019	2016-2020	34	31-40	<=45 (Young patient)	Male	Tongue	Yes	Well	7	4-8 (Grade I, Good)	Resection	T2	N0	M0	T2N0M0	Stage II	Early Stage (I-II)	Negative	Negative
55	2019	2016-2020	64	61-70	>45 (Old patient)	Female	Mouth Non-specific	Yes	Well	6	4-8 (Grade I, Good)	Resection	T1	N0	M0	T1N0M0	Stage I	Early Stage (I-II)	Negative	Negative
56	2019	2016-2020	52	51-60	>45 (Old patient)	Female	Mouth Non-specific	Yes	Well	9	9-12 (Grade II, Moderate)	Resection	T4	N0	M0	T4aN0M0	Stage IVA	Advanced Stage (III-IV)	Negative	Positive
57	2019	2016-2020	60	51-60	>45 (Old patient)	Male	Mouth Non-specific	Yes	Poor	13	13-16 (Grade III, Poor)	Resection	NA	NA	NA	NA	NA	NA	Negative	Negative
58	2019	2016-2020	81	>80	>45 (Old patient)	Male	Palate	Yes	Well	7	4-8 (Grade I, Good)	Resection	T2	N0	M0	T2N0M0	Stage II	Early Stage (I-II)	Negative	Negative
59	2019	2016-2020	39	31-40	<=45 (Young patient)	Male	Tongue	Yes	Well	7	4-8 (Grade I, Good)	Resection	T4	N1	M0	T4aN1M0	Stage IVA	Advanced Stage (III-IV)	Positive	Positive
60	2019	2016-2020	25	21-30	<=45 (Young patient)	Male	Tongue	Yes	Well	6	4-8 (Grade I, Good)	Resection	T2	N0	M0	T2N0M0	Stage II	Early Stage (I-II)	Negative	Negative
61	2019	2016-2020	68	61-70	>45 (Old patient)	Male	Tongue	Yes	Moderate	8	4-8 (Grade I, Good)	Resection	T3	N0	M0	T3N0M0	Stage III	Advanced Stage (III-IV)	Negative	Negative
62	2019	2016-2020	53	51-60	>45 (Old patient)	Female	Tongue	Yes	Moderate	10	9-12 (Grade II, Moderate)	Resection	T4	N2	M0	T4aN2bM0	Stage IVA	Advanced Stage (III-IV)	Negative	Positive
63	2019	2016-2020	39	31-40	<=45 (Young patient)	Male	Tongue	Yes	Tidak Berdiferensiasi	12	9-12 (Grade II, Moderate)	Resection	T4	N1	M0	T4bN1M0	Stage IVB	Advanced Stage (III-IV)	Negative	Negative
64	2019	2016-2020	61	61-70	>45 (Old patient)	Male	Tongue	Yes	Tidak Berdiferensiasi	10	9-12 (Grade II, Moderate)	Resection	T4	N2	M0	T4aN2bM0	Stage IVA	Advanced Stage (III-IV)	Negative	Positive
65	2019	2016-2020	52	51-60	>45 (Old patient)	Male	Mouth Non-specific	Yes	Well	NA	4-8 (Grade I, Good)	Resection	T4	N1	M0	T4aN1M0	Stage IVA	Advanced Stage (III-IV)	Positive	Positive
66	2019	2016-2020	57	51-60	>45 (Old patient)	Female	Tongue	Yes	Well	8	4-8 (Grade I, Good)	Resection	T2	N2	M0	T2N2bM0	Stage IVA	Advanced Stage (III-IV)	Negative	Negative
67	2019	2016-2020	56	51-60	>45 (Old patient)	Female	Tongue	Yes	Moderate	10	9-12 (Grade II, Moderate)	Resection	T2	N0	M0	T2N0M0	Stage II	Early Stage (I-II)	Positive	Positive
68	2019	2016-2020	70	61-70	>45 (Old patient)	Male	Gingiva	Yes	Moderate	8	4-8 (Grade I, Good)	Resection	T4	N0	M0	T4aN0M0	Stage IVA	Advanced Stage (III-IV)	Negative	Negative
69	2019	2016-2020	36	31-40	<=45 (Young patient)	Female	Tongue	Yes	Well	8	4-8 (Grade I, Good)	Resection	T4	N0	M0	T4aN0M0	Stage IVA	Advanced Stage (III-IV)	Negative	Negative
70	2019	2016-2020	36	31-40	<=45 (Young patient)	Male	Tongue	Yes	Well	8	4-8 (Grade I, Good)	Resection	T1	N0	M0	T1N0M0	Stage I	Early Stage (I-II)	Negative	Negative
71	2019	2016-2020	72	71-80	>45 (Old patient)	Female	Tongue	Yes	Tidak Berdiferensiasi	9	9-12 (Grade II, Moderate)	Resection	T3	N0	M0	T3N0M0	Stage III	Advanced Stage (III-IV)	Negative	Negative
72	2019	2016-2020	51	51-60	>45 (Old patient)	Male	Mouth Non-specific	Yes	Well	8	4-8 (Grade I, Good)	Resection	T1	N0	M0	T1N0M0	Stage I	Early Stage (I-II)	Negative	Negative
73	2019	2016-2020	78	71-80	>45 (Old patient)	Female	Lip	Yes	Well	7	4-8 (Grade I, Good)	Resection	T2	N0	M0	T2N0M0	Stage II	Early Stage (I-II)	Negative	Negative
74	2019	2016-2020	31	31-40	<=45 (Young patient)	Female	Tongue	Non-specific	Poor	8	4-8 (Grade I, Good)	Resection	NA	NA	NA	NA	NA	NA	Negative	Negative
75	2019	2016-2020	41	41-50	<=45 (Young patient)	Female	Tongue	Yes	Well	7	4-8 (Grade I, Good)	Resection	T2	N1	M0	T2N1M0	Stage III	Advanced Stage (III-IV)	Positive	Negative
76	2019	2016-2020	56	51-60	>45 (Old patient)	Female	Tongue	No	Poor	14	13-16 (Grade III, Poor)	Resection	T3	N1	M0	T3N1M0	Stage III	Advanced Stage (III-IV)	Positive	Negative
77	2019	2016-2020	57	51-60	>45 (Old patient)	Male	Tongue	Yes	Moderate	6	4-8 (Grade I, Good)	Resection	T3	N1	M0	T3N1M0	Stage III	Advanced Stage (III-IV)	Positive	Negative
78	2019	2016-2020	53	51-60	>45 (Old patient)	Male	Tongue	Yes	Well	6	4-8 (Grade I, Good)	Resection	T2	N0	M0	T2N0M0	Stage II	Early Stage (I-II)	Negative	Negative
79	2018	2016-2020	42	41-50	<=45 (Young patient)	Male	Tongue	No	Well	8	4-8 (Grade I, Good)	Resection	T3	N2	M0	T3N2bM0	Stage IVA	Advanced Stage (III-IV)	Positive	Positive
80	2018	2016-2020	39	31-40	<=45 (Young patient)	Male	Tongue	Yes	Moderate	12	9-12 (Grade II, Moderate)	Resection	T4	N1	M0	T4bN1M0	Stage IVB	Advanced Stage (III-IV)	Negative	Negative
81	2018	2016-2020	39	31-40	<=45 (Young patient)	Male	Tongue	Yes	Well	6	4-8 (Grade I, Good)	Resection	T4	N2	M0	T4N2M0	Stage IVA	Advanced Stage (III-IV)	Positive	Negative
82	2018	2016-2020	77	71-80	>45 (Old patient)	Female	Gingiva	Yes	Well	13	13-16 (Grade III, Poor)	Resection	T4	N2	M0	T4aN2bM0	Stage IVA	Advanced Stage (III-IV)	Positive	Negative
83	2018	2016-2020	49	41-50	>45 (Old patient)	Female	Tongue	No	Moderate	8	4-8 (Grade I, Good)	Resection	NA	NA	NA	NA	NA	NA	Negative	Positive
84	2018	2016-2020	47	41-50	>45 (Old patient)	Male	Tongue	No	Poor	10	9-12 (Grade II, Moderate)	Resection	T4	N2	M0	T4bN2cM0	Stage IVB	Advanced Stage (III-IV)	Negative	Negative
85	2018	2016-2020	47	41-50	>45 (Old patient)	Male	Tongue	Yes	Well	6	4-8 (Grade I, Good)	Resection	NA	NA	NA	NA	NA	NA	Negative	Negative
86	2018	2016-2020	40	31-40	<=45 (Young patient)	Male	Gingiva	Yes	Poor	13	13-16 (Grade III, Poor)	Resection	T4	N1	M0	T4aN1M0	Stage IVA	Advanced Stage (III-IV)	Positive	Negative
87	2018	2016-2020	31	31-40	<=45 (Young patient)	Female	Tongue	Yes	Well	7	4-8 (Grade I, Good)	Resection	T3	N0	M0	T3N0M0	Stage III	Advanced Stage (III-IV)	Negative	Negative
88	2018	2016-2020	32	31-40	<=45 (Young patient)	Female	Tongue	Yes	Moderate	8	4-8 (Grade I, Good)	Resection	T4	N2	M0	T4bN2cM0	Stage IVB	Advanced Stage (III-IV)	Positive	Negative
89	2018	2016-2020	36	31-40	<=45 (Young patient)	Male	Tongue	Yes	Well	7	4-8 (Grade I, Good)	Resection	T4	N2	M0	T4bN2bM0	Stage IVB	Advanced Stage (III-IV)	Positive	Negative
90	2018	2016-2020	30	21-30	<=45 (Young patient)	Female	Tongue	Yes	Well	9	9-12 (Grade II, Moderate)	Resection	T2	N0	M0	T2N0M0	Stage II	Early Stage (I-II)	Positive	Negative
91	2018	2016-2020	48	41-50	>45 (Old patient)	Male	Tongue	Yes	Well	6	4-8 (Grade I, Good)	Resection	T2	N1	M0	T2N1M0	Stage III	Advanced Stage (III-IV)	Positive	Negative
92	2018	2016-2020	66	61-70	>45 (Old patient)	Male	Tongue	Yes	Well	8	4-8 (Grade I, Good)	Resection	T2	N1	M0	T2N1M0	Stage III	Advanced Stage (III-IV)	Positive	Negative
93	2018	2016-2020	45	41-50	<=45 (Young patient)	Male	Tongue	No	Poor	14	13-16 (Grade III, Poor)	Resection	T4	N1	M0	T4aN1M0	Stage IVA	Advanced Stage (III-IV)	Negative	Negative
94	2018	2016-2020	40	31-40	<=45 (Young patient)	Male	Tongue	Yes	Well	8	4-8 (Grade I, Good)	Resection	T2	N1	M0	T2N1M1	Stage IVC	Advanced Stage (III-IV)	Negative	Negative
95	2018	2016-2020	65	61-70	>45 (Old patient)	Male	Palate	Yes	Well	13	13-16 (Grade III, Poor)	Resection	T4	N2	M0	T4aN2M0	Stage IVA	Advanced Stage (III-IV)	Positive	Negative
96	2018	2016-2020	33	31-40	<=45 (Young patient)	Male	Tongue	Yes	Moderate	9	9-12 (Grade II, Moderate)	Resection	T4	N2	M0	T4aN3M0	Stage IVB	Advanced Stage (III-IV)	Positive	Negative
97	2018	2016-2020	41	41-50	<=45 (Young patient)	Female	Tongue	Yes	Well	6	4-8 (Grade I, Good)	Resection	T4	N0	M0	T4aN0M0	Stage IVA	Advanced Stage (III-IV)	Positive	Negative
98	2018	2016-2020	43	41-50	<=45 (Young patient)	Female	Tongue	Yes	Well	7	4-8 (Grade I, Good)	Resection	T4	N1	M0	T4aN1M0	Stage IVA	Advanced Stage (III-IV)	Positive	Negative
99	2018	2016-2020	49	41-50	>45 (Old patient)	Female	Tongue	Yes	Poor	10	9-12 (Grade II, Moderate)	Resection	T4	N1	M0	T4aN1M0	Stage IVA	Advanced Stage (III-IV)	Negative	Negative
100	2018	2016-2020	44	41-50	<=45 (Young patient)	Male	Tongue	Yes	Well	8	4-8 (Grade I, Good)	Resection	T4	N2	M0	T4aN2M0	Stage IVA	Advanced Stage (III-IV)	Positive	Negative
101	2018	2016-2020	60	51-60	>45 (Old patient)	Female	Buccal Mucosa	No	Moderate	7	4-8 (Grade I, Good)	Resection	T4	N1	M0	T4aN1M0	Stage IVA	Advanced Stage (III-IV)	Positive	Negative
102	2018	2016-2020	43	41-50	<=45 (Young patient)	Male	Tongue	Yes	Moderate	10	9-12 (Grade II, Moderate)	Resection	T4	N2	M0	T4bN2aM0	Stage IVB	Advanced Stage (III-IV)	Positive	Negative
103	2018	2016-2020	66	61-70	>45 (Old patient)	Female	Tongue	Yes	Well	8	4-8 (Grade I, Good)	Resection	T4	N0	M0	T4aN0M0	Stage IVA	Advanced Stage (III-IV)	Negative	Negative
104	2018	2016-2020	50	41-50	>45 (Old patient)	Male	Tongue	Yes	Well	6	4-8 (Grade I, Good)	Resection	T4	N1	M0	T4aN1M0	Stage IVA	Advanced Stage (III-IV)	Positive	Negative
105	2018	2016-2020	34	31-40	<=45 (Young patient)	Female	Tongue	Yes	Well	7	4-8 (Grade I, Good)	Resection	T4	N2	M0	T4aN2bM0	Stage IVA	Advanced Stage (III-IV)	Positive	Negative
106	2018	2016-2020	62	61-70	>45 (Old patient)	Female	Mouth Non-specific	Yes	Poor	13	13-16 (Grade III, Poor)	Resection	T4	N0	M0	T4N0M0	Stage IVA	Advanced Stage (III-IV)	Negative	Negative
107	2018	2016-2020	60	51-60	>45 (Old patient)	Female	Mouth Non-specific	Yes	Poor	8	4-8 (Grade I, Good)	Resection	NA	NA	NA	NA	NA	NA	Positive	Negative
108	2018	2016-2020	55	51-60	>45 (Old patient)	Female	Mouth Non-specific	Non-specific	Poor	10	9-12 (Grade II, Moderate)	Resection	T4	N1	M0	T4aN1M0	Stage IVA	Advanced Stage (III-IV)	Positive	Negative
109	2018	2016-2020	26	21-30	<=45 (Young patient)	Female	Mouth Non-specific	Yes	Well	9	9-12 (Grade II, Moderate)	Resection	T4	N2	M0	T4aN2bM0	Stage IVA	Advanced Stage (III-IV)	Positive	Negative
110	2018	2016-2020	54	51-60	>45 (Old patient)	Female	Tongue	Yes	Well	8	4-8 (Grade I, Good)	Resection	NA	NA	NA	NA	NA	NA	Negative	Negative
111	2018	2016-2020	55	51-60	>45 (Old patient)	Female	Tongue	Yes	Poor	14	13-16 (Grade III, Poor)	Resection	T3	N1	M0	T3N1M0	Stage III	Advanced Stage (III-IV)	Positive	Negative
112	2018	2016-2020	64	61-70	>45 (Old patient)	Male	Tongue	Yes	Moderate	10	9-12 (Grade II, Moderate)	Resection	T4	N0	M0	T4N0M0	Stage IVA	Advanced Stage (III-IV)	Positive	Negative
113	2018	2016-2020	58	51-60	>45 (Old patient)	Male	Tongue	Yes	Moderate	10	9-12 (Grade II, Moderate)	Resection	T4	N1	M0	T4bN1M0	Stage IVB	Advanced Stage (III-IV)	Positive	Negative
114	2018	2016-2020	63	61-70	>45 (Old patient)	Female	Tongue	Yes	Tidak Berdiferensiasi	11	9-12 (Grade II, Moderate)	Resection	T4	N2	M0	T4aN2bM0	Stage IVA	Advanced Stage (III-IV)	Positive	Negative
115	2018	2016-2020	25	21-30	<=45 (Young patient)	Male	Tongue	Yes	Moderate	7	4-8 (Grade I, Good)	Resection	T2	N1	M0	T2N1M0	Stage III	Advanced Stage (III-IV)	Positive	Negative
116	2018	2016-2020	41	41-50	<=45 (Young patient)	Female	Tongue	Yes	Well	7	4-8 (Grade I, Good)	Resection	T4	N0	M0	T4aN0M0	Stage IVA	Advanced Stage (III-IV)	Negative	Negative
117	2018	2016-2020	29	21-30	<=45 (Young patient)	Female	Tongue	Yes	Well	13	13-16 (Grade III, Poor)	Resection	T4	N2	M0	T4bN2cM0	Stage IVB	Advanced Stage (III-IV)	Positive	Negative
118	2018	2016-2020	41	41-50	<=45 (Young patient)	Female	Tongue	Yes	Well	8	4-8 (Grade I, Good)	Resection	T4	N1	M0	T4aN1M0	Stage IVA	Advanced Stage (III-IV)	Positive	Negative
119	2018	2016-2020	50	41-50	>45 (Old patient)	Male	Tongue	Yes	Well	8	4-8 (Grade I, Good)	Resection	T4	N0	M0	T4N0M0	Stage IVA	Advanced Stage (III-IV)	Negative	Negative
120	2018	2016-2020	52	51-60	>45 (Old patient)	Male	Tongue	Yes	Poor	11	9-12 (Grade II, Moderate)	Resection	T4	N2	M0	T4N2M0	Stage IVA	Advanced Stage (III-IV)	Negative	Negative
121	2018	2016-2020	36	31-40	<=45 (Young patient)	Male	Tongue	Yes	Well	7	4-8 (Grade I, Good)	Resection	T4	N2	M0	T4aN2bM0	Stage IVA	Advanced Stage (III-IV)	Positive	Positive
122	2018	2016-2020	44	41-50	<=45 (Young patient)	Female	Tongue	Yes	Well	8	4-8 (Grade I, Good)	Resection	T4	N2	M0	T4N2bM0	Stage IVA	Advanced Stage (III-IV)	Positive	Negative
123	2018	2016-2020	63	61-70	>45 (Old patient)	Male	Tongue	Yes	Well	7	4-8 (Grade I, Good)	Resection	T4	N1	M0	T4aN1M0	Stage IVA	Advanced Stage (III-IV)	Negative	Negative
124	2018	2016-2020	69	61-70	>45 (Old patient)	Female	Tongue	Yes	Well	8	4-8 (Grade I, Good)	Resection	T4	N0	M0	T4N0M0	Stage IVA	Advanced Stage (III-IV)	Positive	Negative
125	2018	2016-2020	19	11-20	<=45 (Young patient)	Female	Tongue	Yes	Well	8	4-8 (Grade I, Good)	Resection	T4	N2	M1	T4bN2cM1	Stage IVC	Advanced Stage (III-IV)	Positive	Negative
126	2018	2016-2020	39	31-40	<=45 (Young patient)	Male	Tongue	Yes	Well	8	4-8 (Grade I, Good)	Resection	T3	N1	M0	T3N1M0	Stage III	Advanced Stage (III-IV)	Positive	Negative
127	2018	2016-2020	35	31-40	<=45 (Young patient)	Male	Tongue	Yes	Poor	10	9-12 (Grade II, Moderate)	Resection	T4	N0	M0	T4aN0M0	Stage IVA	Advanced Stage (III-IV)	Negative	Negative
128	2018	2016-2020	54	51-60	>45 (Old patient)	Female	Mouth Non-specific	No	Poor	12	9-12 (Grade II, Moderate)	Resection	T4	N2	M0	T4N2M0	Stage IVA	Advanced Stage (III-IV)	Positive	Negative
129	2018	2016-2020	63	61-70	>45 (Old patient)	Female	Tongue	Yes	Tidak Berdiferensiasi	10	9-12 (Grade II, Moderate)	Resection	T4	N1	M0	T4aN1M0	Stage IVA	Advanced Stage (III-IV)	Positive	Negative
130	2018	2016-2020	67	61-70	>45 (Old patient)	Female	Lip	Yes	Well	7	4-8 (Grade I, Good)	Resection	T2	N0	M0	T2N0M0	Stage II	Early Stage (I-II)	Positive	Negative
131	2018	2016-2020	57	51-60	>45 (Old patient)	Female	Tongue	No	Well	8	4-8 (Grade I, Good)	Resection	T4	N2	M1	T4cN2aM1	Stage IVC	Advanced Stage (III-IV)	Positive	Negative
132	2017	2016-2020	62	61-70	>45 (Old patient)	Male	Palate	Yes	Well	9	9-12 (Grade II, Moderate)	Resection	T4	N1	M0	T4aN1M0	Stage IVA	Advanced Stage (III-IV)	Positive	Negative
133	2017	2016-2020	63	61-70	>45 (Old patient)	Female	Tongue	Yes	Moderate	7	4-8 (Grade I, Good)	Resection	T4	N2	M0	T4aN2bM0	Stage IVA	Advanced Stage (III-IV)	Positive	Negative
134	2017	2016-2020	33	31-40	<=45 (Young patient)	Female	Buccal Mucosa	Yes	Moderate	12	9-12 (Grade II, Moderate)	Resection	T4	N2	M0	T4aN2bM0	Stage IVA	Advanced Stage (III-IV)	Positive	Negative
135	2017	2016-2020	48	41-50	>45 (Old patient)	Female	Tongue	Yes	Well	13	13-16 (Grade III, Poor)	Resection	T4	N1	M0	T4aN1M0	Stage IVA	Advanced Stage (III-IV)	Positive	Negative
136	2017	2016-2020	48	41-50	>45 (Old patient)	Female	Gingiva	Yes	Tidak Berdiferensiasi	13	13-16 (Grade III, Poor)	Resection	T4	N0	M0	T4N0M0	Stage IVA	Advanced Stage (III-IV)	Negative	Negative
137	2017	2016-2020	20	11-20	<=45 (Young patient)	Male	Tongue	Yes	Poor	15	13-16 (Grade III, Poor)	Resection	T4	N2	M0	T4aN2bM0	Stage IVA	Advanced Stage (III-IV)	Positive	Negative
138	2017	2016-2020	60	51-60	>45 (Old patient)	Female	Buccal Mucosa	Yes	Moderate	7	4-8 (Grade I, Good)	Resection	T4	N0	M0	T4aN3M0	Stage IVB	Advanced Stage (III-IV)	Positive	Negative
139	2017	2016-2020	40	31-40	<=45 (Young patient)	Female	Tongue	Yes	Well	7	4-8 (Grade I, Good)	Resection	T4	N2	M0	T4aN2bM0	Stage IVA	Advanced Stage (III-IV)	Positive	Negative
140	2017	2016-2020	54	51-60	>45 (Old patient)	Male	Tongue	Yes	Moderate	7	4-8 (Grade I, Good)	Resection	T4	N1	M0	T4bN1M0	Stage IVB	Advanced Stage (III-IV)	Positive	Negative
141	2017	2016-2020	34	31-40	<=45 (Young patient)	Female	Tongue	Yes	Well	7	4-8 (Grade I, Good)	Resection	T4	N2	M0	T4aN2bM0	Stage IVA	Advanced Stage (III-IV)	Positive	Negative
142	2017	2016-2020	32	31-40	<=45 (Young patient)	Male	Tongue	Yes	Moderate	13	13-16 (Grade III, Poor)	Resection	T4	N0	M0	T4N0M0	Stage IVA	Advanced Stage (III-IV)	Positive	Negative
143	2017	2016-2020	39	31-40	<=45 (Young patient)	Male	Tongue	Yes	Well	6	4-8 (Grade I, Good)	Resection	T4	N0	M0	T4aN0M0	Stage IVA	Advanced Stage (III-IV)	Negative	Negative
144	2017	2016-2020	58	51-60	>45 (Old patient)	Male	Tongue	Yes	Well	6	4-8 (Grade I, Good)	Resection	T4	N1	M0	T4aN1M0	Stage IVA	Advanced Stage (III-IV)	Positive	Negative
145	2017	2016-2020	54	51-60	>45 (Old patient)	Female	Tongue	Yes	Tidak Berdiferensiasi	6	4-8 (Grade I, Good)	Resection	T4	N2	M0	T4aN2bM0	Stage IVA	Advanced Stage (III-IV)	Positive	Negative
146	2017	2016-2020	62	61-70	>45 (Old patient)	Female	Tongue	Yes	Well	5	4-8 (Grade I, Good)	Resection	T4	N0	M0	T4aN0M0	Stage IVA	Advanced Stage (III-IV)	Negative	Negative
147	2017	2016-2020	35	31-40	<=45 (Young patient)	Male	Tongue	Yes	Poor	11	9-12 (Grade II, Moderate)	Resection	T4	N0	M0	T4aN0M0	Stage IVA	Advanced Stage (III-IV)	Positive	Negative
148	2017	2016-2020	70	61-70	>45 (Old patient)	Male	Palate	Yes	Well	8	4-8 (Grade I, Good)	Resection	NA	NA	NA	NA	NA	NA	Negative	Negative
149	2017	2016-2020	49	41-50	>45 (Old patient)	Male	Mouth Non-specific	Yes	Well	5	4-8 (Grade I, Good)	Resection	T2	N0	M0	T2N0M0	Stage II	Early Stage (I-II)	Negative	Negative
150	2017	2016-2020	61	61-70	>45 (Old patient)	Male	Tongue	Yes	Well	7	4-8 (Grade I, Good)	Resection	T4	N1	M0	T4aN1M0	Stage IVA	Advanced Stage (III-IV)	Positive	Negative
151	2017	2016-2020	27	21-30	<=45 (Young patient)	Female	Tongue	Yes	Poor	13	13-16 (Grade III, Poor)	Resection	T2	N0	M0	T2N0M0	Stage II	Early Stage (I-II)	Negative	Negative
152	2017	2016-2020	49	41-50	>45 (Old patient)	Male	Tongue	Yes	Well	6	4-8 (Grade I, Good)	Resection	T4	N1	M0	T4aN1M0	Stage IVA	Advanced Stage (III-IV)	Positive	Negative
153	2017	2016-2020	50	41-50	>45 (Old patient)	Female	Tongue	Yes	Moderate	10	9-12 (Grade II, Moderate)	Resection	T4	N2	M0	T4aN2bM0	Stage IVA	Advanced Stage (III-IV)	Positive	Negative
154	2017	2016-2020	54	51-60	>45 (Old patient)	Female	Tongue	Yes	Well	5	4-8 (Grade I, Good)	Resection	T4	N0	M0	T4aN0M0	Stage IVA	Advanced Stage (III-IV)	Negative	Negative
155	2017	2016-2020	58	51-60	>45 (Old patient)	Male	FOM	Yes	Moderate	10	9-12 (Grade II, Moderate)	Resection	T4	N1	M0	T4N1M0	Stage IVA	Advanced Stage (III-IV)	Positive	Negative
156	2017	2016-2020	28	21-30	<=45 (Young patient)	Male	Tongue	Yes	Moderate	11	9-12 (Grade II, Moderate)	Resection	T4	N2	M0	T4bN2bM0	Stage IVB	Advanced Stage (III-IV)	Positive	Negative
157	2017	2016-2020	32	31-40	<=45 (Young patient)	Female	Tongue	Yes	Well	12	9-12 (Grade II, Moderate)	Resection	T4	N0	M0	T4aN0M0	Stage IVA	Advanced Stage (III-IV)	Positive	Negative
158	2017	2016-2020	32	31-40	<=45 (Young patient)	Female	Tongue	Yes	Well	7	4-8 (Grade I, Good)	Resection	NA	NA	NA	NA	NA	NA	Negative	Negative
159	2017	2016-2020	38	31-40	<=45 (Young patient)	Male	Tongue	Yes	Well	4	4-8 (Grade I, Good)	Resection	T4	N2	M0	T4aN2bM0	Stage IVA	Advanced Stage (III-IV)	Positive	Negative
160	2017	2016-2020	58	51-60	>45 (Old patient)	Male	Lip	Yes	Well	8	4-8 (Grade I, Good)	Resection	T3	N0	M0	T3N0M0	Stage III	Advanced Stage (III-IV)	Negative	Negative
161	2017	2016-2020	52	51-60	>45 (Old patient)	Male	Tongue	Yes	Well	8	4-8 (Grade I, Good)	Resection	T4	N2	M0	T4aN2bM0	Stage IVA	Advanced Stage (III-IV)	Positive	Negative
162	2017	2016-2020	43	41-50	<=45 (Young patient)	Female	Tongue	Yes	Tidak Berdiferensiasi	10	9-12 (Grade II, Moderate)	Resection	T4	N2	M0	T4N2bM0	Stage IVA	Advanced Stage (III-IV)	Positive	Negative
163	2017	2016-2020	74	71-80	>45 (Old patient)	Female	Tongue	No	Tidak Berdiferensiasi	11	9-12 (Grade II, Moderate)	Resection	T4	N0	M0	T4aN3M0	Stage IVB	Advanced Stage (III-IV)	Positive	Negative
164	2017	2016-2020	40	31-40	<=45 (Young patient)	Female	Tongue	Yes	Well	6	4-8 (Grade I, Good)	Resection	T4	N1	M0	T4aN1M0	Stage IVA	Advanced Stage (III-IV)	Positive	Negative
165	2017	2016-2020	64	61-70	>45 (Old patient)	Male	Gingiva	Yes	Well	8	4-8 (Grade I, Good)	Resection	T2	N0	M0	T2N0M0	Stage II	Early Stage (I-II)	Negative	Negative
166	2017	2016-2020	63	61-70	>45 (Old patient)	Female	Mouth Non-specific	Yes	Well	8	4-8 (Grade I, Good)	Resection	T4	N2	M0	T4bN2M0	Stage IVB	Advanced Stage (III-IV)	Positive	Negative
167	2017	2016-2020	54	51-60	>45 (Old patient)	Female	Mouth Non-specific	No	Poor	13	13-16 (Grade III, Poor)	Resection	T4	N2	M0	T4N2bM0	Stage IVA	Advanced Stage (III-IV)	Positive	Positive
168	2017	2016-2020	53	51-60	>45 (Old patient)	Female	Buccal Mucosa	No	Moderate	11	9-12 (Grade II, Moderate)	Resection	T4	N1	M0	T4bN1M0	Stage IVB	Advanced Stage (III-IV)	Positive	Positive
169	2017	2016-2020	48	41-50	>45 (Old patient)	Male	Tongue	Yes	Moderate	8	4-8 (Grade I, Good)	Resection	T4	N2	M0	T4aN2bM0	Stage IVA	Advanced Stage (III-IV)	Positive	Positive
170	2017	2016-2020	28	21-30	<=45 (Young patient)	Female	Tongue	Yes	Moderate	14	13-16 (Grade III, Poor)	Resection	T4	N2	M0	T4aN2bM0	Stage IVA	Advanced Stage (III-IV)	Positive	Positive
171	2017	2016-2020	33	31-40	<=45 (Young patient)	Female	Tongue	Yes	Well	8	4-8 (Grade I, Good)	Resection	T4	N2	M0	T4bN2cM0	Stage IVB	Advanced Stage (III-IV)	Positive	Positive
172	2017	2016-2020	44	41-50	<=45 (Young patient)	Female	Palate	Yes	Moderate	12	9-12 (Grade II, Moderate)	Resection	T4	N2	M0	T4bN2M0	Stage IVB	Advanced Stage (III-IV)	Positive	Positive
173	2017	2016-2020	77	71-80	>45 (Old patient)	Female	Tongue	Yes	Well	10	9-12 (Grade II, Moderate)	Resection	T2	N0	M0	T2N0M0	Stage II	Early Stage (I-II)	Negative	Negative
174	2017	2016-2020	69	61-70	>45 (Old patient)	Female	Tongue	Yes	Well	8	4-8 (Grade I, Good)	Resection	T2	N2	M0	T2N2cM0	Stage IVA	Advanced Stage (III-IV)	Positive	Negative
175	2017	2016-2020	58	51-60	>45 (Old patient)	Male	Tongue	Yes	Tidak Berdiferensiasi	10	9-12 (Grade II, Moderate)	Resection	T4	N1	M0	T4cN1M0	Stage IVA	Advanced Stage (III-IV)	Positive	Negative
176	2017	2016-2020	76	71-80	>45 (Old patient)	Male	Tongue	Yes	Well	7	4-8 (Grade I, Good)	Resection	T4	N2	M0	T4aN2bM0	Stage IVA	Advanced Stage (III-IV)	Positive	Negative
177	2017	2016-2020	30	21-30	<=45 (Young patient)	Male	Tongue	Yes	Well	8	4-8 (Grade I, Good)	Resection	T4	N2	M0	T4aN2M0	Stage IVA	Advanced Stage (III-IV)	Negative	Negative
178	2017	2016-2020	63	61-70	>45 (Old patient)	Male	Tongue	Yes	Moderate	8	4-8 (Grade I, Good)	Resection	T4	N1	M0	T4N1M0	Stage IVA	Advanced Stage (III-IV)	Positive	Negative
179	2017	2016-2020	56	51-60	>45 (Old patient)	Male	Tongue	Yes	Well	8	4-8 (Grade I, Good)	Resection	T1	N0	M0	T1N0M0	Stage I	Early Stage (I-II)	Positive	Negative
180	2017	2016-2020	44	41-50	<=45 (Young patient)	Male	Lip	Yes	Well	10	9-12 (Grade II, Moderate)	Resection	T4	N1	M0	T4N1M0	Stage IVA	Advanced Stage (III-IV)	Positive	Negative
181	2017	2016-2020	77	71-80	>45 (Old patient)	Female	Mouth Non-specific	Yes	Well	7	4-8 (Grade I, Good)	Resection	T2	N0	M0	T2N0M0	Stage II	Early Stage (I-II)	Negative	Negative
182	2017	2016-2020	55	51-60	>45 (Old patient)	Male	Tongue	Yes	Well	7	4-8 (Grade I, Good)	Resection	T4	N2	M0	T4aN2bM0	Stage IVA	Advanced Stage (III-IV)	Positive	Negative
183	2017	2016-2020	61	61-70	>45 (Old patient)	Female	Mouth Non-specific	Yes	Poor	10	9-12 (Grade II, Moderate)	Resection	T4	N2	M0	T4aN2M0	Stage IVA	Advanced Stage (III-IV)	Positive	Positive
184	2017	2016-2020	55	51-60	>45 (Old patient)	Female	Tongue	Yes	Well	9	9-12 (Grade II, Moderate)	Resection	T1	N0	M0	T1N0M0	Stage I	Early Stage (I-II)	Negative	Negative
185	2017	2016-2020	54	51-60	>45 (Old patient)	Female	Tongue	Yes	Well	7	4-8 (Grade I, Good)	Resection	T2	N0	M0	T2N0M0	Stage II	Early Stage (I-II)	Negative	Negative
186	2017	2016-2020	44	41-50	<=45 (Young patient)	Male	Tongue	Yes	Well	7	4-8 (Grade I, Good)	Resection	T2	N0	M0	T2N0M0	Stage II	Early Stage (I-II)	Negative	Negative
187	2017	2016-2020	42	41-50	<=45 (Young patient)	Female	Tongue	Yes	Moderate	11	9-12 (Grade II, Moderate)	Resection	NA	NA	NA	NA	NA	NA	Negative	Negative
188	2017	2016-2020	54	51-60	>45 (Old patient)	Female	Mouth Non-specific	No	Poor	12	9-12 (Grade II, Moderate)	Resection	T3	N1	M0	T3N1M0	Stage III	Advanced Stage (III-IV)	Positive	Negative
189	2017	2016-2020	77	71-80	>45 (Old patient)	Female	Mouth Non-specific	Yes	Well	6	4-8 (Grade I, Good)	Resection	T4	N2	M0	T4aN2bM0	Stage IVA	Advanced Stage (III-IV)	Negative	Positive
190	2017	2016-2020	42	41-50	<=45 (Young patient)	Female	Tongue	Yes	Well	12	9-12 (Grade II, Moderate)	Resection	T4	N0	M0	T4aN3M0	Stage IVA	Advanced Stage (III-IV)	Positive	Positive
191	2017	2016-2020	35	31-40	<=45 (Young patient)	Male	Tongue	Yes	Poor	11	9-12 (Grade II, Moderate)	Resection	T4	N1	M0	T4aN1M0	Stage IVA	Advanced Stage (III-IV)	Positive	Positive
192	2017	2016-2020	53	51-60	>45 (Old patient)	Female	Tongue	Yes	Well	12	9-12 (Grade II, Moderate)	Resection	NA	NA	NA	NA	NA	NA	Negative	Positive
193	2017	2016-2020	70	61-70	>45 (Old patient)	Female	Tongue	Yes	Moderate	8	4-8 (Grade I, Good)	Resection	T4	N2	M0	T4bN2aM0	Stage IVB	Advanced Stage (III-IV)	Positive	Negative
194	2017	2016-2020	66	61-70	>45 (Old patient)	Male	Tongue	Yes	Well	6	4-8 (Grade I, Good)	Resection	T4	N2	M0	T4aN2bM0	Stage IVA	Advanced Stage (III-IV)	Positive	Negative
195	2016	2016-2020	76	71-80	>45 (Old patient)	Female	Mouth Non-specific	Yes	Well	8	4-8 (Grade I, Good)	Resection	NA	NA	NA	NA	NA	NA	Negative	Positive
196	2016	2016-2020	34	31-40	<=45 (Young patient)	Female	Tongue	Yes	Tidak Berdiferensiasi	7	4-8 (Grade I, Good)	Resection	T4	N0	M0	T4aN0M0	Stage IVA	Advanced Stage (III-IV)	Negative	Negative
197	2016	2016-2020	52	51-60	>45 (Old patient)	Male	Tongue	No	Moderate	10	9-12 (Grade II, Moderate)	Resection	T4	N2	M0	T4aN2M0	Stage IVA	Advanced Stage (III-IV)	Positive	Negative
198	2016	2016-2020	59	51-60	>45 (Old patient)	Female	Tongue	Yes	Well	8	4-8 (Grade I, Good)	Resection	T3	N0	M0	T3N0M0	Stage III	Advanced Stage (III-IV)	Negative	Negative
199	2016	2016-2020	73	71-80	>45 (Old patient)	Female	Mouth Non-specific	Yes	Well	12	9-12 (Grade II, Moderate)	Resection	T2	N1	M0	T2N1M0	Stage III	Advanced Stage (III-IV)	Positive	Positive
200	2016	2016-2020	62	61-70	>45 (Old patient)	Male	Tongue	No	Tidak Berdiferensiasi	13	13-16 (Grade III, Poor)	Resection	T4	N2	M0	T4aN2M0	Stage IVA	Advanced Stage (III-IV)	Negative	Negative
201	2016	2016-2020	47	41-50	>45 (Old patient)	Female	Tongue	Yes	Tidak Berdiferensiasi	9	9-12 (Grade II, Moderate)	Resection	T4	N1	M0	T4aN1M0	Stage IVA	Advanced Stage (III-IV)	Negative	Negative
202	2016	2016-2020	56	51-60	>45 (Old patient)	Female	Tongue	Yes	Well	6	4-8 (Grade I, Good)	Resection	NA	NA	NA	NA	NA	NA	Negative	Negative
203	2016	2016-2020	88	>80	>45 (Old patient)	Female	Mouth Non-specific	Yes	Well	8	4-8 (Grade I, Good)	Resection	NA	NA	NA	NA	NA	NA	Positive	Negative
204	2016	2016-2020	48	41-50	>45 (Old patient)	Male	Tongue	Yes	Well	9	9-12 (Grade II, Moderate)	Resection	T4	N2	M0	T4N2M0	Stage IVA	Advanced Stage (III-IV)	Positive	Negative
205	2016	2016-2020	46	41-50	>45 (Old patient)	Female	Tongue	Yes	Tidak Berdiferensiasi	12	9-12 (Grade II, Moderate)	Resection	T4	N0	M0	T4N0M0	Stage IVA	Advanced Stage (III-IV)	Positive	Negative
206	2016	2016-2020	53	51-60	>45 (Old patient)	Female	Tongue	Yes	Tidak Berdiferensiasi	13	13-16 (Grade III, Poor)	Resection	T3	N0	M0	T3N0M0	Stage III	Advanced Stage (III-IV)	Negative	Negative
207	2016	2016-2020	53	51-60	>45 (Old patient)	Male	Tongue	Yes	Well	11	9-12 (Grade II, Moderate)	Resection	T4	N1	M0	T4N1M0	Stage IVA	Advanced Stage (III-IV)	Positive	Negative
208	2016	2016-2020	52	51-60	>45 (Old patient)	Male	Tongue	No	Poor	13	13-16 (Grade III, Poor)	Resection	T4	N1	M0	T4N1M0	Stage IVA	Advanced Stage (III-IV)	Negative	Negative
209	2016	2016-2020	53	51-60	>45 (Old patient)	Male	Tongue	Yes	Well	8	4-8 (Grade I, Good)	Resection	T3	N1	M1	T3N1M1	Stage IVC	Advanced Stage (III-IV)	Positive	Negative
210	2016	2016-2020	62	61-70	>45 (Old patient)	Male	Lip	Yes	Well	5	4-8 (Grade I, Good)	Resection	NA	NA	NA	NA	NA	NA	Negative	Negative
211	2016	2016-2020	45	41-50	<=45 (Young patient)	Female	Tongue	Yes	Well	8	4-8 (Grade I, Good)	Resection	T1	N0	M0	T1N1M0	Stage III	Advanced Stage (III-IV)	Positive	Negative
212	2016	2016-2020	63	61-70	>45 (Old patient)	Male	Tongue	No	Tidak Berdiferensiasi	10	9-12 (Grade II, Moderate)	Resection	T4	N1	M0	T4aN1M0	Stage IVA	Advanced Stage (III-IV)	Negative	Negative
213	2016	2016-2020	33	31-40	<=45 (Young patient)	Male	Tongue	Yes	Tidak Berdiferensiasi	7	4-8 (Grade I, Good)	Resection	T4	N2	M0	T4aN2bM0	Stage IVA	Advanced Stage (III-IV)	Positive	Negative
214	2015	2011-2015	53	51-60	>45 (Old patient)	Male	Palate	Yes	Well	8	4-8 (Grade I, Good)	Resection	T4	N1	M0	T4aN1M0	Stage IVA	Advanced Stage (III-IV)	Positive	Negative
215	2015	2011-2015	67	61-70	>45 (Old patient)	Male	Tongue	Yes	Tidak Berdiferensiasi	10	9-12 (Grade II, Moderate)	Resection	T2	N0	M0	T2N0M0	Stage II	Early Stage (I-II)	Negative	Negative
216	2015	2011-2015	55	51-60	>45 (Old patient)	Female	Mouth Non-specific	No	Moderate	13	13-16 (Grade III, Poor)	Resection	T4	N1	M0	T4N1M0	Stage IVA	Advanced Stage (III-IV)	Positive	Negative
217	2015	2011-2015	72	71-80	>45 (Old patient)	Male	Lip	Yes	Well	8	4-8 (Grade I, Good)	Resection	T4	N1	M0	T4N1M0	Stage IVA	Advanced Stage (III-IV)	Negative	Negative
218	2015	2011-2015	45	41-50	<=45 (Young patient)	Female	Tongue	Yes	Well	8	4-8 (Grade I, Good)	Resection	T3	N1	M1	T3N1M1	Stage IVC	Advanced Stage (III-IV)	Positive	Negative
219	2015	2011-2015	46	41-50	>45 (Old patient)	Male	Palate	Yes	Moderate	13	13-16 (Grade III, Poor)	Resection	NA	NA	NA	NA	NA	NA	Negative	Positive
220	2015	2011-2015	58	51-60	>45 (Old patient)	Female	Tongue	Yes	Tidak Berdiferensiasi	9	9-12 (Grade II, Moderate)	Resection	T2	N0	M0	T2N0M0	Stage II	Early Stage (I-II)	Negative	Negative
221	2015	2011-2015	41	41-50	<=45 (Young patient)	Female	Palate	Yes	Well	8	4-8 (Grade I, Good)	Resection	T4	N0	M0	T4N0M0	Stage IVA	Advanced Stage (III-IV)	Negative	Positive
222	2015	2011-2015	67	61-70	>45 (Old patient)	Female	Tongue	No	Moderate	11	9-12 (Grade II, Moderate)	Resection	T2	N0	M0	T2N0M0	Stage II	Early Stage (I-II)	Negative	Negative
223	2015	2011-2015	43	41-50	<=45 (Young patient)	Male	Tongue	No	Tidak Berdiferensiasi	10	9-12 (Grade II, Moderate)	Resection	T4	N0	M0	T4N0M0	Stage IVA	Advanced Stage (III-IV)	Negative	Negative
224	2015	2011-2015	45	41-50	<=45 (Young patient)	Male	Mouth Non-specific	Yes	Poor	10	9-12 (Grade II, Moderate)	Resection	T4	N1	M0	T4N1M0	Stage IVA	Advanced Stage (III-IV)	Negative	Negative
225	2015	2011-2015	46	41-50	>45 (Old patient)	Female	Tongue	Yes	Well	10	9-12 (Grade II, Moderate)	Resection	T4	N2	M0	T4aN2M0	Stage IVA	Advanced Stage (III-IV)	Positive	Negative
226	2015	2011-2015	44	41-50	<=45 (Young patient)	Female	Tongue	Yes	Tidak Berdiferensiasi	9	9-12 (Grade II, Moderate)	Resection	T4	N0	M0	T4N0M0	Stage IVA	Advanced Stage (III-IV)	Positive	Negative
227	2015	2011-2015	48	41-50	>45 (Old patient)	Male	Tongue	Yes	Tidak Berdiferensiasi	11	9-12 (Grade II, Moderate)	Resection	T2	N1	M0	T2N1M0	Stage III	Advanced Stage (III-IV)	Positive	Negative
228	2015	2011-2015	62	61-70	>45 (Old patient)	Male	Palate	Yes	Well	9	9-12 (Grade II, Moderate)	Resection	T4	N0	M0	T4aN0M0	Stage IVA	Advanced Stage (III-IV)	Positive	Positive
229	2015	2011-2015	61	61-70	>45 (Old patient)	Male	Tongue	No	Moderate	8	4-8 (Grade I, Good)	Resection	T3	N0	M0	T3N0M0	Stage III	Advanced Stage (III-IV)	Negative	Negative
230	2015	2011-2015	43	41-50	<=45 (Young patient)	Male	Palate	Yes	Well	5	4-8 (Grade I, Good)	Resection	T4	N0	M0	T4N0M0	Stage IVA	Advanced Stage (III-IV)	Negative	Positive
231	2015	2011-2015	62	61-70	>45 (Old patient)	Female	Tongue	Yes	Tidak Berdiferensiasi	12	9-12 (Grade II, Moderate)	Resection	T4	N0	M0	T4aN0M0	Stage IVA	Advanced Stage (III-IV)	Positive	Negative
232	2015	2011-2015	63	61-70	>45 (Old patient)	Male	Mouth Non-specific	Yes	Well	10	9-12 (Grade II, Moderate)	Resection	T3	N2	M0	T3N2M0	Stage IVA	Advanced Stage (III-IV)	Positive	Negative
233	2015	2011-2015	55	51-60	>45 (Old patient)	Male	Tongue	Yes	Moderate	13	13-16 (Grade III, Poor)	Resection	T2	N1	M0	T2N1M0	Stage III	Advanced Stage (III-IV)	Positive	Negative
234	2015	2011-2015	67	61-70	>45 (Old patient)	Female	Mouth Non-specific	Yes	Well	13	13-16 (Grade III, Poor)	Resection	T4	N2	M0	T4aN2bM0	Stage IVA	Advanced Stage (III-IV)	Positive	Negative
235	2015	2011-2015	44	41-50	<=45 (Young patient)	Female	Tongue	Yes	Tidak Berdiferensiasi	11	9-12 (Grade II, Moderate)	Resection	T3	N1	M0	T3N1M0	Stage III	Advanced Stage (III-IV)	Positive	Negative
236	2015	2011-2015	39	31-40	<=45 (Young patient)	Female	Tongue	Yes	Tidak Berdiferensiasi	9	9-12 (Grade II, Moderate)	Resection	T4	N2	M0	T4aN3M0	Stage IVB	Advanced Stage (III-IV)	Positive	Negative
237	2015	2011-2015	47	41-50	>45 (Old patient)	Male	Tongue	Yes	Tidak Berdiferensiasi	13	13-16 (Grade III, Poor)	Resection	T4	N2	M0	T4aN3M0	Stage IVB	Advanced Stage (III-IV)	Positive	Negative
238	2015	2011-2015	27	21-30	<=45 (Young patient)	Female	Tongue	Yes	Well	11	9-12 (Grade II, Moderate)	Resection	T4	N1	M0	T4aN1M0	Stage IVA	Advanced Stage (III-IV)	Positive	Negative
239	2015	2011-2015	37	31-40	<=45 (Young patient)	Male	Palate	Yes	Well	6	4-8 (Grade I, Good)	Resection	T3	N0	M0	T3N0M0	Stage III	Advanced Stage (III-IV)	Negative	Negative
240	2015	2011-2015	44	41-50	<=45 (Young patient)	Male	Gingiva	Yes	Well	9	9-12 (Grade II, Moderate)	Resection	T4	N2	M0	T4N2M0	Stage IVA	Advanced Stage (III-IV)	Positive	Positive
241	2015	2011-2015	53	51-60	>45 (Old patient)	Female	Tongue	Yes	Tidak Berdiferensiasi	11	9-12 (Grade II, Moderate)	Resection	T4	N0	M0	T4aN0M0	Stage IVA	Advanced Stage (III-IV)	Negative	Positive
242	2015	2011-2015	46	41-50	>45 (Old patient)	Male	Palate	Yes	Well	8	4-8 (Grade I, Good)	Resection	NA	NA	NA	NA	NA	NA	Negative	Positive
243	2015	2011-2015	48	41-50	>45 (Old patient)	Female	Mouth Non-specific	Yes	Moderate	9	9-12 (Grade II, Moderate)	Resection	T4	N2	M0	T4N2M0	Stage IVA	Advanced Stage (III-IV)	Positive	Negative
244	2014	2011-2015	42	41-50	<=45 (Young patient)	Female	Tongue	Yes	Tidak Berdiferensiasi	13	13-16 (Grade III, Poor)	Resection	NA	NA	NA	NA	NA	NA	Positive	Negative
245	2014	2011-2015	38	31-40	<=45 (Young patient)	Female	Tongue	Yes	Tidak Berdiferensiasi	13	13-16 (Grade III, Poor)	Resection	T4	N1	M0	T4aN1M0	Stage IVA	Advanced Stage (III-IV)	Positive	Positive
246	2014	2011-2015	24	21-30	<=45 (Young patient)	Female	Tongue	No	Tidak Berdiferensiasi	10	9-12 (Grade II, Moderate)	Resection	T4	N1	M0	T4N1M0	Stage IVA	Advanced Stage (III-IV)	Positive	Negative
247	2014	2011-2015	41	41-50	<=45 (Young patient)	Male	Mouth Non-specific	Yes	Well	8	4-8 (Grade I, Good)	Resection	T3	N0	M0	T3N0M0	Stage III	Advanced Stage (III-IV)	Negative	Negative
248	2014	2011-2015	52	51-60	>45 (Old patient)	Male	Tongue	Yes	Well	7	4-8 (Grade I, Good)	Resection	T3	N1	M0	T3N1M0	Stage III	Advanced Stage (III-IV)	Positive	Negative
249	2014	2011-2015	32	31-40	<=45 (Young patient)	Male	Tongue	Yes	Tidak Berdiferensiasi	10	9-12 (Grade II, Moderate)	Resection	T4	N2	M0	T4aN2M0	Stage IVA	Advanced Stage (III-IV)	Positive	Negative
250	2014	2011-2015	57	51-60	>45 (Old patient)	Female	Tongue	Yes	Moderate	11	9-12 (Grade II, Moderate)	Resection	NA	NA	NA	NA	NA	NA	Positive	Negative
251	2014	2011-2015	40	31-40	<=45 (Young patient)	Female	Tongue	Yes	Well	7	4-8 (Grade I, Good)	Resection	T1	N0	M0	T1N2M0	Stage IVA	Advanced Stage (III-IV)	Positive	Negative
252	2014	2011-2015	62	61-70	>45 (Old patient)	Male	Tongue	Yes	Well	8	4-8 (Grade I, Good)	Resection	NA	NA	NA	NA	NA	NA	Positive	Negative
253	2014	2011-2015	36	31-40	<=45 (Young patient)	Male	Tongue	No	Poor	13	13-16 (Grade III, Poor)	Resection	T4	N0	M0	T4N0M0	Stage IVA	Advanced Stage (III-IV)	Negative	Negative
254	2014	2011-2015	56	51-60	>45 (Old patient)	Male	Mouth Non-specific	Yes	Tidak Berdiferensiasi	5	4-8 (Grade I, Good)	Resection	T4	N1	M0	T4aN1M0	Stage IVA	Advanced Stage (III-IV)	Positive	Negative
255	2014	2011-2015	28	21-30	<=45 (Young patient)	Male	Mouth Non-specific	Yes	Well	6	4-8 (Grade I, Good)	Resection	T4	N1	M0	T4N1M0	Stage IVA	Advanced Stage (III-IV)	Positive	Negative
256	2014	2011-2015	26	21-30	<=45 (Young patient)	Male	Gingiva	Yes	Poor	11	9-12 (Grade II, Moderate)	Resection	T4	N1	M0	T4aN1M0	Stage IVA	Advanced Stage (III-IV)	Positive	Negative
257	2014	2011-2015	52	51-60	>45 (Old patient)	Female	Tongue	Yes	Tidak Berdiferensiasi	7	4-8 (Grade I, Good)	Resection	T2	N2	M0	T2N2M0	Stage IVA	Advanced Stage (III-IV)	Negative	Negative
258	2013	2011-2015	66	61-70	>45 (Old patient)	Female	Tongue	No	Moderate	8	4-8 (Grade I, Good)	Resection	T3	N0	M0	T3N0M0	Stage III	Advanced Stage (III-IV)	Negative	Negative
259	2013	2011-2015	57	51-60	>45 (Old patient)	Male	Tongue	Yes	Well	8	4-8 (Grade I, Good)	Resection	T2	N0	M0	T2N0M0	Stage II	Early Stage (I-II)	Negative	Negative
260	2013	2011-2015	53	51-60	>45 (Old patient)	Female	Gingiva	Yes	Well	6	4-8 (Grade I, Good)	Resection	T4	N0	M0	T4N0M0	Stage IVA	Advanced Stage (III-IV)	Negative	Positive
261	2013	2011-2015	26	21-30	<=45 (Young patient)	Male	Gingiva	Yes	Well	7	4-8 (Grade I, Good)	Resection	T4	N1	M0	T4aN1M0	Stage IVA	Advanced Stage (III-IV)	Negative	Negative
262	2013	2011-2015	53	51-60	>45 (Old patient)	Female	Tongue	Yes	Tidak Berdiferensiasi	6	4-8 (Grade I, Good)	Resection	T4	N1	M0	T4N1M0	Stage IVA	Advanced Stage (III-IV)	Positive	Negative
263	2013	2011-2015	45	41-50	<=45 (Young patient)	Male	Mouth Non-specific	Yes	Tidak Berdiferensiasi	10	9-12 (Grade II, Moderate)	Resection	T4	N2	M0	T4N2bM0	Stage IVA	Advanced Stage (III-IV)	Positive	Negative
264	2013	2011-2015	35	31-40	<=45 (Young patient)	Male	Lip	Yes	Tidak Berdiferensiasi	8	4-8 (Grade I, Good)	Resection	NA	NA	NA	NA	NA	NA	Negative	Negative
265	2013	2011-2015	55	51-60	>45 (Old patient)	Female	Lip	Yes	Well	6	4-8 (Grade I, Good)	Resection	T1	N0	M0	T1N0M0	Stage I	Early Stage (I-II)	Negative	Negative
266	2013	2011-2015	58	51-60	>45 (Old patient)	Male	Tongue	Yes	Tidak Berdiferensiasi	13	13-16 (Grade III, Poor)	Resection	T4	N0	M0	T4aN0M0	Stage IVA	Advanced Stage (III-IV)	Positive	Negative
267	2013	2011-2015	55	51-60	>45 (Old patient)	Male	Tongue	Yes	Well	5	4-8 (Grade I, Good)	Resection	T4	N2	M0	T4N2M0	Stage IVA	Advanced Stage (III-IV)	Positive	Negative
268	2013	2011-2015	66	61-70	>45 (Old patient)	Male	Tongue	Yes	Well	8	4-8 (Grade I, Good)	Resection	T3	N2	M0	T3N2M0	Stage IVA	Advanced Stage (III-IV)	Positive	Negative
269	2013	2011-2015	42	41-50	<=45 (Young patient)	Female	Tongue	Yes	Well	13	13-16 (Grade III, Poor)	Resection	T4	N1	M0	T4N1M0	Stage IVA	Advanced Stage (III-IV)	Negative	Negative
270	2013	2011-2015	46	41-50	>45 (Old patient)	Female	Lip	Yes	Tidak Berdiferensiasi	4	4-8 (Grade I, Good)	Resection	T4	N1	M0	T4N1M0	Stage IVA	Advanced Stage (III-IV)	Negative	Negative
271	2013	2011-2015	50	41-50	>45 (Old patient)	Female	Tongue	Yes	Tidak Berdiferensiasi	13	13-16 (Grade III, Poor)	Resection	T4	N0	M0	T4aN3M0	Stage IVB	Advanced Stage (III-IV)	Positive	Negative
272	2013	2011-2015	57	51-60	>45 (Old patient)	Female	Tongue	No	Tidak Berdiferensiasi	12	9-12 (Grade II, Moderate)	Resection	T4	N1	M0	T4bN1M0	Stage IVB	Advanced Stage (III-IV)	Positive	Negative
273	2013	2011-2015	64	61-70	>45 (Old patient)	Female	Tongue	Yes	Tidak Berdiferensiasi	5	4-8 (Grade I, Good)	Resection	NA	NA	NA	NA	NA	NA	Negative	Negative
274	2013	2011-2015	56	51-60	>45 (Old patient)	Male	Tongue	Yes	Tidak Berdiferensiasi	10	9-12 (Grade II, Moderate)	Resection	T4	N2	M0	T4aN2M0	Stage IVA	Advanced Stage (III-IV)	Positive	Negative
275	2013	2011-2015	24	21-30	<=45 (Young patient)	Female	Tongue	No	Tidak Berdiferensiasi	13	13-16 (Grade III, Poor)	Resection	T2	N0	M0	T2N0M0	Stage II	Early Stage (I-II)	Negative	Negative
276	2013	2011-2015	43	41-50	<=45 (Young patient)	Male	Palate	Yes	Well	6	4-8 (Grade I, Good)	Resection	T3	N0	M0	T3N0M0	Stage III	Advanced Stage (III-IV)	Negative	Negative
277	2013	2011-2015	62	61-70	>45 (Old patient)	Female	Tongue	No	Tidak Berdiferensiasi	7	4-8 (Grade I, Good)	Resection	T2	N0	M0	T2N0M0	Stage II	Early Stage (I-II)	Positive	Negative
278	2012	2011-2015	67	61-70	>45 (Old patient)	Male	Tongue	Yes	Poor	10	9-12 (Grade II, Moderate)	Resection	NA	NA	NA	NA	NA	NA	Positive	Negative
279	2012	2011-2015	42	41-50	<=45 (Young patient)	Male	Palate	Yes	Well	8	4-8 (Grade I, Good)	Resection	T3	N0	M0	T3N0M0	Stage III	Advanced Stage (III-IV)	Negative	Negative
280	2012	2011-2015	52	51-60	>45 (Old patient)	Male	Tongue	Yes	Tidak Berdiferensiasi	7	4-8 (Grade I, Good)	Resection	T2	N0	M0	T2N0M0	Stage II	Early Stage (I-II)	Negative	Negative
281	2012	2011-2015	61	61-70	>45 (Old patient)	Male	Tongue	Yes	Tidak Berdiferensiasi	13	13-16 (Grade III, Poor)	Resection	T4	N2	M0	T4aN2bM0	Stage IVA	Advanced Stage (III-IV)	Negative	Positive
282	2012	2011-2015	87	>80	>45 (Old patient)	Female	Lip	Yes	Well	13	13-16 (Grade III, Poor)	Resection	T4	N0	M0	T4N0M0	Stage IVA	Advanced Stage (III-IV)	Positive	Negative
283	2012	2011-2015	68	61-70	>45 (Old patient)	Female	Tongue	Yes	Well	8	4-8 (Grade I, Good)	Resection	T4	N0	M0	T4aN0M0	Stage IVA	Advanced Stage (III-IV)	Negative	Positive
284	2012	2011-2015	70	61-70	>45 (Old patient)	Male	Tongue	Yes	Tidak Berdiferensiasi	13	13-16 (Grade III, Poor)	Resection	T4	N2	M0	T4N2M0	Stage IVA	Advanced Stage (III-IV)	Positive	Negative
285	2012	2011-2015	44	41-50	<=45 (Young patient)	Male	Tongue	No	Tidak Berdiferensiasi	8	4-8 (Grade I, Good)	Resection	T3	N1	M0	T3N1M0	Stage III	Advanced Stage (III-IV)	Positive	Negative
286	2012	2011-2015	46	41-50	>45 (Old patient)	Male	Tongue	Yes	Tidak Berdiferensiasi	11	9-12 (Grade II, Moderate)	Resection	T2	N0	M0	T2N0M0	Stage II	Early Stage (I-II)	Negative	Negative
287	2012	2011-2015	59	51-60	>45 (Old patient)	Female	Tongue	Yes	Well	6	4-8 (Grade I, Good)	Resection	T4	N2	M0	T4aN2bM0	Stage IVA	Advanced Stage (III-IV)	Positive	Positive
288	2012	2011-2015	55	51-60	>45 (Old patient)	Male	Palate	Yes	Poor	8	4-8 (Grade I, Good)	Resection	T2	N1	M0	T2N1M0	Stage III	Advanced Stage (III-IV)	Positive	Negative
289	2012	2011-2015	99	>80	>45 (Old patient)	Male	Tongue	Yes	Tidak Berdiferensiasi	7	4-8 (Grade I, Good)	Resection	T3	N0	M0	T3N0M0	Stage III	Advanced Stage (III-IV)	Positive	Negative
290	2012	2011-2015	36	31-40	<=45 (Young patient)	Female	Tongue	Yes	Tidak Berdiferensiasi	7	4-8 (Grade I, Good)	Resection	T4	N1	M0	T4N1M0	Stage IVA	Advanced Stage (III-IV)	Positive	Negative
291	2012	2011-2015	52	51-60	>45 (Old patient)	Female	Mouth Non-specific	Yes	Tidak Berdiferensiasi	6	4-8 (Grade I, Good)	Resection	T2	N0	M0	T2N0M0	Stage II	Early Stage (I-II)	Negative	Negative
292	2012	2011-2015	51	51-60	>45 (Old patient)	Female	Tongue	Yes	Moderate	7	4-8 (Grade I, Good)	Resection	T2	N0	M0	T2N0M0	Stage II	Early Stage (I-II)	Negative	Negative
293	2011	2011-2015	64	61-70	>45 (Old patient)	Male	Tongue	Yes	Moderate	7	4-8 (Grade I, Good)	Resection	T4	N1	M0	T4N1M0	Stage IVA	Advanced Stage (III-IV)	Positive	Negative
294	2011	2011-2015	43	41-50	<=45 (Young patient)	Male	Palate	Yes	Well	13	13-16 (Grade III, Poor)	Resection	T4	N0	M0	T4N0M0	Stage IVA	Advanced Stage (III-IV)	Negative	Negative
295	2011	2011-2015	55	51-60	>45 (Old patient)	Female	Tongue	Yes	Well	7	4-8 (Grade I, Good)	Resection	T2	N0	M0	T2N0M0	Stage II	Early Stage (I-II)	Negative	Negative
296	2011	2011-2015	24	21-30	<=45 (Young patient)	Male	Tongue	Yes	Poor	13	13-16 (Grade III, Poor)	Resection	T3	N2	M0	T3N2M0	Stage IVA	Advanced Stage (III-IV)	Positive	Negative
297	2011	2011-2015	64	61-70	>45 (Old patient)	Female	Tongue	Non-specific	Moderate	6	4-8 (Grade I, Good)	Resection	NA	NA	NA	NA	NA	NA	Negative	Negative
298	2011	2011-2015	68	61-70	>45 (Old patient)	Male	Gingiva	Yes	Moderate	8	4-8 (Grade I, Good)	Resection	NA	NA	NA	NA	NA	NA	Positive	Negative
299	2011	2011-2015	99	>80	>45 (Old patient)	Female	Lip	No	Moderate	11	9-12 (Grade II, Moderate)	Resection	NA	NA	NA	NA	NA	NA	Negative	Negative
300	2011	2011-2015	52	51-60	>45 (Old patient)	Male	Tongue	Yes	Moderate	11	9-12 (Grade II, Moderate)	Resection	NA	NA	NA	NA	NA	NA	Negative	Negative
301	2010	2006-2010	67	61-70	>45 (Old patient)	Female	Tongue	Yes	Well	8	4-8 (Grade I, Good)	Resection	T1	N0	M0	T1N0M0	Stage I	Early Stage (I-II)	Positive	Negative
302	2010	2006-2010	68	61-70	>45 (Old patient)	Female	Tongue	Yes	Moderate	8	4-8 (Grade I, Good)	Resection	T2	N0	M0	T2N0M0	Stage II	Early Stage (I-II)	Negative	Negative
303	2010	2006-2010	33	31-40	<=45 (Young patient)	Male	Tongue	Yes	Tidak Berdiferensiasi	8	4-8 (Grade I, Good)	Resection	T1	N0	M0	T1N0M0	Stage I	Early Stage (I-II)	Negative	Negative
304	2010	2006-2010	34	31-40	<=45 (Young patient)	Male	Tongue	Yes	Moderate	8	4-8 (Grade I, Good)	Resection	T2	N0	M0	T2N0M0	Stage II	Early Stage (I-II)	Negative	Negative
305	2010	2006-2010	44	41-50	<=45 (Young patient)	Female	Tongue	Yes	Well	13	13-16 (Grade III, Poor)	Resection	T4	N1	M0	T4N1M0	Stage IVA	Advanced Stage (III-IV)	Positive	Positive
306	2010	2006-2010	36	31-40	<=45 (Young patient)	Female	Tongue	Yes	Tidak Berdiferensiasi	8	4-8 (Grade I, Good)	Resection	NA	NA	NA	NA	NA	NA	Negative	Negative
307	2010	2006-2010	36	31-40	<=45 (Young patient)	Male	Gingiva	Yes	Well	8	4-8 (Grade I, Good)	Resection	T2	N0	M0	T2N0M0	Stage II	Early Stage (I-II)	Negative	Negative
308	2010	2006-2010	67	61-70	>45 (Old patient)	Female	Tongue	Yes	Well	8	4-8 (Grade I, Good)	Resection	NA	NA	NA	NA	NA	NA	Negative	Negative
309	2010	2006-2010	41	41-50	<=45 (Young patient)	Male	Tongue	Yes	Well	13	13-16 (Grade III, Poor)	Resection	T4	N2	M0	T4N3M0	Stage IVB	Advanced Stage (III-IV)	Positive	Negative
310	2010	2006-2010	65	61-70	>45 (Old patient)	Male	Tongue	Yes	Well	8	4-8 (Grade I, Good)	Resection	T2	N0	M0	NA	Stage IVA	Advanced Stage (III-IV)	Negative	Negative
311	2010	2006-2010	74	71-80	>45 (Old patient)	Female	Mouth Non-specific	Yes	Well	7	4-8 (Grade I, Good)	Resection	NA	NA	NA	NA	NA	NA	Negative	Negative
312	2009	2006-2010	40	31-40	<=45 (Young patient)	Male	Tongue	Non-specific	Well	8	4-8 (Grade I, Good)	Biopsy	NA	NA	NA	NA	NA	NA	Negative	NA
313	2009	2006-2010	65	61-70	>45 (Old patient)	Male	Tongue	Yes	Well	NA	NA	Biopsy	NA	NA	NA	NA	NA	NA	NA	NA
314	2009	2006-2010	56	51-60	>45 (Old patient)	Female	Tongue	Yes	Well	NA	NA	Biopsy	NA	NA	NA	NA	NA	NA	NA	NA
315	2009	2006-2010	32	31-40	<=45 (Young patient)	Male	Tongue	Yes	Moderate	8	4-8 (Grade I, Good)	Biopsy	NA	NA	NA	NA	NA	NA	Negative	NA
316	2009	2006-2010	30	21-30	<=45 (Young patient)	Male	Tongue	Non-specific	Well	NA	NA	Biopsy	NA	NA	NA	NA	NA	NA	NA	NA
317	2009	2006-2010	39	31-40	<=45 (Young patient)	Male	Tongue	Non-specific	Well	8	4-8 (Grade I, Good)	Biopsy	NA	NA	NA	NA	NA	NA	Positive	NA
318	2009	2006-2010	47	41-50	>45 (Old patient)	Female	Tongue	Non-specific	Well	8	4-8 (Grade I, Good)	Biopsy	NA	NA	NA	NA	NA	NA	Negative	NA
319	2009	2006-2010	36	31-40	<=45 (Young patient)	Male	Tongue	Yes	Well	NA	NA	Biopsy	NA	NA	NA	NA	NA	NA	NA	NA
320	2009	2006-2010	34	31-40	<=45 (Young patient)	Female	Tongue	Yes	Moderate	NA	NA	Biopsy	NA	NA	NA	NA	NA	NA	NA	NA
321	2009	2006-2010	64	61-70	>45 (Old patient)	Female	Tongue	Yes	Poor	7	4-8 (Grade I, Good)	Biopsy	NA	NA	NA	NA	NA	NA	Positive	NA
322	2009	2006-2010	52	51-60	>45 (Old patient)	Male	Tongue	Yes	NA	NA	NA	Biopsy	NA	NA	NA	NA	NA	NA	NA	NA
323	2009	2006-2010	39	31-40	<=45 (Young patient)	Male	Palate	Yes	Moderate	8	4-8 (Grade I, Good)	Biopsy	NA	NA	NA	NA	NA	NA	Negative	NA
324	2009	2006-2010	45	41-50	<=45 (Young patient)	Male	Palate	No	Well	NA	NA	Biopsy	NA	NA	NA	NA	NA	NA	NA	NA
325	2009	2006-2010	57	51-60	>45 (Old patient)	Male	Tongue	Non-specific	Well	NA	NA	Biopsy	NA	NA	NA	NA	NA	NA	NA	NA
326	2009	2006-2010	64	61-70	>45 (Old patient)	Male	Mouth Non-specific	Yes	Well	8	4-8 (Grade I, Good)	Biopsy	NA	NA	NA	NA	NA	NA	Negative	NA
327	2009	2006-2010	34	31-40	<=45 (Young patient)	Female	Tongue	Yes	Well	NA	NA	Biopsy	NA	NA	NA	NA	NA	NA	NA	NA
328	2009	2006-2010	70	61-70	>45 (Old patient)	Female	Palate	Yes	Moderate	NA	NA	Biopsy	NA	NA	NA	NA	NA	NA	NA	NA
329	2009	2006-2010	42	41-50	<=45 (Young patient)	Male	Tongue	Yes	Moderate	NA	NA	Biopsy	NA	NA	NA	NA	NA	NA	NA	NA
330	2009	2006-2010	45	41-50	<=45 (Young patient)	Female	Tongue	Yes	Well	NA	NA	Biopsy	NA	NA	NA	NA	NA	NA	NA	NA
331	2009	2006-2010	28	21-30	<=45 (Young patient)	Female	Tongue	No	Well	8	4-8 (Grade I, Good)	Biopsy	NA	NA	NA	NA	NA	NA	Negative	NA
332	2009	2006-2010	64	61-70	>45 (Old patient)	Male	Tongue	No	Moderate	NA	NA	Biopsy	NA	NA	NA	NA	NA	NA	NA	NA
333	2009	2006-2010	58	51-60	>45 (Old patient)	Female	Tongue	Yes	Well	NA	NA	Biopsy	NA	NA	NA	NA	NA	NA	NA	NA
334	2009	2006-2010	60	51-60	>45 (Old patient)	Female	Mouth Non-specific	Yes	Well	8	4-8 (Grade I, Good)	Biopsy	NA	NA	NA	NA	NA	NA	Positive	NA
335	2009	2006-2010	51	51-60	>45 (Old patient)	Female	Tongue	No	Well	NA	NA	Biopsy	NA	NA	NA	NA	NA	NA	NA	NA
336	2009	2006-2010	57	51-60	>45 (Old patient)	Female	Tongue	Yes	Well	NA	NA	Biopsy	NA	NA	NA	NA	NA	NA	NA	NA
337	2009	2006-2010	68	61-70	>45 (Old patient)	Male	Palate	Yes	NA	NA	NA	Biopsy	NA	NA	NA	NA	NA	NA	NA	NA
338	2009	2006-2010	23	21-30	<=45 (Young patient)	Male	Tongue	Yes	Well	NA	NA	Biopsy	NA	NA	NA	NA	NA	NA	NA	NA
339	2009	2006-2010	56	51-60	>45 (Old patient)	Male	Tongue	No	Poor	8	4-8 (Grade I, Good)	Biopsy	NA	NA	NA	NA	NA	NA	Negative	NA
340	2009	2006-2010	40	31-40	<=45 (Young patient)	Male	Mouth Non-specific	Yes	Well	8	4-8 (Grade I, Good)	Biopsy	NA	NA	NA	NA	NA	NA	Positive	NA
341	2009	2006-2010	60	51-60	>45 (Old patient)	Male	Tongue	Yes	Moderate	NA	NA	Biopsy	NA	NA	NA	NA	NA	NA	NA	NA
342	2009	2006-2010	41	41-50	<=45 (Young patient)	Male	Palate	Yes	NA	NA	NA	Biopsy	NA	NA	NA	NA	NA	NA	NA	NA
343	2009	2006-2010	70	61-70	>45 (Old patient)	Male	Tongue	Yes	Well	NA	NA	Biopsy	NA	NA	NA	NA	NA	NA	NA	NA
344	2009	2006-2010	53	51-60	>45 (Old patient)	Female	Tongue	No	Well	8	4-8 (Grade I, Good)	Biopsy	NA	NA	NA	NA	NA	NA	Negative	NA
345	2009	2006-2010	71	71-80	>45 (Old patient)	Male	Palate	Yes	Well	8	4-8 (Grade I, Good)	Biopsy	NA	NA	NA	NA	NA	NA	Negative	NA
346	2009	2006-2010	64	61-70	>45 (Old patient)	Female	Mouth Non-specific	Yes	Poor	8	4-8 (Grade I, Good)	Biopsy	NA	NA	NA	NA	NA	NA	Negative	NA
347	2009	2006-2010	36	31-40	<=45 (Young patient)	Female	Tongue	No	Moderate	NA	NA	Biopsy	NA	NA	NA	NA	NA	NA	NA	NA
348	2009	2006-2010	46	41-50	>45 (Old patient)	Female	Gingiva	Yes	Moderate	8	4-8 (Grade I, Good)	Biopsy	NA	NA	NA	NA	NA	NA	Negative	NA
349	2009	2006-2010	48	41-50	>45 (Old patient)	Male	Tongue	Yes	Moderate	8	4-8 (Grade I, Good)	Biopsy	NA	NA	NA	NA	NA	NA	Negative	NA
350	2008	2006-2010	60	51-60	>45 (Old patient)	Male	Mouth Non-specific	Yes	Well	NA	NA	Biopsy	NA	NA	NA	NA	NA	NA	NA	NA
351	2008	2006-2010	51	51-60	>45 (Old patient)	Female	Tongue	Yes	NA	NA	NA	Biopsy	NA	NA	NA	NA	NA	NA	NA	NA
352	2008	2006-2010	54	51-60	>45 (Old patient)	Male	Mouth Non-specific	Yes	Moderate	NA	NA	Biopsy	NA	NA	NA	NA	NA	NA	NA	NA
353	2008	2006-2010	51	51-60	>45 (Old patient)	Female	Lip	Yes	Well	NA	NA	Biopsy	NA	NA	NA	NA	NA	NA	NA	NA
354	2008	2006-2010	28	21-30	<=45 (Young patient)	Female	Tongue	Yes	Well	NA	NA	Biopsy	NA	NA	NA	NA	NA	NA	NA	NA
355	2008	2006-2010	47	41-50	>45 (Old patient)	Female	Tongue	Yes	Well	NA	NA	Biopsy	NA	NA	NA	NA	NA	NA	NA	NA
356	2008	2006-2010	48	41-50	>45 (Old patient)	Female	Mouth Non-specific	Yes	Moderate	NA	NA	Biopsy	NA	NA	NA	NA	NA	NA	NA	NA
357	2008	2006-2010	23	21-30	<=45 (Young patient)	Male	Palate	Yes	Well	NA	NA	Biopsy	NA	NA	NA	NA	NA	NA	NA	NA
358	2008	2006-2010	63	61-70	>45 (Old patient)	Male	Mouth Non-specific	Yes	Well	NA	NA	Biopsy	NA	NA	NA	NA	NA	NA	NA	NA
359	2008	2006-2010	53	51-60	>45 (Old patient)	Female	Mouth Non-specific	No	Poor	NA	NA	Biopsy	NA	NA	NA	NA	NA	NA	NA	NA
360	2008	2006-2010	41	41-50	<=45 (Young patient)	Male	Lip	Yes	NA	NA	NA	Biopsy	NA	NA	NA	NA	NA	NA	NA	NA
361	2008	2006-2010	64	61-70	>45 (Old patient)	Male	Tongue	Yes	NA	NA	NA	Biopsy	NA	NA	NA	NA	NA	NA	NA	NA
362	2008	2006-2010	43	41-50	<=45 (Young patient)	Female	Tongue	No	NA	NA	NA	Biopsy	NA	NA	NA	NA	NA	NA	NA	NA
363	2008	2006-2010	44	41-50	<=45 (Young patient)	Male	Tongue	No	Well	7	4-8 (Grade I, Good)	Biopsy	NA	NA	NA	NA	NA	NA	NA	NA
364	2008	2006-2010	80	71-80	>45 (Old patient)	Female	Gingiva	No	NA	NA	NA	Biopsy	NA	NA	NA	NA	NA	NA	NA	NA
365	2008	2006-2010	63	61-70	>45 (Old patient)	Male	Tongue	Yes	Well	NA	NA	Biopsy	NA	NA	NA	NA	NA	NA	NA	NA
366	2008	2006-2010	66	61-70	>45 (Old patient)	Male	Mouth Non-specific	No	NA	NA	NA	Biopsy	NA	NA	NA	NA	NA	NA	NA	NA
367	2008	2006-2010	58	51-60	>45 (Old patient)	Male	Tongue	Yes	NA	NA	NA	Biopsy	NA	NA	NA	NA	NA	NA	NA	NA
368	2008	2006-2010	49	41-50	>45 (Old patient)	Male	Tongue	Yes	Well	NA	NA	Biopsy	NA	NA	NA	NA	NA	NA	NA	NA
369	2008	2006-2010	60	51-60	>45 (Old patient)	Female	Tongue	Yes	NA	NA	NA	Biopsy	NA	NA	NA	NA	NA	NA	NA	NA
370	2008	2006-2010	58	51-60	>45 (Old patient)	Female	Tongue	Yes	NA	NA	NA	Biopsy	NA	NA	NA	NA	NA	NA	NA	NA
371	2008	2006-2010	68	61-70	>45 (Old patient)	Female	Gingiva	Yes	NA	NA	NA	Biopsy	NA	NA	NA	NA	NA	NA	NA	NA
372	2008	2006-2010	52	51-60	>45 (Old patient)	Female	Palate	No	NA	NA	NA	Biopsy	NA	NA	NA	NA	NA	NA	NA	NA
373	2008	2006-2010	53	51-60	>45 (Old patient)	Male	Lip	No	Moderate	NA	NA	Biopsy	NA	NA	NA	NA	NA	NA	NA	NA
374	2008	2006-2010	34	31-40	<=45 (Young patient)	Male	Palate	No	NA	NA	NA	Biopsy	NA	NA	NA	NA	NA	NA	NA	NA
375	2008	2006-2010	20	11-20	<=45 (Young patient)	Female	Tongue	Yes	NA	NA	NA	Biopsy	NA	NA	NA	NA	NA	NA	NA	NA
376	2008	2006-2010	65	61-70	>45 (Old patient)	Male	Gingiva	Yes	NA	NA	NA	Biopsy	NA	NA	NA	NA	NA	NA	NA	NA
377	2008	2006-2010	52	51-60	>45 (Old patient)	Female	Lip	Yes	NA	NA	NA	Biopsy	NA	NA	NA	NA	NA	NA	NA	NA
378	2008	2006-2010	39	31-40	<=45 (Young patient)	Male	Palate	Yes	NA	NA	NA	Biopsy	NA	NA	NA	NA	NA	NA	NA	NA
379	2008	2006-2010	67	61-70	>45 (Old patient)	Female	Palate	Yes	NA	NA	NA	Biopsy	NA	NA	NA	NA	NA	NA	NA	NA
380	2008	2006-2010	39	31-40	<=45 (Young patient)	Female	Tongue	Yes	NA	NA	NA	Biopsy	NA	NA	NA	NA	NA	NA	NA	NA
381	2008	2006-2010	47	41-50	>45 (Old patient)	Female	Tongue	Yes	Well	7	4-8 (Grade I, Good)	Biopsy	NA	NA	NA	NA	NA	NA	NA	NA
382	2008	2006-2010	80	71-80	>45 (Old patient)	Female	Mouth Non-specific	Yes	NA	NA	NA	Biopsy	NA	NA	NA	NA	NA	NA	NA	NA
383	2008	2006-2010	70	61-70	>45 (Old patient)	Female	Mouth Non-specific	Yes	NA	NA	NA	Biopsy	NA	NA	NA	NA	NA	NA	NA	NA
384	2008	2006-2010	58	51-60	>45 (Old patient)	Male	Mouth Non-specific	Yes	NA	NA	NA	Biopsy	NA	NA	NA	NA	NA	NA	NA	NA
385	2008	2006-2010	85	>80	>45 (Old patient)	Male	Tongue	No	Well	NA	NA	Biopsy	NA	NA	NA	NA	NA	NA	NA	NA
386	2008	2006-2010	83	>80	>45 (Old patient)	Male	Mouth Non-specific	Yes	NA	NA	NA	Biopsy	NA	NA	NA	NA	NA	NA	NA	NA
387	2008	2006-2010	51	51-60	>45 (Old patient)	Female	Mouth Non-specific	Yes	NA	NA	NA	Biopsy	NA	NA	NA	NA	NA	NA	NA	NA
388	2008	2006-2010	36	31-40	<=45 (Young patient)	Male	Tongue	Yes	NA	NA	NA	Biopsy	NA	NA	NA	NA	NA	NA	NA	NA
389	2008	2006-2010	30	21-30	<=45 (Young patient)	Female	Tongue	No	NA	NA	NA	Biopsy	NA	NA	NA	NA	NA	NA	NA	NA
390	2008	2006-2010	49	41-50	>45 (Old patient)	Male	Tongue	Yes	NA	NA	NA	Biopsy	NA	NA	NA	NA	NA	NA	NA	NA
391	2008	2006-2010	22	21-30	<=45 (Young patient)	Female	Tongue	No	NA	NA	NA	Biopsy	NA	NA	NA	NA	NA	NA	NA	NA
392	2008	2006-2010	60	51-60	>45 (Old patient)	Male	Tongue	Yes	NA	NA	NA	Biopsy	NA	NA	NA	NA	NA	NA	NA	NA
393	2008	2006-2010	50	41-50	>45 (Old patient)	Male	Tongue	Non-specific	Well	7	4-8 (Grade I, Good)	Biopsy	NA	NA	NA	NA	NA	NA	NA	NA
394	2008	2006-2010	58	51-60	>45 (Old patient)	Female	Tongue	No	NA	NA	NA	Biopsy	NA	NA	NA	NA	NA	NA	NA	NA
395	2008	2006-2010	50	41-50	>45 (Old patient)	Female	Gingiva	Yes	NA	NA	NA	Biopsy	NA	NA	NA	NA	NA	NA	NA	NA
396	2008	2006-2010	45	41-50	<=45 (Young patient)	Male	Tongue	Yes	Well	NA	NA	Biopsy	NA	NA	NA	NA	NA	NA	NA	NA
397	2008	2006-2010	47	41-50	>45 (Old patient)	Female	Tongue	Yes	NA	NA	NA	Biopsy	NA	NA	NA	NA	NA	NA	NA	NA
398	2008	2006-2010	60	51-60	>45 (Old patient)	Female	Palate	No	NA	NA	NA	Biopsy	NA	NA	NA	NA	NA	NA	NA	NA
399	2008	2006-2010	52	51-60	>45 (Old patient)	Male	Mouth Non-specific	Non-specific	Well	NA	NA	Biopsy	NA	NA	NA	NA	NA	NA	NA	NA
400	2008	2006-2010	30	21-30	<=45 (Young patient)	Female	Tongue	Yes	NA	NA	NA	Biopsy	NA	NA	NA	NA	NA	NA	NA	NA
401	2008	2006-2010	52	51-60	>45 (Old patient)	Female	Tongue	Yes	NA	NA	NA	Biopsy	NA	NA	NA	NA	NA	NA	NA	NA
402	2007	2006-2010	30	21-30	<=45 (Young patient)	Female	Tongue	Yes	NA	NA	NA	Biopsy	NA	NA	NA	NA	NA	NA	NA	NA
403	2007	2006-2010	28	21-30	<=45 (Young patient)	Male	Tongue	Yes	NA	NA	NA	Biopsy	NA	NA	NA	NA	NA	NA	NA	NA
404	2007	2006-2010	50	41-50	>45 (Old patient)	Male	Tongue	Yes	NA	NA	NA	Biopsy	NA	NA	NA	NA	NA	NA	NA	NA
405	2007	2006-2010	25	21-30	<=45 (Young patient)	Female	Tongue	Yes	NA	NA	NA	Biopsy	NA	NA	NA	NA	NA	NA	NA	NA
406	2007	2006-2010	56	51-60	>45 (Old patient)	Female	Mouth Non-specific	Non-specific	NA	NA	NA	Biopsy	NA	NA	NA	NA	NA	NA	NA	NA
407	2007	2006-2010	52	51-60	>45 (Old patient)	Female	Tongue	Yes	NA	NA	NA	Biopsy	NA	NA	NA	NA	NA	NA	NA	NA
408	2007	2006-2010	51	51-60	>45 (Old patient)	Female	Mouth Non-specific	Yes	NA	NA	NA	Biopsy	NA	NA	NA	NA	NA	NA	NA	NA
409	2007	2006-2010	30	21-30	<=45 (Young patient)	Male	Lip	Yes	Well	NA	NA	Biopsy	NA	NA	NA	NA	NA	NA	NA	NA
410	2007	2006-2010	28	21-30	<=45 (Young patient)	Male	Tongue	Yes	NA	NA	NA	Biopsy	NA	NA	NA	NA	NA	NA	NA	NA
411	2007	2006-2010	46	41-50	>45 (Old patient)	Male	Gingiva	Yes	NA	NA	NA	Biopsy	NA	NA	NA	NA	NA	NA	NA	NA
412	2007	2006-2010	40	31-40	<=45 (Young patient)	Female	Tongue	Yes	Moderate	NA	NA	Biopsy	NA	NA	NA	NA	NA	NA	NA	NA
413	2007	2006-2010	50	41-50	>45 (Old patient)	Male	Tongue	Yes	NA	NA	NA	Biopsy	NA	NA	NA	NA	NA	NA	NA	NA
414	2007	2006-2010	55	51-60	>45 (Old patient)	Male	Tongue	Yes	NA	NA	NA	Biopsy	NA	NA	NA	NA	NA	NA	NA	NA
415	2007	2006-2010	34	31-40	<=45 (Young patient)	Male	Tongue	Yes	NA	NA	NA	Biopsy	NA	NA	NA	NA	NA	NA	NA	NA
416	2007	2006-2010	45	41-50	<=45 (Young patient)	Female	Tongue	Yes	NA	NA	NA	Biopsy	NA	NA	NA	NA	NA	NA	NA	NA
417	2007	2006-2010	43	41-50	<=45 (Young patient)	Male	Tongue	Yes	NA	NA	NA	Biopsy	NA	NA	NA	NA	NA	NA	NA	NA
418	2007	2006-2010	58	51-60	>45 (Old patient)	Female	Lip	Yes	NA	NA	NA	Biopsy	NA	NA	NA	NA	NA	NA	NA	NA
419	2007	2006-2010	70	61-70	>45 (Old patient)	Female	Lip	Yes	NA	NA	NA	Biopsy	NA	NA	NA	NA	NA	NA	NA	NA
420	2007	2006-2010	56	51-60	>45 (Old patient)	Female	Tongue	Yes	NA	NA	NA	Biopsy	NA	NA	NA	NA	NA	NA	NA	NA
421	2007	2006-2010	30	21-30	<=45 (Young patient)	Male	Lip	No	NA	NA	NA	Biopsy	NA	NA	NA	NA	NA	NA	NA	NA
422	2007	2006-2010	62	61-70	>45 (Old patient)	Female	Lip	Yes	NA	NA	NA	Biopsy	NA	NA	NA	NA	NA	NA	NA	NA
423	2007	2006-2010	71	71-80	>45 (Old patient)	Female	Gingiva	Non-specific	Well	NA	NA	Biopsy	NA	NA	NA	NA	NA	NA	NA	NA
424	2007	2006-2010	56	51-60	>45 (Old patient)	Female	Tongue	Yes	NA	NA	NA	Biopsy	NA	NA	NA	NA	NA	NA	NA	NA
425	2007	2006-2010	31	31-40	<=45 (Young patient)	Female	Tongue	Yes	Well	NA	NA	Biopsy	NA	NA	NA	NA	NA	NA	NA	NA
426	2007	2006-2010	63	61-70	>45 (Old patient)	Male	Tongue	No	NA	NA	NA	Biopsy	NA	NA	NA	NA	NA	NA	NA	NA
427	2007	2006-2010	42	41-50	<=45 (Young patient)	Male	Tongue	Yes	Well	NA	NA	Biopsy	NA	NA	NA	NA	NA	NA	NA	NA
428	2007	2006-2010	56	51-60	>45 (Old patient)	Female	Tongue	Non-specific	NA	NA	NA	Biopsy	NA	NA	NA	NA	NA	NA	NA	NA
429	2007	2006-2010	63	61-70	>45 (Old patient)	Male	Tongue	Yes	NA	NA	NA	Biopsy	NA	NA	NA	NA	NA	NA	NA	NA
430	2007	2006-2010	64	61-70	>45 (Old patient)	Female	Mouth Non-specific	Yes	NA	NA	NA	Biopsy	NA	NA	NA	NA	NA	NA	NA	NA
431	2007	2006-2010	53	51-60	>45 (Old patient)	Male	Tongue	Yes	NA	NA	NA	Biopsy	NA	NA	NA	NA	NA	NA	NA	NA
432	2007	2006-2010	66	61-70	>45 (Old patient)	Male	Palate	No	NA	NA	NA	Biopsy	NA	NA	NA	NA	NA	NA	NA	NA
433	2007	2006-2010	34	31-40	<=45 (Young patient)	Male	FOM	Yes	NA	NA	NA	Biopsy	NA	NA	NA	NA	NA	NA	NA	NA
434	2007	2006-2010	46	41-50	>45 (Old patient)	Female	Tongue	Yes	NA	NA	NA	Biopsy	NA	NA	NA	NA	NA	NA	NA	NA
435	2007	2006-2010	47	41-50	>45 (Old patient)	Male	Tongue	Yes	NA	NA	NA	Biopsy	NA	NA	NA	NA	NA	NA	NA	NA
436	2007	2006-2010	40	31-40	<=45 (Young patient)	Female	Tongue	Yes	Well	NA	NA	Biopsy	NA	NA	NA	NA	NA	NA	NA	NA
437	2007	2006-2010	62	61-70	>45 (Old patient)	Male	Palate	Yes	NA	NA	NA	Biopsy	NA	NA	NA	NA	NA	NA	NA	NA
438	2007	2006-2010	56	51-60	>45 (Old patient)	Male	Tongue	Yes	Moderate	NA	NA	Biopsy	NA	NA	NA	NA	NA	NA	NA	NA
439	2007	2006-2010	30	21-30	<=45 (Young patient)	Female	Gingiva	Yes	Well	NA	NA	Biopsy	NA	NA	NA	NA	NA	NA	NA	NA
440	2007	2006-2010	56	51-60	>45 (Old patient)	Male	Tongue	Yes	NA	NA	NA	Biopsy	NA	NA	NA	NA	NA	NA	NA	NA
441	2007	2006-2010	35	31-40	<=45 (Young patient)	Female	Tongue	Yes	Moderate	NA	NA	Biopsy	NA	NA	NA	NA	NA	NA	NA	NA
442	2007	2006-2010	50	41-50	>45 (Old patient)	Female	Tongue	Non-specific	Well	NA	NA	Biopsy	NA	NA	NA	NA	NA	NA	NA	NA
443	2007	2006-2010	53	51-60	>45 (Old patient)	Female	Tongue	Yes	NA	NA	NA	Biopsy	NA	NA	NA	NA	NA	NA	NA	NA
444	2007	2006-2010	64	61-70	>45 (Old patient)	Male	Gingiva	No	NA	NA	NA	Biopsy	NA	NA	NA	NA	NA	NA	NA	NA
445	2007	2006-2010	46	41-50	>45 (Old patient)	Male	Gingiva	Non-specific	Poor	NA	NA	Biopsy	NA	NA	NA	NA	NA	NA	NA	NA
446	2007	2006-2010	30	21-30	<=45 (Young patient)	Female	Tongue	No	NA	NA	NA	Biopsy	NA	NA	NA	NA	NA	NA	NA	NA
447	2007	2006-2010	67	61-70	>45 (Old patient)	Male	Palate	Yes	NA	NA	NA	Biopsy	NA	NA	NA	NA	NA	NA	NA	NA
448	2007	2006-2010	52	51-60	>45 (Old patient)	Female	Tongue	Yes	NA	8	4-8 (Grade I, Good)	Biopsy	NA	NA	NA	NA	NA	NA	Positive	NA
449	2007	2006-2010	61	61-70	>45 (Old patient)	Female	Tongue	Yes	NA	NA	NA	Biopsy	NA	NA	NA	NA	NA	NA	NA	NA
450	2007	2006-2010	78	71-80	>45 (Old patient)	Female	Palate	Yes	NA	NA	NA	Biopsy	NA	NA	NA	NA	NA	NA	NA	NA
451	2007	2006-2010	67	61-70	>45 (Old patient)	Female	Lip	Yes	NA	NA	NA	Biopsy	NA	NA	NA	NA	NA	NA	NA	NA
452	2007	2006-2010	64	61-70	>45 (Old patient)	Male	Gingiva	Yes	NA	NA	NA	Biopsy	NA	NA	NA	NA	NA	NA	NA	NA
453	2007	2006-2010	27	21-30	<=45 (Young patient)	Female	Tongue	Yes	NA	NA	NA	Biopsy	NA	NA	NA	NA	NA	NA	NA	NA
454	2007	2006-2010	57	51-60	>45 (Old patient)	Male	Tongue	Yes	Well	NA	NA	Biopsy	NA	NA	NA	NA	NA	NA	NA	NA
455	2007	2006-2010	54	51-60	>45 (Old patient)	Female	Tongue	Non-specific	Well	NA	NA	Biopsy	NA	NA	NA	NA	NA	NA	NA	NA
456	2007	2006-2010	63	61-70	>45 (Old patient)	Male	Palate	Non-specific	NA	NA	NA	Biopsy	NA	NA	NA	NA	NA	NA	NA	NA
457	2007	2006-2010	73	71-80	>45 (Old patient)	Female	Mouth Non-specific	No	NA	NA	NA	Biopsy	NA	NA	NA	NA	NA	NA	NA	NA
458	2007	2006-2010	23	21-30	<=45 (Young patient)	Female	Tongue	Yes	NA	8	4-8 (Grade I, Good)	Biopsy	NA	NA	NA	NA	NA	NA	Positive	NA
459	2007	2006-2010	34	31-40	<=45 (Young patient)	Female	Tongue	Yes	Well	NA	NA	Biopsy	NA	NA	NA	NA	NA	NA	NA	NA
460	2007	2006-2010	65	61-70	>45 (Old patient)	Male	Mouth Non-specific	Yes	NA	NA	NA	Biopsy	NA	NA	NA	NA	NA	NA	NA	NA
461	2007	2006-2010	44	41-50	<=45 (Young patient)	Male	Tongue	Yes	NA	NA	NA	Biopsy	NA	NA	NA	NA	NA	NA	NA	NA
462	2007	2006-2010	33	31-40	<=45 (Young patient)	Male	Tongue	Yes	Well	NA	NA	Biopsy	NA	NA	NA	NA	NA	NA	NA	NA
463	2006	2006-2010	54	51-60	>45 (Old patient)	Female	Tongue	Non-specific	Poor	NA	NA	Biopsy	NA	NA	NA	NA	NA	NA	NA	NA
464	2006	2006-2010	65	61-70	>45 (Old patient)	Male	Tongue	Yes	NA	NA	NA	Biopsy	NA	NA	NA	NA	NA	NA	NA	NA
465	2006	2006-2010	55	51-60	>45 (Old patient)	Female	Tongue	Yes	NA	NA	NA	Biopsy	NA	NA	NA	NA	NA	NA	NA	NA
466	2006	2006-2010	49	41-50	>45 (Old patient)	Female	Tongue	Yes	NA	NA	NA	Biopsy	NA	NA	NA	NA	NA	NA	NA	NA
467	2006	2006-2010	31	31-40	<=45 (Young patient)	Male	Tongue	Yes	Well	NA	NA	Biopsy	NA	NA	NA	NA	NA	NA	NA	NA
468	2006	2006-2010	52	51-60	>45 (Old patient)	Male	Tongue	Yes	NA	NA	NA	Biopsy	NA	NA	NA	NA	NA	NA	NA	NA
469	2006	2006-2010	33	31-40	<=45 (Young patient)	Female	Tongue	Yes	Poor	NA	NA	Biopsy	NA	NA	NA	NA	NA	NA	NA	NA
470	2006	2006-2010	20	11-20	<=45 (Young patient)	Female	Tongue	No	NA	NA	NA	Biopsy	NA	NA	NA	NA	NA	NA	NA	NA
471	2006	2006-2010	28	21-30	<=45 (Young patient)	Female	Tongue	Yes	NA	NA	NA	Biopsy	NA	NA	NA	NA	NA	NA	NA	NA
472	2006	2006-2010	53	51-60	>45 (Old patient)	Female	Tongue	Yes	NA	NA	NA	Biopsy	NA	NA	NA	NA	NA	NA	NA	NA
473	2006	2006-2010	35	31-40	<=45 (Young patient)	Female	FOM	No	NA	NA	NA	Biopsy	NA	NA	NA	NA	NA	NA	NA	NA
474	2006	2006-2010	73	71-80	>45 (Old patient)	Male	Lip	Yes	NA	NA	NA	Biopsy	NA	NA	NA	NA	NA	NA	NA	NA
475	2006	2006-2010	57	51-60	>45 (Old patient)	Male	Palate	Yes	Moderate	NA	NA	Biopsy	NA	NA	NA	NA	NA	NA	NA	NA
476	2006	2006-2010	57	51-60	>45 (Old patient)	Female	Tongue	No	Poor	NA	NA	Biopsy	NA	NA	NA	NA	NA	NA	NA	NA
477	2006	2006-2010	72	71-80	>45 (Old patient)	Male	Tongue	Yes	NA	NA	NA	Biopsy	NA	NA	NA	NA	NA	NA	NA	NA
478	2006	2006-2010	48	41-50	>45 (Old patient)	Male	Gingiva	No	Well	NA	NA	Biopsy	NA	NA	NA	NA	NA	NA	NA	NA
479	2006	2006-2010	33	31-40	<=45 (Young patient)	Male	Tongue	No	NA	NA	NA	Biopsy	NA	NA	NA	NA	NA	NA	NA	NA
480	2006	2006-2010	59	51-60	>45 (Old patient)	Male	Gingiva	Yes	NA	NA	NA	Biopsy	NA	NA	NA	NA	NA	NA	NA	NA
481	2006	2006-2010	50	41-50	>45 (Old patient)	Male	Tongue	No	NA	NA	NA	Biopsy	NA	NA	NA	NA	NA	NA	NA	NA
482	2006	2006-2010	25	21-30	<=45 (Young patient)	Female	Lip	No	NA	NA	NA	Biopsy	NA	NA	NA	NA	NA	NA	NA	NA
483	2006	2006-2010	45	41-50	<=45 (Young patient)	Male	Gingiva	No	NA	NA	NA	Biopsy	NA	NA	NA	NA	NA	NA	NA	NA
484	2006	2006-2010	37	31-40	<=45 (Young patient)	Male	Tongue	Yes	Moderate	NA	NA	Biopsy	NA	NA	NA	NA	NA	NA	NA	NA
485	2006	2006-2010	66	61-70	>45 (Old patient)	Male	Tongue	Yes	Well	NA	NA	Biopsy	NA	NA	NA	NA	NA	NA	NA	NA
486	2006	2006-2010	35	31-40	<=45 (Young patient)	Male	Tongue	No	NA	NA	NA	Biopsy	NA	NA	NA	NA	NA	NA	NA	NA
487	2006	2006-2010	57	51-60	>45 (Old patient)	Male	Mouth Non-specific	Non-specific	Moderate	NA	NA	Biopsy	NA	NA	NA	NA	NA	NA	NA	NA
488	2006	2006-2010	32	31-40	<=45 (Young patient)	Male	Tongue	Yes	NA	NA	NA	Biopsy	NA	NA	NA	NA	NA	NA	NA	NA
489	2006	2006-2010	43	41-50	<=45 (Young patient)	Female	Mouth Non-specific	Non-specific	NA	NA	NA	Biopsy	NA	NA	NA	NA	NA	NA	NA	NA
490	2006	2006-2010	67	61-70	>45 (Old patient)	Male	Tongue	Yes	NA	NA	NA	Biopsy	NA	NA	NA	NA	NA	NA	NA	NA
491	2006	2006-2010	46	41-50	>45 (Old patient)	Male	Mouth Non-specific	Yes	NA	NA	NA	Biopsy	NA	NA	NA	NA	NA	NA	NA	NA
492	2006	2006-2010	17	11-20	<=45 (Young patient)	Male	Tongue	Yes	NA	NA	NA	Biopsy	NA	NA	NA	NA	NA	NA	NA	NA
493	2006	2006-2010	31	31-40	<=45 (Young patient)	Male	Tongue	Yes	NA	NA	NA	Biopsy	NA	NA	NA	NA	NA	NA	NA	NA
494	2006	2006-2010	46	41-50	>45 (Old patient)	Male	Mouth Non-specific	No	NA	NA	NA	Biopsy	NA	NA	NA	NA	NA	NA	NA	NA
495	2006	2006-2010	49	41-50	>45 (Old patient)	Female	Tongue	Yes	NA	NA	NA	Biopsy	NA	NA	NA	NA	NA	NA	NA	NA
496	2006	2006-2010	51	51-60	>45 (Old patient)	Male	Mouth Non-specific	No	NA	NA	NA	Biopsy	NA	NA	NA	NA	NA	NA	NA	NA
497	2006	2006-2010	37	31-40	<=45 (Young patient)	Female	Tongue	Yes	Well	NA	NA	Biopsy	NA	NA	NA	NA	NA	NA	NA	NA
498	2006	2006-2010	43	41-50	<=45 (Young patient)	Female	Tongue	Yes	NA	NA	NA	Biopsy	NA	NA	NA	NA	NA	NA	NA	NA
499	2006	2006-2010	30	21-30	<=45 (Young patient)	Female	Tongue	Yes	NA	NA	NA	Biopsy	NA	NA	NA	NA	NA	NA	NA	NA
500	2006	2006-2010	56	51-60	>45 (Old patient)	Female	Gingiva	Yes	NA	NA	NA	Biopsy	NA	NA	NA	NA	NA	NA	NA	NA
501	2006	2006-2010	46	41-50	>45 (Old patient)	Male	Tongue	Yes	NA	NA	NA	Biopsy	NA	NA	NA	NA	NA	NA	NA	NA
502	2006	2006-2010	25	21-30	<=45 (Young patient)	Female	Tongue	Yes	NA	NA	NA	Biopsy	NA	NA	NA	NA	NA	NA	NA	NA
503	2006	2006-2010	35	31-40	<=45 (Young patient)	Male	Tongue	Yes	NA	NA	NA	Biopsy	NA	NA	NA	NA	NA	NA	NA	NA
504	2006	2006-2010	48	41-50	>45 (Old patient)	Female	Mouth Non-specific	Non-specific	Poor	NA	NA	Biopsy	NA	NA	NA	NA	NA	NA	NA	NA
505	2006	2006-2010	56	51-60	>45 (Old patient)	Male	Mouth Non-specific	Non-specific	Well	NA	NA	Biopsy	NA	NA	NA	NA	NA	NA	NA	NA
506	2006	2006-2010	57	51-60	>45 (Old patient)	Male	Mouth Non-specific	No	NA	NA	NA	Biopsy	NA	NA	NA	NA	NA	NA	NA	NA
507	2006	2006-2010	42	41-50	<=45 (Young patient)	Male	Tongue	Yes	NA	NA	NA	Biopsy	NA	NA	NA	NA	NA	NA	NA	NA
508	2006	2006-2010	55	51-60	>45 (Old patient)	Female	Tongue	Yes	NA	NA	NA	Biopsy	NA	NA	NA	NA	NA	NA	NA	NA
509	2006	2006-2010	61	61-70	>45 (Old patient)	Female	Tongue	Yes	Well	NA	NA	Biopsy	NA	NA	NA	NA	NA	NA	NA	NA
510	2006	2006-2010	72	71-80	>45 (Old patient)	Female	Tongue	Yes	NA	NA	NA	Biopsy	NA	NA	NA	NA	NA	NA	NA	NA
511	2005	2001-2005	56	51-60	>45 (Old patient)	Male	Mouth Non-specific	Yes	Moderate	NA	NA	Biopsy	NA	NA	NA	NA	NA	NA	NA	NA
512	2005	2001-2005	27	21-30	<=45 (Young patient)	Male	Mouth Non-specific	Yes	NA	NA	NA	Biopsy	NA	NA	NA	NA	NA	NA	NA	NA
513	2005	2001-2005	71	71-80	>45 (Old patient)	Male	Tongue	No	NA	NA	NA	Biopsy	NA	NA	NA	NA	NA	NA	NA	NA
514	2005	2001-2005	32	31-40	<=45 (Young patient)	Male	Tongue	Yes	NA	NA	NA	Biopsy	NA	NA	NA	NA	NA	NA	NA	NA
515	2005	2001-2005	36	31-40	<=45 (Young patient)	Female	Tongue	Non-specific	NA	NA	NA	Biopsy	NA	NA	NA	NA	NA	NA	NA	NA
516	2005	2001-2005	56	51-60	>45 (Old patient)	Male	Mouth Non-specific	Non-specific	NA	NA	NA	Biopsy	NA	NA	NA	NA	NA	NA	NA	NA
517	2005	2001-2005	47	41-50	>45 (Old patient)	Male	Tongue	Yes	NA	NA	NA	Biopsy	NA	NA	NA	NA	NA	NA	NA	NA
518	2005	2001-2005	45	41-50	<=45 (Young patient)	Male	Mouth Non-specific	Non-specific	Well	NA	NA	Biopsy	NA	NA	NA	NA	NA	NA	NA	NA
519	2005	2001-2005	51	51-60	>45 (Old patient)	Male	Tongue	Yes	NA	NA	NA	Biopsy	NA	NA	NA	NA	NA	NA	NA	NA
520	2005	2001-2005	99	>80	>45 (Old patient)	Male	Tongue	Yes	Well	NA	NA	Biopsy	NA	NA	NA	NA	NA	NA	NA	NA
521	2005	2001-2005	33	31-40	<=45 (Young patient)	Female	Tongue	Yes	Poor	NA	NA	Biopsy	NA	NA	NA	NA	NA	NA	NA	NA
522	2005	2001-2005	69	61-70	>45 (Old patient)	Female	Tongue	Yes	NA	NA	NA	Biopsy	NA	NA	NA	NA	NA	NA	NA	NA
523	2005	2001-2005	31	31-40	<=45 (Young patient)	Female	Tongue	Yes	NA	NA	NA	Biopsy	NA	NA	NA	NA	NA	NA	NA	NA
524	2005	2001-2005	99	>80	>45 (Old patient)	Male	Tongue	Yes	NA	NA	NA	Biopsy	NA	NA	NA	NA	NA	NA	NA	NA
525	2005	2001-2005	53	51-60	>45 (Old patient)	Female	Tongue	No	NA	NA	NA	Biopsy	NA	NA	NA	NA	NA	NA	NA	NA
526	2005	2001-2005	55	51-60	>45 (Old patient)	Female	Tongue	No	NA	NA	NA	Biopsy	NA	NA	NA	NA	NA	NA	NA	NA
527	2005	2001-2005	62	61-70	>45 (Old patient)	Female	Tongue	Yes	Moderate	NA	NA	Biopsy	NA	NA	NA	NA	NA	NA	NA	NA
528	2005	2001-2005	65	61-70	>45 (Old patient)	Male	Tongue	Yes	NA	NA	NA	Biopsy	NA	NA	NA	NA	NA	NA	NA	NA
529	2005	2001-2005	60	51-60	>45 (Old patient)	Male	Palate	Yes	NA	NA	NA	Biopsy	NA	NA	NA	NA	NA	NA	NA	NA
530	2005	2001-2005	47	41-50	>45 (Old patient)	Male	Mouth Non-specific	Yes	NA	NA	NA	Biopsy	NA	NA	NA	NA	NA	NA	NA	NA
531	2005	2001-2005	65	61-70	>45 (Old patient)	Male	Mouth Non-specific	No	NA	NA	NA	Biopsy	NA	NA	NA	NA	NA	NA	NA	NA
532	2005	2001-2005	35	31-40	<=45 (Young patient)	Male	Tongue	Yes	NA	NA	NA	Biopsy	NA	NA	NA	NA	NA	NA	NA	NA
533	2005	2001-2005	48	41-50	>45 (Old patient)	Female	Tongue	Yes	NA	NA	NA	Biopsy	NA	NA	NA	NA	NA	NA	NA	NA
534	2005	2001-2005	43	41-50	<=45 (Young patient)	Male	Mouth Non-specific	Non-specific	NA	NA	NA	Biopsy	NA	NA	NA	NA	NA	NA	NA	NA
535	2005	2001-2005	75	71-80	>45 (Old patient)	Male	Lip	Yes	Moderate	NA	NA	Biopsy	NA	NA	NA	NA	NA	NA	NA	NA
536	2005	2001-2005	67	61-70	>45 (Old patient)	Male	Lip	Yes	Moderate	NA	NA	Biopsy	NA	NA	NA	NA	NA	NA	NA	NA
537	2005	2001-2005	45	41-50	<=45 (Young patient)	Female	Tongue	Yes	Moderate	NA	NA	Biopsy	NA	NA	NA	NA	NA	NA	NA	NA
538	2005	2001-2005	99	>80	>45 (Old patient)	Female	Tongue	Yes	Well	NA	NA	Biopsy	NA	NA	NA	NA	NA	NA	NA	NA
539	2005	2001-2005	49	41-50	>45 (Old patient)	Male	Tongue	Yes	Moderate	NA	NA	Biopsy	NA	NA	NA	NA	NA	NA	NA	NA
540	2005	2001-2005	50	41-50	>45 (Old patient)	Female	Mouth Non-specific	Yes	Moderate	NA	NA	Biopsy	NA	NA	NA	NA	NA	NA	NA	NA
541	2005	2001-2005	43	41-50	<=45 (Young patient)	Male	Tongue	Yes	Well	NA	NA	Biopsy	NA	NA	NA	NA	NA	NA	NA	NA
542	2005	2001-2005	68	61-70	>45 (Old patient)	Male	Palate	Yes	Well	NA	NA	Biopsy	NA	NA	NA	NA	NA	NA	NA	NA
543	2005	2001-2005	28	21-30	<=45 (Young patient)	Male	Mouth Non-specific	No	Moderate	NA	NA	Biopsy	NA	NA	NA	NA	NA	NA	NA	NA
544	2005	2001-2005	40	31-40	<=45 (Young patient)	Male	Mouth Non-specific	Yes	NA	NA	NA	Biopsy	NA	NA	NA	NA	NA	NA	NA	NA
545	2005	2001-2005	53	51-60	>45 (Old patient)	Male	Tongue	Yes	NA	NA	NA	Biopsy	NA	NA	NA	NA	NA	NA	NA	NA
546	2005	2001-2005	38	31-40	<=45 (Young patient)	Female	Tongue	Non-specific	Poor	NA	NA	Biopsy	NA	NA	NA	NA	NA	NA	NA	NA
547	2005	2001-2005	35	31-40	<=45 (Young patient)	Female	Tongue	Yes	Well	NA	NA	Biopsy	NA	NA	NA	NA	NA	NA	NA	NA
548	2005	2001-2005	41	41-50	<=45 (Young patient)	Male	Tongue	Yes	Well	NA	NA	Biopsy	NA	NA	NA	NA	NA	NA	NA	NA
549	2005	2001-2005	50	41-50	>45 (Old patient)	Male	Gingiva	No	Moderate	NA	NA	Biopsy	NA	NA	NA	NA	NA	NA	NA	NA
550	2005	2001-2005	52	51-60	>45 (Old patient)	Female	Tongue	Yes	NA	NA	NA	Biopsy	NA	NA	NA	NA	NA	NA	NA	NA
551	2005	2001-2005	26	21-30	<=45 (Young patient)	Male	Tongue	Yes	NA	NA	NA	Biopsy	NA	NA	NA	NA	NA	NA	NA	NA
552	2005	2001-2005	55	51-60	>45 (Old patient)	Male	Mouth Non-specific	Yes	NA	NA	NA	Biopsy	NA	NA	NA	NA	NA	NA	NA	NA
553	2005	2001-2005	50	41-50	>45 (Old patient)	Male	Tongue	Yes	NA	NA	NA	Biopsy	NA	NA	NA	NA	NA	NA	NA	NA
554	2005	2001-2005	60	51-60	>45 (Old patient)	Male	Mouth Non-specific	No	NA	NA	NA	Biopsy	NA	NA	NA	NA	NA	NA	NA	NA
555	2005	2001-2005	65	61-70	>45 (Old patient)	Male	Mouth Non-specific	No	Well	NA	NA	Biopsy	NA	NA	NA	NA	NA	NA	NA	NA
556	2005	2001-2005	47	41-50	>45 (Old patient)	Male	Tongue	Yes	Well	NA	NA	Biopsy	NA	NA	NA	NA	NA	NA	NA	NA
557	2005	2001-2005	34	31-40	<=45 (Young patient)	Female	Tongue	No	NA	NA	NA	Biopsy	NA	NA	NA	NA	NA	NA	NA	NA
558	2005	2001-2005	62	61-70	>45 (Old patient)	Male	Mouth Non-specific	No	NA	NA	NA	Biopsy	NA	NA	NA	NA	NA	NA	NA	NA
559	2005	2001-2005	35	31-40	<=45 (Young patient)	Male	Tongue	Yes	Well	NA	NA	Biopsy	NA	NA	NA	NA	NA	NA	NA	NA
560	2005	2001-2005	32	31-40	<=45 (Young patient)	Male	Tongue	Yes	Well	NA	NA	Biopsy	NA	NA	NA	NA	NA	NA	NA	NA
561	2005	2001-2005	65	61-70	>45 (Old patient)	Male	Tongue	No	NA	NA	NA	Biopsy	NA	NA	NA	NA	NA	NA	NA	NA
562	2005	2001-2005	53	51-60	>45 (Old patient)	Male	Tongue	Yes	NA	NA	NA	Biopsy	NA	NA	NA	NA	NA	NA	NA	NA
563	2005	2001-2005	29	21-30	<=45 (Young patient)	Female	Tongue	No	NA	NA	NA	Biopsy	NA	NA	NA	NA	NA	NA	NA	NA
564	2005	2001-2005	23	21-30	<=45 (Young patient)	Male	Mouth Non-specific	Non-specific	Poor	NA	NA	Biopsy	NA	NA	NA	NA	NA	NA	NA	NA
565	2005	2001-2005	39	31-40	<=45 (Young patient)	Female	Mouth Non-specific	Yes	NA	NA	NA	Biopsy	NA	NA	NA	NA	NA	NA	NA	NA
566	2005	2001-2005	99	>80	>45 (Old patient)	Female	Tongue	Yes	NA	NA	NA	Biopsy	NA	NA	NA	NA	NA	NA	NA	NA
567	2005	2001-2005	59	51-60	>45 (Old patient)	Female	Lip	No	NA	NA	NA	Biopsy	NA	NA	NA	NA	NA	NA	NA	NA
568	2005	2001-2005	57	51-60	>45 (Old patient)	Male	Tongue	Yes	NA	NA	NA	Biopsy	NA	NA	NA	NA	NA	NA	NA	NA
569	2005	2001-2005	43	41-50	<=45 (Young patient)	Male	Mouth Non-specific	No	NA	NA	NA	Biopsy	NA	NA	NA	NA	NA	NA	NA	NA
570	2005	2001-2005	43	41-50	<=45 (Young patient)	Male	Tongue	Yes	Moderate	NA	NA	Biopsy	NA	NA	NA	NA	NA	NA	NA	NA
571	2005	2001-2005	46	41-50	>45 (Old patient)	Male	Tongue	Yes	NA	NA	NA	Biopsy	NA	NA	NA	NA	NA	NA	NA	NA
572	2005	2001-2005	65	61-70	>45 (Old patient)	Female	Lip	Non-specific	Moderate	NA	NA	Biopsy	NA	NA	NA	NA	NA	NA	NA	NA
573	2005	2001-2005	23	21-30	<=45 (Young patient)	Male	Tongue	Yes	Well	NA	NA	Biopsy	NA	NA	NA	NA	NA	NA	NA	NA
574	2005	2001-2005	48	41-50	>45 (Old patient)	Female	Tongue	No	NA	NA	NA	Biopsy	NA	NA	NA	NA	NA	NA	NA	NA
575	2005	2001-2005	39	31-40	<=45 (Young patient)	Male	Tongue	Yes	NA	NA	NA	Biopsy	NA	NA	NA	NA	NA	NA	NA	NA
576	2005	2001-2005	70	61-70	>45 (Old patient)	Male	Tongue	Yes	NA	NA	NA	Biopsy	NA	NA	NA	NA	NA	NA	NA	NA
577	2005	2001-2005	56	51-60	>45 (Old patient)	Female	Tongue	No	NA	NA	NA	Biopsy	NA	NA	NA	NA	NA	NA	NA	NA
578	2005	2001-2005	47	41-50	>45 (Old patient)	Female	Mouth Non-specific	Yes	Moderate	NA	NA	Biopsy	NA	NA	NA	NA	NA	NA	NA	NA
579	2005	2001-2005	48	41-50	>45 (Old patient)	Male	Tongue	Yes	Moderate	NA	NA	Biopsy	NA	NA	NA	NA	NA	NA	NA	NA
580	2004	2001-2005	48	41-50	>45 (Old patient)	Female	Mouth Non-specific	Yes	NA	NA	NA	Biopsy	NA	NA	NA	NA	NA	NA	NA	NA
581	2004	2001-2005	27	21-30	<=45 (Young patient)	Male	Tongue	Yes	NA	NA	NA	Biopsy	NA	NA	NA	NA	NA	NA	NA	NA
582	2004	2001-2005	56	51-60	>45 (Old patient)	Female	Mouth Non-specific	No	NA	NA	NA	Biopsy	NA	NA	NA	NA	NA	NA	NA	NA
583	2004	2001-2005	35	31-40	<=45 (Young patient)	Male	Tongue	Yes	Moderate	NA	NA	Biopsy	NA	NA	NA	NA	NA	NA	NA	NA
584	2004	2001-2005	45	41-50	<=45 (Young patient)	Male	Tongue	Yes	Well	NA	NA	Biopsy	NA	NA	NA	NA	NA	NA	NA	NA
585	2004	2001-2005	65	61-70	>45 (Old patient)	Male	Mouth Non-specific	Yes	NA	NA	NA	Biopsy	NA	NA	NA	NA	NA	NA	NA	NA
586	2004	2001-2005	73	71-80	>45 (Old patient)	Female	Lip	No	NA	NA	NA	Biopsy	NA	NA	NA	NA	NA	NA	NA	NA
587	2004	2001-2005	58	51-60	>45 (Old patient)	Male	Tongue	Yes	NA	NA	NA	Biopsy	NA	NA	NA	NA	NA	NA	NA	NA
588	2004	2001-2005	44	41-50	<=45 (Young patient)	Male	Mouth Non-specific	Yes	NA	NA	NA	Biopsy	NA	NA	NA	NA	NA	NA	NA	NA
589	2004	2001-2005	50	41-50	>45 (Old patient)	Male	Mouth Non-specific	Yes	NA	NA	NA	Biopsy	NA	NA	NA	NA	NA	NA	NA	NA
590	2004	2001-2005	24	21-30	<=45 (Young patient)	Female	Tongue	No	NA	NA	NA	Biopsy	NA	NA	NA	NA	NA	NA	NA	NA
591	2004	2001-2005	69	61-70	>45 (Old patient)	Male	Tongue	Yes	Poor	NA	NA	Biopsy	NA	NA	NA	NA	NA	NA	NA	NA
592	2004	2001-2005	70	61-70	>45 (Old patient)	Female	Mouth Non-specific	Yes	NA	NA	NA	Biopsy	NA	NA	NA	NA	NA	NA	NA	NA
593	2004	2001-2005	44	41-50	<=45 (Young patient)	Male	Gingiva	Yes	NA	NA	NA	Biopsy	NA	NA	NA	NA	NA	NA	NA	NA
594	2004	2001-2005	48	41-50	>45 (Old patient)	Male	Tongue	Yes	NA	NA	NA	Biopsy	NA	NA	NA	NA	NA	NA	NA	NA
595	2004	2001-2005	30	21-30	<=45 (Young patient)	Male	Tongue	Yes	NA	NA	NA	Biopsy	NA	NA	NA	NA	NA	NA	NA	NA
596	2004	2001-2005	22	21-30	<=45 (Young patient)	Male	Tongue	Yes	NA	NA	NA	Biopsy	NA	NA	NA	NA	NA	NA	NA	NA
597	2004	2001-2005	39	31-40	<=45 (Young patient)	Male	Tongue	Yes	NA	NA	NA	Biopsy	NA	NA	NA	NA	NA	NA	NA	NA
598	2004	2001-2005	72	71-80	>45 (Old patient)	Male	Tongue	Non-specific	NA	NA	NA	Biopsy	NA	NA	NA	NA	NA	NA	NA	NA
599	2004	2001-2005	42	41-50	<=45 (Young patient)	Male	Tongue	Non-specific	NA	NA	NA	Biopsy	NA	NA	NA	NA	NA	NA	NA	NA
600	2004	2001-2005	37	31-40	<=45 (Young patient)	Female	Lip	No	NA	NA	NA	Biopsy	NA	NA	NA	NA	NA	NA	NA	NA
601	2004	2001-2005	47	41-50	>45 (Old patient)	Male	Tongue	Yes	NA	NA	NA	Biopsy	NA	NA	NA	NA	NA	NA	NA	NA
602	2004	2001-2005	68	61-70	>45 (Old patient)	Female	Lip	No	NA	NA	NA	Biopsy	NA	NA	NA	NA	NA	NA	NA	NA
603	2004	2001-2005	60	51-60	>45 (Old patient)	Male	Gingiva	Yes	NA	NA	NA	Biopsy	NA	NA	NA	NA	NA	NA	NA	NA
604	2004	2001-2005	74	71-80	>45 (Old patient)	Female	Lip	Yes	NA	NA	NA	Biopsy	NA	NA	NA	NA	NA	NA	NA	NA
605	2004	2001-2005	26	21-30	<=45 (Young patient)	Male	Tongue	Yes	NA	NA	NA	Biopsy	NA	NA	NA	NA	NA	NA	NA	NA
606	2004	2001-2005	63	61-70	>45 (Old patient)	Female	Mouth Non-specific	Non-specific	Well	NA	NA	Biopsy	NA	NA	NA	NA	NA	NA	NA	NA
607	2004	2001-2005	65	61-70	>45 (Old patient)	Female	Tongue	Yes	NA	NA	NA	Biopsy	NA	NA	NA	NA	NA	NA	NA	NA
608	2004	2001-2005	51	51-60	>45 (Old patient)	Male	Lip	Yes	NA	NA	NA	Biopsy	NA	NA	NA	NA	NA	NA	NA	NA
609	2004	2001-2005	55	51-60	>45 (Old patient)	Female	Palate	Yes	NA	NA	NA	Biopsy	NA	NA	NA	NA	NA	NA	NA	NA
610	2004	2001-2005	59	51-60	>45 (Old patient)	Male	Mouth Non-specific	Non-specific	NA	NA	NA	Biopsy	NA	NA	NA	NA	NA	NA	NA	NA
611	2004	2001-2005	41	41-50	<=45 (Young patient)	Male	Mouth Non-specific	Yes	NA	NA	NA	Biopsy	NA	NA	NA	NA	NA	NA	NA	NA
612	2004	2001-2005	24	21-30	<=45 (Young patient)	Female	Tongue	No	NA	NA	NA	Biopsy	NA	NA	NA	NA	NA	NA	NA	NA
613	2004	2001-2005	27	21-30	<=45 (Young patient)	Male	Lip	Yes	Well	NA	NA	Biopsy	NA	NA	NA	NA	NA	NA	NA	NA
614	2004	2001-2005	70	61-70	>45 (Old patient)	Female	Gingiva	Yes	NA	NA	NA	Biopsy	NA	NA	NA	NA	NA	NA	NA	NA
615	2004	2001-2005	50	41-50	>45 (Old patient)	Male	Mouth Non-specific	No	NA	NA	NA	Biopsy	NA	NA	NA	NA	NA	NA	NA	NA
616	2004	2001-2005	36	31-40	<=45 (Young patient)	Male	Palate	No	NA	NA	NA	Biopsy	NA	NA	NA	NA	NA	NA	NA	NA
617	2004	2001-2005	62	61-70	>45 (Old patient)	Female	Tongue	Yes	NA	NA	NA	Biopsy	NA	NA	NA	NA	NA	NA	NA	NA
618	2004	2001-2005	51	51-60	>45 (Old patient)	Male	Mouth Non-specific	Yes	NA	NA	NA	Biopsy	NA	NA	NA	NA	NA	NA	NA	NA
619	2004	2001-2005	53	51-60	>45 (Old patient)	Female	Tongue	No	NA	NA	NA	Biopsy	NA	NA	NA	NA	NA	NA	NA	NA
620	2004	2001-2005	42	41-50	<=45 (Young patient)	Male	Tongue	No	Poor	NA	NA	Biopsy	NA	NA	NA	NA	NA	NA	NA	NA
621	2004	2001-2005	70	61-70	>45 (Old patient)	Female	Tongue	Yes	NA	NA	NA	Biopsy	NA	NA	NA	NA	NA	NA	NA	NA
622	2004	2001-2005	63	61-70	>45 (Old patient)	Male	Mouth Non-specific	Yes	NA	NA	NA	Biopsy	NA	NA	NA	NA	NA	NA	NA	NA
623	2003	2001-2005	48	41-50	>45 (Old patient)	Male	Tongue	Yes	NA	NA	NA	Biopsy	NA	NA	NA	NA	NA	NA	NA	NA
624	2003	2001-2005	29	21-30	<=45 (Young patient)	Male	Tongue	Yes	NA	NA	NA	Biopsy	NA	NA	NA	NA	NA	NA	NA	NA
625	2003	2001-2005	60	51-60	>45 (Old patient)	Male	Tongue	Yes	NA	NA	NA	Biopsy	NA	NA	NA	NA	NA	NA	NA	NA
626	2003	2001-2005	47	41-50	>45 (Old patient)	Female	Tongue	Yes	Moderate	13	13-16 (Grade III, Poor)	Biopsy	NA	NA	NA	NA	NA	NA	NA	NA
627	2003	2001-2005	53	51-60	>45 (Old patient)	Male	Tongue	Yes	NA	NA	NA	Biopsy	NA	NA	NA	NA	NA	NA	NA	NA
628	2003	2001-2005	48	41-50	>45 (Old patient)	Male	Tongue	Yes	NA	NA	NA	Biopsy	NA	NA	NA	NA	NA	NA	NA	NA
629	2003	2001-2005	46	41-50	>45 (Old patient)	Male	Tongue	Yes	NA	NA	NA	Biopsy	NA	NA	NA	NA	NA	NA	NA	NA
630	2003	2001-2005	37	31-40	<=45 (Young patient)	Male	Palate	Non-specific	NA	NA	NA	Biopsy	NA	NA	NA	NA	NA	NA	NA	NA
631	2003	2001-2005	40	31-40	<=45 (Young patient)	Female	Mouth Non-specific	Yes	NA	NA	NA	Biopsy	NA	NA	NA	NA	NA	NA	NA	NA
632	2003	2001-2005	62	61-70	>45 (Old patient)	Male	Tongue	Yes	NA	NA	NA	Biopsy	NA	NA	NA	NA	NA	NA	NA	NA
633	2003	2001-2005	53	51-60	>45 (Old patient)	Male	Mouth Non-specific	Yes	NA	NA	NA	Biopsy	NA	NA	NA	NA	NA	NA	NA	NA
634	2003	2001-2005	70	61-70	>45 (Old patient)	Male	Mouth Non-specific	Yes	NA	NA	NA	Biopsy	NA	NA	NA	NA	NA	NA	NA	NA
635	2003	2001-2005	38	31-40	<=45 (Young patient)	Female	Tongue	Non-specific	Poor	NA	NA	Biopsy	NA	NA	NA	NA	NA	NA	NA	NA
636	2003	2001-2005	51	51-60	>45 (Old patient)	Male	Mouth Non-specific	Yes	NA	NA	NA	Biopsy	NA	NA	NA	NA	NA	NA	NA	NA
637	2003	2001-2005	62	61-70	>45 (Old patient)	Male	Mouth Non-specific	Non-specific	Poor	NA	NA	Biopsy	NA	NA	NA	NA	NA	NA	NA	NA
638	2003	2001-2005	57	51-60	>45 (Old patient)	Male	Tongue	Yes	NA	NA	NA	Biopsy	NA	NA	NA	NA	NA	NA	NA	NA
639	2003	2001-2005	71	71-80	>45 (Old patient)	Female	Tongue	Non-specific	NA	NA	NA	Biopsy	NA	NA	NA	NA	NA	NA	NA	NA
640	2003	2001-2005	70	61-70	>45 (Old patient)	Female	Mouth Non-specific	Yes	NA	NA	NA	Biopsy	NA	NA	NA	NA	NA	NA	NA	NA
641	2003	2001-2005	65	61-70	>45 (Old patient)	Female	Tongue	Yes	NA	NA	NA	Biopsy	NA	NA	NA	NA	NA	NA	NA	NA
642	2003	2001-2005	35	31-40	<=45 (Young patient)	Male	Gingiva	No	NA	NA	NA	Biopsy	NA	NA	NA	NA	NA	NA	NA	NA
643	2003	2001-2005	55	51-60	>45 (Old patient)	Female	Tongue	Yes	Well	NA	NA	Biopsy	NA	NA	NA	NA	NA	NA	NA	NA
644	2003	2001-2005	65	61-70	>45 (Old patient)	Female	Lip	Yes	NA	NA	NA	Biopsy	NA	NA	NA	NA	NA	NA	NA	NA
645	2003	2001-2005	41	41-50	<=45 (Young patient)	Male	Mouth Non-specific	Non-specific	NA	NA	NA	Biopsy	NA	NA	NA	NA	NA	NA	NA	NA
646	2003	2001-2005	65	61-70	>45 (Old patient)	Female	Mouth Non-specific	Yes	NA	NA	NA	Biopsy	NA	NA	NA	NA	NA	NA	NA	NA
647	2003	2001-2005	59	51-60	>45 (Old patient)	Female	Mouth Non-specific	No	NA	NA	NA	Biopsy	NA	NA	NA	NA	NA	NA	NA	NA
648	2003	2001-2005	51	51-60	>45 (Old patient)	Female	Tongue	Yes	NA	NA	NA	Biopsy	NA	NA	NA	NA	NA	NA	NA	NA
649	2003	2001-2005	65	61-70	>45 (Old patient)	Female	Lip	Yes	NA	NA	NA	Biopsy	NA	NA	NA	NA	NA	NA	NA	NA
650	2003	2001-2005	28	21-30	<=45 (Young patient)	Male	Mouth Non-specific	Yes	NA	NA	NA	Biopsy	NA	NA	NA	NA	NA	NA	NA	NA
651	2003	2001-2005	40	31-40	<=45 (Young patient)	Male	FOM	Yes	Moderate	13	13-16 (Grade III, Poor)	Biopsy	NA	NA	NA	NA	NA	NA	NA	NA
652	2003	2001-2005	87	>80	>45 (Old patient)	Female	Palate	Yes	Well	NA	NA	Biopsy	NA	NA	NA	NA	NA	NA	NA	NA
653	2003	2001-2005	42	41-50	<=45 (Young patient)	Male	Tongue	Yes	NA	NA	NA	Biopsy	NA	NA	NA	NA	NA	NA	NA	NA
654	2003	2001-2005	39	31-40	<=45 (Young patient)	Male	Mouth Non-specific	Non-specific	NA	NA	NA	Biopsy	NA	NA	NA	NA	NA	NA	NA	NA
655	2003	2001-2005	79	71-80	>45 (Old patient)	Male	Tongue	Non-specific	NA	NA	NA	Biopsy	NA	NA	NA	NA	NA	NA	NA	NA
656	2003	2001-2005	23	21-30	<=45 (Young patient)	Male	Tongue	Yes	NA	NA	NA	Biopsy	NA	NA	NA	NA	NA	NA	NA	NA
657	2003	2001-2005	60	51-60	>45 (Old patient)	Male	Mouth Non-specific	Yes	NA	NA	NA	Biopsy	NA	NA	NA	NA	NA	NA	NA	NA
658	2003	2001-2005	51	51-60	>45 (Old patient)	Female	FOM	Yes	NA	NA	NA	Biopsy	NA	NA	NA	NA	NA	NA	NA	NA
659	2003	2001-2005	40	31-40	<=45 (Young patient)	Female	Tongue	Yes	NA	NA	NA	Biopsy	NA	NA	NA	NA	NA	NA	NA	NA
660	2003	2001-2005	37	31-40	<=45 (Young patient)	Female	Tongue	Yes	NA	NA	NA	Biopsy	NA	NA	NA	NA	NA	NA	NA	NA
661	2003	2001-2005	50	41-50	>45 (Old patient)	Female	FOM	Non-specific	NA	NA	NA	Biopsy	NA	NA	NA	NA	NA	NA	NA	NA
662	2003	2001-2005	57	51-60	>45 (Old patient)	Female	Tongue	Non-specific	Poor	NA	NA	Biopsy	NA	NA	NA	NA	NA	NA	NA	NA
663	2003	2001-2005	17	11-20	<=45 (Young patient)	Male	Tongue	Yes	Well	NA	NA	Biopsy	NA	NA	NA	NA	NA	NA	NA	NA
664	2003	2001-2005	73	71-80	>45 (Old patient)	Female	Mouth Non-specific	Yes	NA	NA	NA	Biopsy	NA	NA	NA	NA	NA	NA	NA	NA
665	2003	2001-2005	53	51-60	>45 (Old patient)	Male	Palate	Non-specific	Poor	NA	NA	Biopsy	NA	NA	NA	NA	NA	NA	NA	NA
666	2003	2001-2005	57	51-60	>45 (Old patient)	Female	Tongue	No	Poor	NA	NA	Biopsy	NA	NA	NA	NA	NA	NA	NA	NA
667	2003	2001-2005	55	51-60	>45 (Old patient)	Female	Mouth Non-specific	Yes	NA	NA	NA	Biopsy	NA	NA	NA	NA	NA	NA	NA	NA
668	2003	2001-2005	39	31-40	<=45 (Young patient)	Female	Tongue	Yes	NA	NA	NA	Biopsy	NA	NA	NA	NA	NA	NA	NA	NA
669	2003	2001-2005	60	51-60	>45 (Old patient)	Female	Tongue	No	NA	NA	NA	Biopsy	NA	NA	NA	NA	NA	NA	NA	NA
670	2003	2001-2005	77	71-80	>45 (Old patient)	Male	Gingiva	Yes	NA	NA	NA	Biopsy	NA	NA	NA	NA	NA	NA	NA	NA
671	2003	2001-2005	20	11-20	<=45 (Young patient)	Female	Mouth Non-specific	Yes	NA	NA	NA	Biopsy	NA	NA	NA	NA	NA	NA	NA	NA
672	2003	2001-2005	60	51-60	>45 (Old patient)	Female	Tongue	Yes	NA	NA	NA	Biopsy	NA	NA	NA	NA	NA	NA	NA	NA
673	2002	2001-2005	34	31-40	<=45 (Young patient)	Female	Mouth Non-specific	Non-specific	NA	NA	NA	Biopsy	NA	NA	NA	NA	NA	NA	NA	NA
674	2002	2001-2005	55	51-60	>45 (Old patient)	Female	Mouth Non-specific	Yes	Well	NA	NA	Biopsy	NA	NA	NA	NA	NA	NA	NA	NA
675	2002	2001-2005	60	51-60	>45 (Old patient)	Female	Palate	Yes	NA	NA	NA	Biopsy	NA	NA	NA	NA	NA	NA	NA	NA
676	2002	2001-2005	20	11-20	<=45 (Young patient)	Male	Tongue	Yes	NA	NA	NA	Biopsy	NA	NA	NA	NA	NA	NA	NA	NA
677	2002	2001-2005	48	41-50	>45 (Old patient)	Male	Tongue	Yes	NA	NA	NA	Biopsy	NA	NA	NA	NA	NA	NA	NA	NA
678	2002	2001-2005	54	51-60	>45 (Old patient)	Female	Mouth Non-specific	No	Poor	NA	NA	Biopsy	NA	NA	NA	NA	NA	NA	NA	NA
679	2002	2001-2005	48	41-50	>45 (Old patient)	Male	Mouth Non-specific	No	NA	NA	NA	Biopsy	NA	NA	NA	NA	NA	NA	NA	NA
680	2002	2001-2005	56	51-60	>45 (Old patient)	Male	Tongue	Yes	NA	NA	NA	Biopsy	NA	NA	NA	NA	NA	NA	NA	NA
681	2002	2001-2005	64	61-70	>45 (Old patient)	Male	Mouth Non-specific	Yes	Well	NA	NA	Biopsy	NA	NA	NA	NA	NA	NA	NA	NA
682	2002	2001-2005	67	61-70	>45 (Old patient)	Male	Mouth Non-specific	Non-specific	Poor	NA	NA	Biopsy	NA	NA	NA	NA	NA	NA	NA	NA
683	2002	2001-2005	55	51-60	>45 (Old patient)	Female	Gingiva	Yes	Well	NA	NA	Biopsy	NA	NA	NA	NA	NA	NA	NA	NA
684	2002	2001-2005	62	61-70	>45 (Old patient)	Male	FOM	Yes	NA	NA	NA	Biopsy	NA	NA	NA	NA	NA	NA	NA	NA
685	2002	2001-2005	44	41-50	<=45 (Young patient)	Male	Tongue	Yes	NA	NA	NA	Biopsy	NA	NA	NA	NA	NA	NA	NA	NA
686	2002	2001-2005	47	41-50	>45 (Old patient)	Male	Palate	Yes	NA	NA	NA	Biopsy	NA	NA	NA	NA	NA	NA	NA	NA
687	2002	2001-2005	47	41-50	>45 (Old patient)	Male	Tongue	Yes	NA	NA	NA	Biopsy	NA	NA	NA	NA	NA	NA	NA	NA
688	2002	2001-2005	22	21-30	<=45 (Young patient)	Female	Tongue	Yes	Well	NA	NA	Biopsy	NA	NA	NA	NA	NA	NA	NA	NA
689	2002	2001-2005	50	41-50	>45 (Old patient)	Male	Mouth Non-specific	No	NA	NA	NA	Biopsy	NA	NA	NA	NA	NA	NA	NA	NA
690	2002	2001-2005	72	71-80	>45 (Old patient)	Male	Mouth Non-specific	Yes	NA	NA	NA	Biopsy	NA	NA	NA	NA	NA	NA	NA	NA
691	2002	2001-2005	50	41-50	>45 (Old patient)	Female	Tongue	Yes	NA	NA	NA	Biopsy	NA	NA	NA	NA	NA	NA	NA	NA
692	2002	2001-2005	47	41-50	>45 (Old patient)	Female	Tongue	Yes	NA	NA	NA	Biopsy	NA	NA	NA	NA	NA	NA	NA	NA
693	2002	2001-2005	60	51-60	>45 (Old patient)	Female	Tongue	Yes	NA	NA	NA	Biopsy	NA	NA	NA	NA	NA	NA	NA	NA
694	2002	2001-2005	30	21-30	<=45 (Young patient)	Male	Tongue	Yes	NA	NA	NA	Biopsy	NA	NA	NA	NA	NA	NA	NA	NA
695	2002	2001-2005	70	61-70	>45 (Old patient)	Female	Mouth Non-specific	Yes	NA	NA	NA	Biopsy	NA	NA	NA	NA	NA	NA	NA	NA
696	2002	2001-2005	56	51-60	>45 (Old patient)	Male	Mouth Non-specific	Yes	NA	NA	NA	Biopsy	NA	NA	NA	NA	NA	NA	NA	NA
697	2002	2001-2005	60	51-60	>45 (Old patient)	Male	Tongue	Yes	Well	NA	NA	Biopsy	NA	NA	NA	NA	NA	NA	NA	NA
698	2002	2001-2005	65	61-70	>45 (Old patient)	Female	Mouth Non-specific	Yes	NA	NA	NA	Biopsy	NA	NA	NA	NA	NA	NA	NA	NA
699	2002	2001-2005	57	51-60	>45 (Old patient)	Male	Mouth Non-specific	Yes	NA	NA	NA	Biopsy	NA	NA	NA	NA	NA	NA	NA	NA
700	2002	2001-2005	60	51-60	>45 (Old patient)	Female	Tongue	Yes	NA	NA	NA	Biopsy	NA	NA	NA	NA	NA	NA	NA	NA
701	2002	2001-2005	38	31-40	<=45 (Young patient)	Female	Tongue	Yes	NA	NA	NA	Biopsy	NA	NA	NA	NA	NA	NA	NA	NA
702	2002	2001-2005	62	61-70	>45 (Old patient)	Female	Tongue	Yes	Poor	NA	NA	Biopsy	NA	NA	NA	NA	NA	NA	NA	NA
703	2002	2001-2005	76	71-80	>45 (Old patient)	Female	Lip	Yes	Well	NA	NA	Biopsy	NA	NA	NA	NA	NA	NA	NA	NA
704	2002	2001-2005	76	71-80	>45 (Old patient)	Female	Lip	Yes	Well	NA	NA	Biopsy	NA	NA	NA	NA	NA	NA	NA	NA
705	2002	2001-2005	27	21-30	<=45 (Young patient)	Female	Tongue	Non-specific	NA	NA	NA	Biopsy	NA	NA	NA	NA	NA	NA	NA	NA
706	2002	2001-2005	32	31-40	<=45 (Young patient)	Male	Tongue	No	Poor	NA	NA	Biopsy	NA	NA	NA	NA	NA	NA	NA	NA
707	2002	2001-2005	52	51-60	>45 (Old patient)	Male	Palate	No	NA	NA	NA	Biopsy	NA	NA	NA	NA	NA	NA	NA	NA
708	2002	2001-2005	75	71-80	>45 (Old patient)	Male	Mouth Non-specific	Yes	Well	NA	NA	Biopsy	NA	NA	NA	NA	NA	NA	NA	NA
709	2002	2001-2005	67	61-70	>45 (Old patient)	Male	Tongue	Yes	NA	NA	NA	Biopsy	NA	NA	NA	NA	NA	NA	NA	NA
710	2002	2001-2005	60	51-60	>45 (Old patient)	Female	Mouth Non-specific	Yes	Moderate	NA	NA	Biopsy	NA	NA	NA	NA	NA	NA	NA	NA
711	2020	2016-2020	42	41-50	<=45 (Young patient)	Male	Tongue	Yes	Moderate	9	9-12 (Grade II, Moderate)	Biopsy	NA	NA	NA	NA	NA	NA	NA	NA
712	2002	2001-2005	63	61-70	>45 (Old patient)	Female	Tongue	Yes	NA	NA	NA	Biopsy	NA	NA	NA	NA	NA	NA	NA	NA
713	2020	2016-2020	54	51-60	>45 (Old patient)	Male	Mouth Non-specific	Yes	Well	8	4-8 (Grade I, Good)	Biopsy	NA	NA	NA	NA	NA	NA	NA	NA
714	2002	2001-2005	68	61-70	>45 (Old patient)	Male	Tongue	Non-specific	Moderate	NA	NA	Biopsy	NA	NA	NA	NA	NA	NA	NA	NA
715	2002	2001-2005	55	51-60	>45 (Old patient)	Female	Mouth Non-specific	Yes	NA	NA	NA	Biopsy	NA	NA	NA	NA	NA	NA	NA	NA
716	2020	2016-2020	48	41-50	>45 (Old patient)	Male	Tongue	Yes	Well	8	4-8 (Grade I, Good)	Biopsy	NA	NA	NA	NA	NA	NA	NA	NA
717	2020	2016-2020	64	61-70	>45 (Old patient)	Male	Gingiva	Yes	Well	8	4-8 (Grade I, Good)	Biopsy	NA	NA	NA	NA	NA	NA	Negative	NA
718	2020	2016-2020	51	51-60	>45 (Old patient)	Female	Tongue	Yes	Well	8	4-8 (Grade I, Good)	Biopsy	NA	NA	NA	NA	NA	NA	NA	NA
719	2020	2016-2020	56	51-60	>45 (Old patient)	Female	Tongue	Yes	Well	8	4-8 (Grade I, Good)	Biopsy	NA	NA	NA	NA	NA	NA	NA	NA
720	2020	2016-2020	65	61-70	>45 (Old patient)	Female	Mouth Non-specific	Yes	Well	8	4-8 (Grade I, Good)	Biopsy	NA	NA	NA	NA	NA	NA	Negative	NA
721	2020	2016-2020	48	41-50	>45 (Old patient)	Male	Mouth Non-specific	No	Poor	13	13-16 (Grade III, Poor)	Biopsy	NA	NA	NA	NA	NA	NA	Negative	NA
722	2020	2016-2020	51	51-60	>45 (Old patient)	Female	Tongue	Yes	Well	9	9-12 (Grade II, Moderate)	Biopsy	NA	NA	NA	NA	NA	NA	NA	NA
723	2002	2001-2005	29	21-30	<=45 (Young patient)	Female	Tongue	Yes	NA	NA	NA	Biopsy	NA	NA	NA	NA	NA	NA	NA	NA
724	2020	2016-2020	41	41-50	<=45 (Young patient)	Male	Tongue	Yes	Moderate	8	4-8 (Grade I, Good)	Biopsy	NA	NA	NA	NA	NA	NA	Positive	NA
725	2020	2016-2020	62	61-70	>45 (Old patient)	Female	Gingiva	Yes	Well	8	4-8 (Grade I, Good)	Biopsy	NA	NA	NA	NA	NA	NA	Negative	NA
726	2020	2016-2020	25	21-30	<=45 (Young patient)	Male	Tongue	Yes	NA	9	9-12 (Grade II, Moderate)	Biopsy	NA	NA	NA	NA	NA	NA	Negative	NA
727	2020	2016-2020	55	51-60	>45 (Old patient)	Female	Tongue	Yes	Well	8	4-8 (Grade I, Good)	Biopsy	NA	NA	NA	NA	NA	NA	Negative	NA
728	2020	2016-2020	59	51-60	>45 (Old patient)	Female	Tongue	Yes	Well	7	4-8 (Grade I, Good)	Biopsy	NA	NA	NA	NA	NA	NA	NA	NA
729	2020	2016-2020	72	71-80	>45 (Old patient)	Female	Buccal Mucosa	Yes	Well	8	4-8 (Grade I, Good)	Biopsy	NA	NA	NA	NA	NA	NA	Negative	NA
730	2020	2016-2020	41	41-50	<=45 (Young patient)	Male	Tongue	Yes	Well	10	9-12 (Grade II, Moderate)	Biopsy	NA	NA	NA	NA	NA	NA	NA	NA
731	2020	2016-2020	42	41-50	<=45 (Young patient)	Male	Tongue	Yes	Moderate	11	9-12 (Grade II, Moderate)	Biopsy	NA	NA	NA	NA	NA	NA	Negative	NA
732	2020	2016-2020	42	41-50	<=45 (Young patient)	Female	Tongue	Yes	Well	7	4-8 (Grade I, Good)	Biopsy	NA	NA	NA	NA	NA	NA	Negative	NA
733	2020	2016-2020	47	41-50	>45 (Old patient)	Male	Tongue	Yes	Well	8	4-8 (Grade I, Good)	Biopsy	NA	NA	NA	NA	NA	NA	Negative	NA
734	2020	2016-2020	47	41-50	>45 (Old patient)	Male	Tongue	Yes	Well	7	4-8 (Grade I, Good)	Biopsy	NA	NA	NA	NA	NA	NA	NA	NA
735	2020	2016-2020	35	31-40	<=45 (Young patient)	Male	Gingiva	Yes	Well	NA	NA	Biopsy	NA	NA	NA	NA	NA	NA	Negative	NA
736	2020	2016-2020	36	31-40	<=45 (Young patient)	Female	Tongue	Yes	Moderate	11	9-12 (Grade II, Moderate)	Biopsy	NA	NA	NA	NA	NA	NA	Negative	NA
737	2020	2016-2020	56	51-60	>45 (Old patient)	Male	Tongue	No	NA	12	9-12 (Grade II, Moderate)	Biopsy	NA	NA	NA	NA	NA	NA	NA	NA
738	2020	2016-2020	49	41-50	>45 (Old patient)	Male	Tongue	Yes	Well	9	9-12 (Grade II, Moderate)	Biopsy	NA	NA	NA	NA	NA	NA	NA	NA
739	2020	2016-2020	38	31-40	<=45 (Young patient)	Female	Tongue	No	Moderate	12	9-12 (Grade II, Moderate)	Biopsy	NA	NA	NA	NA	NA	NA	NA	NA
740	2020	2016-2020	68	61-70	>45 (Old patient)	Male	Tongue	Yes	Moderate	10	9-12 (Grade II, Moderate)	Biopsy	NA	NA	NA	NA	NA	NA	NA	NA
741	2020	2016-2020	45	41-50	<=45 (Young patient)	Female	Tongue	Yes	NA	NA	NA	Biopsy	NA	NA	NA	NA	NA	NA	NA	NA
742	2020	2016-2020	57	51-60	>45 (Old patient)	Male	Tongue	Yes	Well	4	4-8 (Grade I, Good)	Biopsy	NA	NA	NA	NA	NA	NA	NA	NA
743	2020	2016-2020	24	21-30	<=45 (Young patient)	Female	Mouth Non-specific	Yes	Moderate	NA	NA	Biopsy	NA	NA	NA	NA	NA	NA	Negative	NA
744	2020	2016-2020	63	61-70	>45 (Old patient)	Male	Mouth Non-specific	Yes	Well	8	4-8 (Grade I, Good)	Biopsy	NA	NA	NA	NA	NA	NA	Negative	NA
745	2020	2016-2020	50	41-50	>45 (Old patient)	Male	Tongue	Yes	Well	7	4-8 (Grade I, Good)	Biopsy	NA	NA	NA	NA	NA	NA	NA	NA
746	2002	2001-2005	30	21-30	<=45 (Young patient)	Male	Tongue	No	Tidak Berdiferensiasi	NA	NA	Biopsy	NA	NA	NA	NA	NA	NA	NA	NA
747	2020	2016-2020	32	31-40	<=45 (Young patient)	Female	Tongue	Yes	Well	9	9-12 (Grade II, Moderate)	Biopsy	NA	NA	NA	NA	NA	NA	NA	NA
748	2020	2016-2020	49	41-50	>45 (Old patient)	Male	Tongue	Yes	Moderate	9	9-12 (Grade II, Moderate)	Biopsy	NA	NA	NA	NA	NA	NA	NA	NA
749	2020	2016-2020	36	31-40	<=45 (Young patient)	Male	Mouth Non-specific	Yes	Moderate	10	9-12 (Grade II, Moderate)	Biopsy	NA	NA	NA	NA	NA	NA	NA	NA
750	2020	2016-2020	62	61-70	>45 (Old patient)	Male	Mouth Non-specific	No	Moderate	NA	NA	Biopsy	NA	NA	NA	NA	NA	NA	NA	NA
751	2020	2016-2020	60	51-60	>45 (Old patient)	Male	Tongue	Yes	Well	6	4-8 (Grade I, Good)	Biopsy	NA	NA	NA	NA	NA	NA	NA	NA
752	2020	2016-2020	77	71-80	>45 (Old patient)	Female	Mouth Non-specific	Yes	Well	9	9-12 (Grade II, Moderate)	Biopsy	NA	NA	NA	NA	NA	NA	NA	NA
753	2020	2016-2020	42	41-50	<=45 (Young patient)	Male	Mouth Non-specific	Yes	Well	7	4-8 (Grade I, Good)	Biopsy	NA	NA	NA	NA	NA	NA	NA	NA
754	2020	2016-2020	58	51-60	>45 (Old patient)	Male	Tongue	Yes	Well	7	4-8 (Grade I, Good)	Biopsy	NA	NA	NA	NA	NA	NA	NA	NA
755	2020	2016-2020	46	41-50	>45 (Old patient)	Male	Tongue	Yes	Well	7	4-8 (Grade I, Good)	Biopsy	NA	NA	NA	NA	NA	NA	Negative	NA
756	2020	2016-2020	60	51-60	>45 (Old patient)	Female	Tongue	Yes	Well	7	4-8 (Grade I, Good)	Biopsy	NA	NA	NA	NA	NA	NA	NA	NA
757	2020	2016-2020	51	51-60	>45 (Old patient)	Male	Tongue	Yes	Moderate	4	4-8 (Grade I, Good)	Biopsy	NA	NA	NA	NA	NA	NA	NA	NA
758	2020	2016-2020	22	21-30	<=45 (Young patient)	Female	Tongue	Yes	Well	7	4-8 (Grade I, Good)	Biopsy	NA	NA	NA	NA	NA	NA	NA	NA
759	2002	2001-2005	56	51-60	>45 (Old patient)	Female	Palate	No	NA	NA	NA	Biopsy	NA	NA	NA	NA	NA	NA	NA	NA
760	2002	2001-2005	54	51-60	>45 (Old patient)	Male	Tongue	Yes	NA	NA	NA	Biopsy	NA	NA	NA	NA	NA	NA	NA	NA
761	2002	2001-2005	45	41-50	<=45 (Young patient)	Male	Tongue	Yes	NA	NA	NA	Biopsy	NA	NA	NA	NA	NA	NA	NA	NA
762	2019	2016-2020	51	51-60	>45 (Old patient)	Female	Tongue	Yes	Well	10	9-12 (Grade II, Moderate)	Biopsy	NA	NA	NA	NA	NA	NA	NA	NA
763	2019	2016-2020	32	31-40	<=45 (Young patient)	Female	Tongue	Yes	Well	8	4-8 (Grade I, Good)	Biopsy	NA	NA	NA	NA	NA	NA	NA	NA
764	2019	2016-2020	62	61-70	>45 (Old patient)	Male	Tongue	Yes	Well	7	4-8 (Grade I, Good)	Biopsy	NA	NA	NA	NA	NA	NA	NA	NA
765	2019	2016-2020	37	31-40	<=45 (Young patient)	Female	Tongue	Yes	NA	8	4-8 (Grade I, Good)	Biopsy	NA	NA	NA	NA	NA	NA	NA	NA
766	2019	2016-2020	40	31-40	<=45 (Young patient)	Female	Tongue	Yes	Well	9	9-12 (Grade II, Moderate)	Biopsy	NA	NA	NA	NA	NA	NA	NA	NA
767	2019	2016-2020	60	51-60	>45 (Old patient)	Male	Palate	Yes	Well	NA	NA	Biopsy	NA	NA	NA	NA	NA	NA	NA	NA
768	2019	2016-2020	34	31-40	<=45 (Young patient)	Female	Tongue	No	Moderate	11	9-12 (Grade II, Moderate)	Biopsy	NA	NA	NA	NA	NA	NA	Negative	NA
769	2019	2016-2020	59	51-60	>45 (Old patient)	Male	Gingiva	Yes	Well	8	4-8 (Grade I, Good)	Biopsy	NA	NA	NA	NA	NA	NA	Negative	NA
770	2019	2016-2020	41	41-50	<=45 (Young patient)	Female	Tongue	Yes	Well	9	9-12 (Grade II, Moderate)	Biopsy	NA	NA	NA	NA	NA	NA	Negative	NA
771	2019	2016-2020	36	31-40	<=45 (Young patient)	Male	Tongue	Yes	Well	7	4-8 (Grade I, Good)	Biopsy	NA	NA	NA	NA	NA	NA	NA	NA
772	2019	2016-2020	37	31-40	<=45 (Young patient)	Female	Tongue	Yes	Poor	11	9-12 (Grade II, Moderate)	Biopsy	NA	NA	NA	NA	NA	NA	NA	NA
773	2019	2016-2020	56	51-60	>45 (Old patient)	Male	Tongue	Yes	Well	9	9-12 (Grade II, Moderate)	Biopsy	NA	NA	NA	NA	NA	NA	Negative	NA
774	2019	2016-2020	37	31-40	<=45 (Young patient)	Female	Tongue	Yes	Well	7	4-8 (Grade I, Good)	Biopsy	NA	NA	NA	NA	NA	NA	Negative	NA
775	2019	2016-2020	36	31-40	<=45 (Young patient)	Female	Tongue	Yes	Well	NA	NA	Biopsy	NA	NA	NA	NA	NA	NA	Negative	NA
776	2019	2016-2020	64	61-70	>45 (Old patient)	Male	Tongue	Yes	Moderate	NA	NA	Biopsy	NA	NA	NA	NA	NA	NA	NA	NA
777	2019	2016-2020	53	51-60	>45 (Old patient)	Female	Mouth Non-specific	Yes	Moderate	NA	NA	Biopsy	NA	NA	NA	NA	NA	NA	NA	NA
778	2019	2016-2020	43	41-50	<=45 (Young patient)	Female	Tongue	Yes	NA	5	4-8 (Grade I, Good)	Biopsy	NA	NA	NA	NA	NA	NA	NA	NA
779	2019	2016-2020	56	51-60	>45 (Old patient)	Female	Buccal Mucosa	No	Moderate	NA	NA	Biopsy	NA	NA	NA	NA	NA	NA	NA	NA
780	2019	2016-2020	73	71-80	>45 (Old patient)	Female	Buccal Mucosa	Yes	Well	NA	NA	Biopsy	NA	NA	NA	NA	NA	NA	NA	NA
781	2019	2016-2020	68	61-70	>45 (Old patient)	Male	Tongue	Yes	Well	9	9-12 (Grade II, Moderate)	Biopsy	NA	NA	NA	NA	NA	NA	NA	NA
782	2019	2016-2020	30	21-30	<=45 (Young patient)	Female	Tongue	Yes	Moderate	11	9-12 (Grade II, Moderate)	Biopsy	NA	NA	NA	NA	NA	NA	NA	NA
783	2019	2016-2020	63	61-70	>45 (Old patient)	Male	Palate	No	Poor	NA	NA	Biopsy	NA	NA	NA	NA	NA	NA	NA	NA
784	2018	2016-2020	41	41-50	<=45 (Young patient)	Male	Tongue	Yes	Well	5	4-8 (Grade I, Good)	Biopsy	NA	NA	NA	NA	NA	NA	NA	NA
785	2018	2016-2020	33	31-40	<=45 (Young patient)	Female	Gingiva	Yes	Well	NA	NA	Biopsy	NA	NA	NA	NA	NA	NA	NA	NA
786	2018	2016-2020	59	51-60	>45 (Old patient)	Female	Palate	Yes	Well	9	9-12 (Grade II, Moderate)	Biopsy	NA	NA	NA	NA	NA	NA	Positive	NA
787	2018	2016-2020	57	51-60	>45 (Old patient)	Female	Buccal Mucosa	Yes	Well	7	4-8 (Grade I, Good)	Biopsy	NA	NA	NA	NA	NA	NA	NA	NA
788	2018	2016-2020	49	41-50	>45 (Old patient)	Female	Mouth Non-specific	Yes	Moderate	NA	NA	Biopsy	NA	NA	NA	NA	NA	NA	Negative	NA
789	2018	2016-2020	65	61-70	>45 (Old patient)	Male	Tongue	Yes	NA	8	4-8 (Grade I, Good)	Biopsy	NA	NA	NA	NA	NA	NA	NA	NA
790	2018	2016-2020	66	61-70	>45 (Old patient)	Male	Gingiva	Yes	NA	6	4-8 (Grade I, Good)	Biopsy	NA	NA	NA	NA	NA	NA	NA	NA
791	2018	2016-2020	54	51-60	>45 (Old patient)	Male	Tongue	No	Moderate	14	13-16 (Grade III, Poor)	Biopsy	NA	NA	NA	NA	NA	NA	Positive	NA
792	2018	2016-2020	30	21-30	<=45 (Young patient)	Male	Tongue	No	NA	9	9-12 (Grade II, Moderate)	Biopsy	NA	NA	NA	NA	NA	NA	NA	NA
793	2018	2016-2020	60	51-60	>45 (Old patient)	Female	Tongue	Yes	Moderate	9	9-12 (Grade II, Moderate)	Biopsy	NA	NA	NA	NA	NA	NA	NA	NA
794	2018	2016-2020	34	31-40	<=45 (Young patient)	Male	Tongue	Yes	NA	8	4-8 (Grade I, Good)	Biopsy	NA	NA	NA	NA	NA	NA	Positive	NA
795	2018	2016-2020	60	51-60	>45 (Old patient)	Male	Tongue	Yes	NA	8	4-8 (Grade I, Good)	Biopsy	NA	NA	NA	NA	NA	NA	Positive	NA
796	2018	2016-2020	27	21-30	<=45 (Young patient)	Male	Gingiva	No	Poor	NA	NA	Biopsy	NA	NA	NA	NA	NA	NA	NA	NA
797	2018	2016-2020	67	61-70	>45 (Old patient)	Male	Tongue	Yes	Well	9	9-12 (Grade II, Moderate)	Biopsy	NA	NA	NA	NA	NA	NA	NA	NA
798	2018	2016-2020	53	51-60	>45 (Old patient)	Male	Tongue	Yes	NA	7	4-8 (Grade I, Good)	Biopsy	NA	NA	NA	NA	NA	NA	NA	NA
799	2018	2016-2020	35	31-40	<=45 (Young patient)	Female	Tongue	No	Poor	9	9-12 (Grade II, Moderate)	Biopsy	NA	NA	NA	NA	NA	NA	NA	NA
800	2018	2016-2020	74	71-80	>45 (Old patient)	Female	Tongue	Yes	Well	8	4-8 (Grade I, Good)	Biopsy	NA	NA	NA	NA	NA	NA	NA	NA
801	2018	2016-2020	52	51-60	>45 (Old patient)	Female	Mouth Non-specific	Yes	Well	7	4-8 (Grade I, Good)	Biopsy	NA	NA	NA	NA	NA	NA	NA	NA
802	2018	2016-2020	45	41-50	<=45 (Young patient)	Male	Palate	Yes	Moderate	NA	NA	Biopsy	NA	NA	NA	NA	NA	NA	NA	NA
803	2018	2016-2020	59	51-60	>45 (Old patient)	Male	Mouth Non-specific	Yes	Well	7	4-8 (Grade I, Good)	Biopsy	NA	NA	NA	NA	NA	NA	Negative	NA
804	2018	2016-2020	30	21-30	<=45 (Young patient)	Female	Tongue	No	Poor	13	13-16 (Grade III, Poor)	Biopsy	NA	NA	NA	NA	NA	NA	NA	NA
805	2018	2016-2020	36	31-40	<=45 (Young patient)	Male	Tongue	No	Poor	11	9-12 (Grade II, Moderate)	Biopsy	NA	NA	NA	NA	NA	NA	NA	NA
806	2018	2016-2020	43	41-50	<=45 (Young patient)	Male	Tongue	Yes	Poor	9	9-12 (Grade II, Moderate)	Biopsy	NA	NA	NA	NA	NA	NA	NA	NA
807	2018	2016-2020	63	61-70	>45 (Old patient)	Male	Tongue	Yes	NA	10	9-12 (Grade II, Moderate)	Biopsy	NA	NA	NA	NA	NA	NA	NA	NA
808	2018	2016-2020	65	61-70	>45 (Old patient)	Male	Tongue	Yes	Well	6	4-8 (Grade I, Good)	Biopsy	NA	NA	NA	NA	NA	NA	NA	NA
809	2017	2016-2020	58	51-60	>45 (Old patient)	Male	Tongue	Yes	Well	7	4-8 (Grade I, Good)	Biopsy	NA	NA	NA	NA	NA	NA	NA	NA
810	2017	2016-2020	47	41-50	>45 (Old patient)	Female	Tongue	Yes	Well	6	4-8 (Grade I, Good)	Biopsy	NA	NA	NA	NA	NA	NA	NA	NA
811	2017	2016-2020	42	41-50	<=45 (Young patient)	Male	Tongue	Yes	Well	10	9-12 (Grade II, Moderate)	Biopsy	NA	NA	NA	NA	NA	NA	NA	NA
812	2017	2016-2020	55	51-60	>45 (Old patient)	Male	Tongue	Yes	Moderate	11	9-12 (Grade II, Moderate)	Biopsy	NA	NA	NA	NA	NA	NA	NA	NA
813	2017	2016-2020	48	41-50	>45 (Old patient)	Female	Mouth Non-specific	Yes	Well	NA	NA	Biopsy	NA	NA	NA	NA	NA	NA	NA	NA
814	2017	2016-2020	70	61-70	>45 (Old patient)	Male	Tongue	Yes	Well	6	4-8 (Grade I, Good)	Biopsy	NA	NA	NA	NA	NA	NA	Negative	NA
815	2017	2016-2020	67	61-70	>45 (Old patient)	Male	Palate	No	Well	NA	NA	Biopsy	NA	NA	NA	NA	NA	NA	NA	NA
816	2017	2016-2020	65	61-70	>45 (Old patient)	Female	Tongue	Yes	Moderate	10	9-12 (Grade II, Moderate)	Biopsy	NA	NA	NA	NA	NA	NA	NA	NA
817	2017	2016-2020	68	61-70	>45 (Old patient)	Female	Tongue	Yes	Moderate	NA	NA	Biopsy	NA	NA	NA	NA	NA	NA	Negative	NA
818	2017	2016-2020	31	31-40	<=45 (Young patient)	Male	Tongue	Yes	Well	7	4-8 (Grade I, Good)	Biopsy	NA	NA	NA	NA	NA	NA	NA	NA
819	2017	2016-2020	53	51-60	>45 (Old patient)	Male	Tongue	Non-specific	Moderate	NA	NA	Biopsy	NA	NA	NA	NA	NA	NA	NA	NA
820	2017	2016-2020	27	21-30	<=45 (Young patient)	Male	Tongue	Yes	NA	9	9-12 (Grade II, Moderate)	Biopsy	NA	NA	NA	NA	NA	NA	NA	NA
821	2017	2016-2020	42	41-50	<=45 (Young patient)	Male	Tongue	Yes	Well	13	13-16 (Grade III, Poor)	Biopsy	NA	NA	NA	NA	NA	NA	NA	NA
822	2017	2016-2020	52	51-60	>45 (Old patient)	Male	Palate	Yes	Well	NA	NA	Biopsy	NA	NA	NA	NA	NA	NA	NA	NA
823	2017	2016-2020	41	41-50	<=45 (Young patient)	Female	Tongue	Yes	NA	10	9-12 (Grade II, Moderate)	Biopsy	NA	NA	NA	NA	NA	NA	Negative	NA
824	2017	2016-2020	60	51-60	>45 (Old patient)	Male	Tongue	Yes	Well	11	9-12 (Grade II, Moderate)	Biopsy	NA	NA	NA	NA	NA	NA	NA	NA
825	2017	2016-2020	75	71-80	>45 (Old patient)	Female	Lip	Yes	Well	7	4-8 (Grade I, Good)	Biopsy	NA	NA	NA	NA	NA	NA	NA	NA
826	2017	2016-2020	31	31-40	<=45 (Young patient)	Male	Tongue	No	Moderate	10	9-12 (Grade II, Moderate)	Biopsy	NA	NA	NA	NA	NA	NA	NA	NA
827	2017	2016-2020	45	41-50	<=45 (Young patient)	Male	Tongue	Yes	Well	8	4-8 (Grade I, Good)	Biopsy	NA	NA	NA	NA	NA	NA	NA	NA
828	2017	2016-2020	41	41-50	<=45 (Young patient)	Male	Mouth Non-specific	Yes	Well	9	9-12 (Grade II, Moderate)	Biopsy	NA	NA	NA	NA	NA	NA	NA	NA
829	2017	2016-2020	65	61-70	>45 (Old patient)	Male	Tongue	Yes	Moderate	11	9-12 (Grade II, Moderate)	Biopsy	NA	NA	NA	NA	NA	NA	NA	NA
830	2017	2016-2020	67	61-70	>45 (Old patient)	Male	Palate	Yes	Well	9	9-12 (Grade II, Moderate)	Biopsy	NA	NA	NA	NA	NA	NA	Positive	NA
831	2017	2016-2020	44	41-50	<=45 (Young patient)	Female	Tongue	Yes	Moderate	10	9-12 (Grade II, Moderate)	Biopsy	NA	NA	NA	NA	NA	NA	NA	NA
832	2017	2016-2020	39	31-40	<=45 (Young patient)	Female	Mouth Non-specific	Yes	Moderate	9	9-12 (Grade II, Moderate)	Biopsy	NA	NA	NA	NA	NA	NA	NA	NA
833	2016	2016-2020	57	51-60	>45 (Old patient)	Female	Tongue	Yes	Moderate	11	9-12 (Grade II, Moderate)	Biopsy	NA	NA	NA	NA	NA	NA	NA	NA
834	2016	2016-2020	54	51-60	>45 (Old patient)	Male	Tongue	Yes	Well	8	4-8 (Grade I, Good)	Biopsy	NA	NA	NA	NA	NA	NA	Negative	NA
835	2016	2016-2020	40	31-40	<=45 (Young patient)	Female	Tongue	Yes	NA	11	9-12 (Grade II, Moderate)	Biopsy	NA	NA	NA	NA	NA	NA	Positive	NA
836	2016	2016-2020	81	>80	>45 (Old patient)	Male	Tongue	Yes	NA	7	4-8 (Grade I, Good)	Biopsy	NA	NA	NA	NA	NA	NA	Positive	NA
837	2016	2016-2020	63	61-70	>45 (Old patient)	Female	Tongue	Yes	Well	7	4-8 (Grade I, Good)	Biopsy	NA	NA	NA	NA	NA	NA	Negative	NA
838	2016	2016-2020	36	31-40	<=45 (Young patient)	Female	Mouth Non-specific	Non-specific	Poor	8	4-8 (Grade I, Good)	Biopsy	NA	NA	NA	NA	NA	NA	Negative	NA
839	2016	2016-2020	52	51-60	>45 (Old patient)	Female	Tongue	Yes	Moderate	11	9-12 (Grade II, Moderate)	Biopsy	NA	NA	NA	NA	NA	NA	NA	NA
840	2016	2016-2020	44	41-50	<=45 (Young patient)	Male	Buccal Mucosa	Yes	Well	8	4-8 (Grade I, Good)	Biopsy	NA	NA	NA	NA	NA	NA	Positive	NA
841	2016	2016-2020	45	41-50	<=45 (Young patient)	Male	Tongue	Yes	Well	8	4-8 (Grade I, Good)	Biopsy	NA	NA	NA	NA	NA	NA	NA	NA
842	2016	2016-2020	31	31-40	<=45 (Young patient)	Female	Palate	Yes	Well	NA	NA	Biopsy	NA	NA	NA	NA	NA	NA	Negative	NA
843	2016	2016-2020	49	41-50	>45 (Old patient)	Male	Mouth Non-specific	Yes	Well	NA	NA	Biopsy	NA	NA	NA	NA	NA	NA	NA	NA
844	2016	2016-2020	68	61-70	>45 (Old patient)	Female	Tongue	No	NA	11	9-12 (Grade II, Moderate)	Biopsy	NA	NA	NA	NA	NA	NA	NA	NA
845	2016	2016-2020	64	61-70	>45 (Old patient)	Female	Tongue	Yes	Well	8	4-8 (Grade I, Good)	Biopsy	NA	NA	NA	NA	NA	NA	NA	NA
846	2016	2016-2020	61	61-70	>45 (Old patient)	Female	Mouth Non-specific	Yes	Moderate	7	4-8 (Grade I, Good)	Biopsy	NA	NA	NA	NA	NA	NA	NA	NA
847	2016	2016-2020	26	21-30	<=45 (Young patient)	Male	Tongue	No	NA	10	9-12 (Grade II, Moderate)	Biopsy	NA	NA	NA	NA	NA	NA	NA	NA
848	2016	2016-2020	40	31-40	<=45 (Young patient)	Female	Tongue	Yes	NA	10	9-12 (Grade II, Moderate)	Biopsy	NA	NA	NA	NA	NA	NA	NA	NA
849	2016	2016-2020	45	41-50	<=45 (Young patient)	Male	Tongue	Yes	NA	9	9-12 (Grade II, Moderate)	Biopsy	NA	NA	NA	NA	NA	NA	NA	NA
850	2016	2016-2020	45	41-50	<=45 (Young patient)	Male	Gingiva	Yes	NA	6	4-8 (Grade I, Good)	Biopsy	NA	NA	NA	NA	NA	NA	NA	NA
851	2015	2011-2015	31	31-40	<=45 (Young patient)	Female	Palate	Yes	Well	NA	NA	Biopsy	NA	NA	NA	NA	NA	NA	NA	NA
852	2015	2011-2015	42	41-50	<=45 (Young patient)	Male	Tongue	Yes	NA	10	9-12 (Grade II, Moderate)	Biopsy	NA	NA	NA	NA	NA	NA	NA	NA
853	2015	2011-2015	61	61-70	>45 (Old patient)	Male	Mouth Non-specific	Yes	Well	NA	NA	Biopsy	NA	NA	NA	NA	NA	NA	NA	NA
854	2015	2011-2015	49	41-50	>45 (Old patient)	Female	Tongue	No	NA	8	4-8 (Grade I, Good)	Biopsy	NA	NA	NA	NA	NA	NA	NA	NA
855	2015	2011-2015	43	41-50	<=45 (Young patient)	Male	Tongue	Yes	NA	9	9-12 (Grade II, Moderate)	Biopsy	NA	NA	NA	NA	NA	NA	NA	NA
856	2015	2011-2015	55	51-60	>45 (Old patient)	Female	Mouth Non-specific	Yes	Moderate	8	4-8 (Grade I, Good)	Biopsy	NA	NA	NA	NA	NA	NA	Negative	NA
857	2015	2011-2015	50	41-50	>45 (Old patient)	Female	Tongue	Yes	Well	8	4-8 (Grade I, Good)	Biopsy	NA	NA	NA	NA	NA	NA	NA	NA
858	2015	2011-2015	63	61-70	>45 (Old patient)	Female	Tongue	No	NA	10	9-12 (Grade II, Moderate)	Biopsy	NA	NA	NA	NA	NA	NA	NA	NA
859	2015	2011-2015	74	71-80	>45 (Old patient)	Male	Tongue	No	NA	10	9-12 (Grade II, Moderate)	Biopsy	NA	NA	NA	NA	NA	NA	NA	NA
860	2015	2011-2015	49	41-50	>45 (Old patient)	Male	Tongue	Yes	NA	8	4-8 (Grade I, Good)	Biopsy	NA	NA	NA	NA	NA	NA	NA	NA
861	2015	2011-2015	47	41-50	>45 (Old patient)	Female	Tongue	No	NA	10	9-12 (Grade II, Moderate)	Biopsy	NA	NA	NA	NA	NA	NA	Positive	NA
862	2015	2011-2015	30	21-30	<=45 (Young patient)	Female	Tongue	Yes	Well	8	4-8 (Grade I, Good)	Biopsy	NA	NA	NA	NA	NA	NA	NA	NA
863	2015	2011-2015	64	61-70	>45 (Old patient)	Male	Tongue	Yes	NA	8	4-8 (Grade I, Good)	Biopsy	NA	NA	NA	NA	NA	NA	NA	NA
864	2015	2011-2015	76	71-80	>45 (Old patient)	Female	Gingiva	Yes	NA	8	4-8 (Grade I, Good)	Biopsy	NA	NA	NA	NA	NA	NA	Positive	NA
865	2015	2011-2015	62	61-70	>45 (Old patient)	Female	Tongue	No	NA	8	4-8 (Grade I, Good)	Biopsy	NA	NA	NA	NA	NA	NA	Positive	NA
866	2015	2011-2015	45	41-50	<=45 (Young patient)	Female	Mouth Non-specific	Non-specific	Poor	NA	NA	Biopsy	NA	NA	NA	NA	NA	NA	NA	NA
867	2015	2011-2015	59	51-60	>45 (Old patient)	Female	Tongue	Yes	NA	7	4-8 (Grade I, Good)	Biopsy	NA	NA	NA	NA	NA	NA	NA	NA
868	2015	2011-2015	51	51-60	>45 (Old patient)	Female	Tongue	No	NA	10	9-12 (Grade II, Moderate)	Biopsy	NA	NA	NA	NA	NA	NA	NA	NA
869	2015	2011-2015	34	31-40	<=45 (Young patient)	Male	Palate	Yes	NA	9	9-12 (Grade II, Moderate)	Biopsy	NA	NA	NA	NA	NA	NA	NA	NA
870	2015	2011-2015	54	51-60	>45 (Old patient)	Male	Tongue	No	Well	9	9-12 (Grade II, Moderate)	Biopsy	NA	NA	NA	NA	NA	NA	NA	NA
871	2014	2011-2015	48	41-50	>45 (Old patient)	Male	Tongue	Yes	NA	7	4-8 (Grade I, Good)	Biopsy	NA	NA	NA	NA	NA	NA	NA	NA
872	2014	2011-2015	47	41-50	>45 (Old patient)	Female	Mouth Non-specific	Yes	NA	10	9-12 (Grade II, Moderate)	Biopsy	NA	NA	NA	NA	NA	NA	NA	NA
873	2014	2011-2015	36	31-40	<=45 (Young patient)	Female	Palate	Yes	Well	7	4-8 (Grade I, Good)	Biopsy	NA	NA	NA	NA	NA	NA	NA	NA
874	2014	2011-2015	57	51-60	>45 (Old patient)	Female	Tongue	Yes	NA	9	9-12 (Grade II, Moderate)	Biopsy	NA	NA	NA	NA	NA	NA	NA	NA
875	2014	2011-2015	62	61-70	>45 (Old patient)	Male	Lip	No	NA	13	13-16 (Grade III, Poor)	Biopsy	NA	NA	NA	NA	NA	NA	NA	NA
876	2014	2011-2015	46	41-50	>45 (Old patient)	Male	Tongue	Yes	NA	NA	NA	Biopsy	NA	NA	NA	NA	NA	NA	NA	NA
877	2014	2011-2015	63	61-70	>45 (Old patient)	Male	Tongue	Yes	Moderate	9	9-12 (Grade II, Moderate)	Biopsy	NA	NA	NA	NA	NA	NA	NA	NA
878	2014	2011-2015	59	51-60	>45 (Old patient)	Male	Mouth Non-specific	Yes	Poor	8	4-8 (Grade I, Good)	Biopsy	NA	NA	NA	NA	NA	NA	NA	NA
879	2014	2011-2015	59	51-60	>45 (Old patient)	Male	Lip	Yes	NA	6	4-8 (Grade I, Good)	Biopsy	NA	NA	NA	NA	NA	NA	NA	NA
880	2014	2011-2015	38	31-40	<=45 (Young patient)	Female	Tongue	Yes	Well	7	4-8 (Grade I, Good)	Biopsy	NA	NA	NA	NA	NA	NA	NA	NA
881	2014	2011-2015	51	51-60	>45 (Old patient)	Male	Tongue	Yes	Moderate	5	4-8 (Grade I, Good)	Biopsy	NA	NA	NA	NA	NA	NA	NA	NA
882	2014	2011-2015	73	71-80	>45 (Old patient)	Male	Tongue	Yes	NA	7	4-8 (Grade I, Good)	Biopsy	NA	NA	NA	NA	NA	NA	NA	NA
883	2014	2011-2015	66	61-70	>45 (Old patient)	Male	Tongue	Non-specific	NA	10	9-12 (Grade II, Moderate)	Biopsy	NA	NA	NA	NA	NA	NA	NA	NA
884	2014	2011-2015	56	51-60	>45 (Old patient)	Male	Palate	Yes	NA	8	4-8 (Grade I, Good)	Biopsy	NA	NA	NA	NA	NA	NA	NA	NA
885	2014	2011-2015	47	41-50	>45 (Old patient)	Female	Tongue	Yes	NA	5	4-8 (Grade I, Good)	Biopsy	NA	NA	NA	NA	NA	NA	NA	NA
886	2014	2011-2015	51	51-60	>45 (Old patient)	Female	Mouth Non-specific	Yes	Well	12	9-12 (Grade II, Moderate)	Biopsy	NA	NA	NA	NA	NA	NA	NA	NA
887	2014	2011-2015	76	71-80	>45 (Old patient)	Male	Gingiva	Yes	NA	12	9-12 (Grade II, Moderate)	Biopsy	NA	NA	NA	NA	NA	NA	NA	NA
888	2014	2011-2015	53	51-60	>45 (Old patient)	Female	Tongue	Yes	NA	10	9-12 (Grade II, Moderate)	Biopsy	NA	NA	NA	NA	NA	NA	NA	NA
889	2014	2011-2015	38	31-40	<=45 (Young patient)	Male	Tongue	Yes	Well	4	4-8 (Grade I, Good)	Biopsy	NA	NA	NA	NA	NA	NA	NA	NA
890	2014	2011-2015	39	31-40	<=45 (Young patient)	Male	Tongue	Yes	Poor	13	13-16 (Grade III, Poor)	Biopsy	NA	NA	NA	NA	NA	NA	NA	NA
891	2014	2011-2015	51	51-60	>45 (Old patient)	Female	Tongue	Yes	NA	10	9-12 (Grade II, Moderate)	Biopsy	NA	NA	NA	NA	NA	NA	NA	NA
892	2014	2011-2015	61	61-70	>45 (Old patient)	Male	Tongue	Yes	Well	10	9-12 (Grade II, Moderate)	Biopsy	NA	NA	NA	NA	NA	NA	NA	NA
893	2014	2011-2015	48	41-50	>45 (Old patient)	Male	Tongue	Non-specific	NA	13	13-16 (Grade III, Poor)	Biopsy	NA	NA	NA	NA	NA	NA	NA	NA
894	2014	2011-2015	28	21-30	<=45 (Young patient)	Male	Tongue	Yes	Poor	13	13-16 (Grade III, Poor)	Biopsy	NA	NA	NA	NA	NA	NA	NA	NA
895	2014	2011-2015	75	71-80	>45 (Old patient)	Male	Tongue	Yes	Moderate	7	4-8 (Grade I, Good)	Biopsy	NA	NA	NA	NA	NA	NA	Positive	NA
896	2014	2011-2015	33	31-40	<=45 (Young patient)	Male	Tongue	Yes	NA	7	4-8 (Grade I, Good)	Biopsy	NA	NA	NA	NA	NA	NA	NA	NA
897	2014	2011-2015	56	51-60	>45 (Old patient)	Female	Tongue	Yes	NA	12	9-12 (Grade II, Moderate)	Biopsy	NA	NA	NA	NA	NA	NA	NA	NA
898	2014	2011-2015	52	51-60	>45 (Old patient)	Female	Tongue	Yes	Well	NA	NA	Biopsy	NA	NA	NA	NA	NA	NA	NA	NA
899	2014	2011-2015	35	31-40	<=45 (Young patient)	Female	Mouth Non-specific	Yes	NA	11	9-12 (Grade II, Moderate)	Biopsy	NA	NA	NA	NA	NA	NA	NA	NA
900	2014	2011-2015	61	61-70	>45 (Old patient)	Female	Lip	Yes	Moderate	9	9-12 (Grade II, Moderate)	Biopsy	NA	NA	NA	NA	NA	NA	NA	NA
901	2014	2011-2015	63	61-70	>45 (Old patient)	Male	Mouth Non-specific	Non-specific	Moderate	NA	NA	Biopsy	NA	NA	NA	NA	NA	NA	NA	NA
902	2014	2011-2015	60	51-60	>45 (Old patient)	Male	Tongue	Yes	Well	13	13-16 (Grade III, Poor)	Biopsy	NA	NA	NA	NA	NA	NA	NA	NA
903	2014	2011-2015	38	31-40	<=45 (Young patient)	Female	Tongue	No	NA	8	4-8 (Grade I, Good)	Biopsy	NA	NA	NA	NA	NA	NA	NA	NA
904	2013	2011-2015	59	51-60	>45 (Old patient)	Female	Tongue	Yes	NA	6	4-8 (Grade I, Good)	Biopsy	NA	NA	NA	NA	NA	NA	NA	NA
905	2013	2011-2015	65	61-70	>45 (Old patient)	Male	Tongue	Yes	NA	6	4-8 (Grade I, Good)	Biopsy	NA	NA	NA	NA	NA	NA	NA	NA
906	2013	2011-2015	67	61-70	>45 (Old patient)	Male	Palate	Yes	Moderate	NA	NA	Biopsy	NA	NA	NA	NA	NA	NA	NA	NA
907	2013	2011-2015	71	71-80	>45 (Old patient)	Female	Tongue	Yes	NA	6	4-8 (Grade I, Good)	Biopsy	NA	NA	NA	NA	NA	NA	NA	NA
908	2013	2011-2015	54	51-60	>45 (Old patient)	Male	Mouth Non-specific	Yes	NA	7	4-8 (Grade I, Good)	Biopsy	NA	NA	NA	NA	NA	NA	NA	NA
909	2013	2011-2015	47	41-50	>45 (Old patient)	Male	Tongue	Yes	NA	9	9-12 (Grade II, Moderate)	Biopsy	NA	NA	NA	NA	NA	NA	NA	NA
910	2013	2011-2015	58	51-60	>45 (Old patient)	Female	Tongue	No	NA	10	9-12 (Grade II, Moderate)	Biopsy	NA	NA	NA	NA	NA	NA	NA	NA
911	2013	2011-2015	29	21-30	<=45 (Young patient)	Female	Tongue	Yes	NA	7	4-8 (Grade I, Good)	Biopsy	NA	NA	NA	NA	NA	NA	NA	NA
912	2013	2011-2015	68	61-70	>45 (Old patient)	Male	Mouth Non-specific	Yes	Well	9	9-12 (Grade II, Moderate)	Biopsy	NA	NA	NA	NA	NA	NA	NA	NA
913	2013	2011-2015	56	51-60	>45 (Old patient)	Female	Tongue	Yes	NA	11	9-12 (Grade II, Moderate)	Biopsy	NA	NA	NA	NA	NA	NA	NA	NA
914	2013	2011-2015	52	51-60	>45 (Old patient)	Female	Mouth Non-specific	Non-specific	NA	12	9-12 (Grade II, Moderate)	Biopsy	NA	NA	NA	NA	NA	NA	NA	NA
915	2013	2011-2015	74	71-80	>45 (Old patient)	Male	Mouth Non-specific	Yes	Well	5	4-8 (Grade I, Good)	Biopsy	NA	NA	NA	NA	NA	NA	NA	NA
916	2013	2011-2015	49	41-50	>45 (Old patient)	Female	Tongue	No	Well	8	4-8 (Grade I, Good)	Biopsy	NA	NA	NA	NA	NA	NA	NA	NA
917	2013	2011-2015	52	51-60	>45 (Old patient)	Male	Tongue	Yes	NA	9	9-12 (Grade II, Moderate)	Biopsy	NA	NA	NA	NA	NA	NA	NA	NA
918	2013	2011-2015	74	71-80	>45 (Old patient)	Male	Tongue	Yes	NA	7	4-8 (Grade I, Good)	Biopsy	NA	NA	NA	NA	NA	NA	NA	NA
919	2013	2011-2015	44	41-50	<=45 (Young patient)	Male	Tongue	Yes	NA	7	4-8 (Grade I, Good)	Biopsy	NA	NA	NA	NA	NA	NA	NA	NA
920	2013	2011-2015	50	41-50	>45 (Old patient)	Female	Tongue	No	NA	13	13-16 (Grade III, Poor)	Biopsy	NA	NA	NA	NA	NA	NA	NA	NA
921	2013	2011-2015	57	51-60	>45 (Old patient)	Male	Tongue	Yes	NA	8	4-8 (Grade I, Good)	Biopsy	NA	NA	NA	NA	NA	NA	NA	NA
922	2013	2011-2015	41	41-50	<=45 (Young patient)	Male	Mouth Non-specific	Yes	NA	5	4-8 (Grade I, Good)	Biopsy	NA	NA	NA	NA	NA	NA	NA	NA
923	2013	2011-2015	70	61-70	>45 (Old patient)	Male	Palate	No	NA	12	9-12 (Grade II, Moderate)	Biopsy	NA	NA	NA	NA	NA	NA	NA	NA
924	2013	2011-2015	52	51-60	>45 (Old patient)	Male	Tongue	Yes	NA	10	9-12 (Grade II, Moderate)	Biopsy	NA	NA	NA	NA	NA	NA	NA	NA
925	2013	2011-2015	28	21-30	<=45 (Young patient)	Female	Tongue	Yes	NA	5	4-8 (Grade I, Good)	Biopsy	NA	NA	NA	NA	NA	NA	NA	NA
926	2013	2011-2015	59	51-60	>45 (Old patient)	Male	Tongue	Yes	Poor	12	9-12 (Grade II, Moderate)	Biopsy	NA	NA	NA	NA	NA	NA	NA	NA
927	2012	2011-2015	50	41-50	>45 (Old patient)	Male	Mouth Non-specific	Non-specific	Moderate	NA	NA	Biopsy	NA	NA	NA	NA	NA	NA	NA	NA
928	2012	2011-2015	62	61-70	>45 (Old patient)	Male	Mouth Non-specific	Yes	Well	NA	NA	Biopsy	NA	NA	NA	NA	NA	NA	NA	NA
929	2012	2011-2015	58	51-60	>45 (Old patient)	Male	Gingiva	Yes	Well	5	4-8 (Grade I, Good)	Biopsy	NA	NA	NA	NA	NA	NA	NA	NA
930	2012	2011-2015	70	61-70	>45 (Old patient)	Male	Tongue	Yes	NA	11	9-12 (Grade II, Moderate)	Biopsy	NA	NA	NA	NA	NA	NA	NA	NA
931	2012	2011-2015	33	31-40	<=45 (Young patient)	Male	Gingiva	No	NA	13	13-16 (Grade III, Poor)	Biopsy	NA	NA	NA	NA	NA	NA	NA	NA
932	2012	2011-2015	30	21-30	<=45 (Young patient)	Male	Tongue	Yes	Well	7	4-8 (Grade I, Good)	Biopsy	NA	NA	NA	NA	NA	NA	NA	NA
933	2012	2011-2015	41	41-50	<=45 (Young patient)	Female	Tongue	No	NA	12	9-12 (Grade II, Moderate)	Biopsy	NA	NA	NA	NA	NA	NA	NA	NA
934	2012	2011-2015	52	51-60	>45 (Old patient)	Female	Gingiva	Yes	Well	NA	NA	Biopsy	NA	NA	NA	NA	NA	NA	NA	NA
935	2012	2011-2015	61	61-70	>45 (Old patient)	Male	Tongue	No	NA	NA	NA	Biopsy	NA	NA	NA	NA	NA	NA	NA	NA
936	2012	2011-2015	22	21-30	<=45 (Young patient)	Male	Palate	Yes	Moderate	NA	NA	Biopsy	NA	NA	NA	NA	NA	NA	NA	NA
937	2012	2011-2015	50	41-50	>45 (Old patient)	Female	Tongue	Yes	NA	10	9-12 (Grade II, Moderate)	Biopsy	NA	NA	NA	NA	NA	NA	NA	NA
938	2012	2011-2015	49	41-50	>45 (Old patient)	Male	Tongue	Yes	Well	7	4-8 (Grade I, Good)	Biopsy	NA	NA	NA	NA	NA	NA	NA	NA
939	2012	2011-2015	53	51-60	>45 (Old patient)	Female	Tongue	Yes	NA	8	4-8 (Grade I, Good)	Biopsy	NA	NA	NA	NA	NA	NA	NA	NA
940	2012	2011-2015	41	41-50	<=45 (Young patient)	Female	Tongue	Non-specific	NA	13	13-16 (Grade III, Poor)	Biopsy	NA	NA	NA	NA	NA	NA	NA	NA
941	2012	2011-2015	52	51-60	>45 (Old patient)	Female	Mouth Non-specific	Yes	Well	7	4-8 (Grade I, Good)	Biopsy	NA	NA	NA	NA	NA	NA	NA	NA
942	2012	2011-2015	54	51-60	>45 (Old patient)	Male	Palate	Yes	Well	7	4-8 (Grade I, Good)	Biopsy	NA	NA	NA	NA	NA	NA	NA	NA
943	2012	2011-2015	47	41-50	>45 (Old patient)	Female	FOM	Yes	NA	11	9-12 (Grade II, Moderate)	Biopsy	NA	NA	NA	NA	NA	NA	NA	NA
944	2012	2011-2015	62	61-70	>45 (Old patient)	Female	Mouth Non-specific	Yes	Moderate	12	9-12 (Grade II, Moderate)	Biopsy	NA	NA	NA	NA	NA	NA	NA	NA
945	2012	2011-2015	52	51-60	>45 (Old patient)	Female	Tongue	Yes	Moderate	7	4-8 (Grade I, Good)	Biopsy	NA	NA	NA	NA	NA	NA	NA	NA
946	2012	2011-2015	33	31-40	<=45 (Young patient)	Male	Tongue	Yes	Well	7	4-8 (Grade I, Good)	Biopsy	NA	NA	NA	NA	NA	NA	NA	NA
947	2012	2011-2015	48	41-50	>45 (Old patient)	Female	Tongue	Non-specific	NA	13	13-16 (Grade III, Poor)	Biopsy	NA	NA	NA	NA	NA	NA	NA	NA
948	2012	2011-2015	38	31-40	<=45 (Young patient)	Male	Tongue	Yes	NA	4	4-8 (Grade I, Good)	Biopsy	NA	NA	NA	NA	NA	NA	NA	NA
949	2012	2011-2015	57	51-60	>45 (Old patient)	Male	Palate	Yes	Well	6	4-8 (Grade I, Good)	Biopsy	NA	NA	NA	NA	NA	NA	Negative	NA
950	2012	2011-2015	70	61-70	>45 (Old patient)	Female	Tongue	Yes	Moderate	7	4-8 (Grade I, Good)	Biopsy	NA	NA	NA	NA	NA	NA	NA	NA
951	2012	2011-2015	67	61-70	>45 (Old patient)	Female	Mouth Non-specific	Yes	Moderate	8	4-8 (Grade I, Good)	Biopsy	NA	NA	NA	NA	NA	NA	Negative	NA
952	2012	2011-2015	36	31-40	<=45 (Young patient)	Female	Palate	Yes	Moderate	8	4-8 (Grade I, Good)	Biopsy	NA	NA	NA	NA	NA	NA	Negative	NA
953	2012	2011-2015	53	51-60	>45 (Old patient)	Male	Tongue	Yes	Moderate	8	4-8 (Grade I, Good)	Biopsy	NA	NA	NA	NA	NA	NA	Negative	NA
954	2012	2011-2015	47	41-50	>45 (Old patient)	Female	Tongue	Yes	Moderate	8	4-8 (Grade I, Good)	Biopsy	NA	NA	NA	NA	NA	NA	NA	NA
955	2012	2011-2015	32	31-40	<=45 (Young patient)	Female	Tongue	Yes	Moderate	8	4-8 (Grade I, Good)	Biopsy	NA	NA	NA	NA	NA	NA	Positive	NA
956	2012	2011-2015	49	41-50	>45 (Old patient)	Male	FOM	Yes	NA	8	4-8 (Grade I, Good)	Biopsy	NA	NA	NA	NA	NA	NA	NA	NA
957	2012	2011-2015	56	51-60	>45 (Old patient)	Female	Palate	Yes	Well	8	4-8 (Grade I, Good)	Biopsy	NA	NA	NA	NA	NA	NA	NA	NA
958	2012	2011-2015	38	31-40	<=45 (Young patient)	Female	Mouth Non-specific	Yes	NA	9	9-12 (Grade II, Moderate)	Biopsy	NA	NA	NA	NA	NA	NA	NA	NA
959	2012	2011-2015	42	41-50	<=45 (Young patient)	Female	Tongue	No	NA	13	13-16 (Grade III, Poor)	Biopsy	NA	NA	NA	NA	NA	NA	NA	NA
960	2011	2011-2015	49	41-50	>45 (Old patient)	Male	Mouth Non-specific	Yes	Moderate	10	9-12 (Grade II, Moderate)	Biopsy	NA	NA	NA	NA	NA	NA	NA	NA
961	2011	2011-2015	76	71-80	>45 (Old patient)	Male	Tongue	Yes	Well	NA	NA	Biopsy	NA	NA	NA	NA	NA	NA	NA	NA
962	2011	2011-2015	39	31-40	<=45 (Young patient)	Male	FOM	Yes	Well	7	4-8 (Grade I, Good)	Biopsy	NA	NA	NA	NA	NA	NA	NA	NA
963	2011	2011-2015	33	31-40	<=45 (Young patient)	Male	Tongue	Yes	Moderate	NA	NA	Biopsy	NA	NA	NA	NA	NA	NA	NA	NA
964	2011	2011-2015	74	71-80	>45 (Old patient)	Male	Tongue	No	Well	13	13-16 (Grade III, Poor)	Biopsy	NA	NA	NA	NA	NA	NA	Negative	NA
965	2011	2011-2015	31	31-40	<=45 (Young patient)	Male	Tongue	Yes	Well	7	4-8 (Grade I, Good)	Biopsy	NA	NA	NA	NA	NA	NA	NA	NA
966	2011	2011-2015	27	21-30	<=45 (Young patient)	Female	Tongue	Yes	Well	8	4-8 (Grade I, Good)	Biopsy	NA	NA	NA	NA	NA	NA	NA	NA
967	2011	2011-2015	60	51-60	>45 (Old patient)	Female	Tongue	Yes	Well	5	4-8 (Grade I, Good)	Biopsy	NA	NA	NA	NA	NA	NA	NA	NA
968	2011	2011-2015	57	51-60	>45 (Old patient)	Male	Mouth Non-specific	No	Poor	8	4-8 (Grade I, Good)	Biopsy	NA	NA	NA	NA	NA	NA	Negative	NA
969	2011	2011-2015	43	41-50	<=45 (Young patient)	Male	Palate	Non-specific	Moderate	NA	NA	Biopsy	NA	NA	NA	NA	NA	NA	NA	NA
970	2011	2011-2015	53	51-60	>45 (Old patient)	Female	Tongue	Yes	Well	7	4-8 (Grade I, Good)	Biopsy	NA	NA	NA	NA	NA	NA	NA	NA
971	2011	2011-2015	73	71-80	>45 (Old patient)	Male	Tongue	Yes	NA	7	4-8 (Grade I, Good)	Biopsy	NA	NA	NA	NA	NA	NA	NA	NA
972	2011	2011-2015	38	31-40	<=45 (Young patient)	Female	Tongue	Yes	Moderate	7	4-8 (Grade I, Good)	Biopsy	NA	NA	NA	NA	NA	NA	NA	NA
973	2011	2011-2015	56	51-60	>45 (Old patient)	Male	Tongue	Yes	NA	13	13-16 (Grade III, Poor)	Biopsy	NA	NA	NA	NA	NA	NA	NA	NA
974	2011	2011-2015	42	41-50	<=45 (Young patient)	Male	Tongue	Yes	NA	7	4-8 (Grade I, Good)	Biopsy	NA	NA	NA	NA	NA	NA	NA	NA
975	2011	2011-2015	60	51-60	>45 (Old patient)	Male	Tongue	Yes	Well	7	4-8 (Grade I, Good)	Biopsy	NA	NA	NA	NA	NA	NA	NA	NA
976	2011	2011-2015	21	21-30	<=45 (Young patient)	Male	Tongue	Yes	Well	11	9-12 (Grade II, Moderate)	Biopsy	NA	NA	NA	NA	NA	NA	NA	NA
977	2011	2011-2015	43	41-50	<=45 (Young patient)	Male	Mouth Non-specific	Yes	Moderate	7	4-8 (Grade I, Good)	Biopsy	NA	NA	NA	NA	NA	NA	NA	NA
978	2011	2011-2015	72	71-80	>45 (Old patient)	Female	Mouth Non-specific	Yes	Well	7	4-8 (Grade I, Good)	Biopsy	NA	NA	NA	NA	NA	NA	NA	NA
979	2011	2011-2015	56	51-60	>45 (Old patient)	Male	Palate	No	Well	NA	NA	Biopsy	NA	NA	NA	NA	NA	NA	NA	NA
980	2011	2011-2015	24	21-30	<=45 (Young patient)	Male	Buccal Mucosa	No	Poor	NA	NA	Biopsy	NA	NA	NA	NA	NA	NA	NA	NA
981	2011	2011-2015	70	61-70	>45 (Old patient)	Male	Tongue	Yes	Poor	NA	NA	Biopsy	NA	NA	NA	NA	NA	NA	NA	NA
982	2011	2011-2015	30	21-30	<=45 (Young patient)	Female	Tongue	Yes	NA	5	4-8 (Grade I, Good)	Biopsy	NA	NA	NA	NA	NA	NA	NA	NA
983	2011	2011-2015	60	51-60	>45 (Old patient)	Female	Tongue	Yes	Well	13	13-16 (Grade III, Poor)	Biopsy	NA	NA	NA	NA	NA	NA	NA	NA
984	2011	2011-2015	74	71-80	>45 (Old patient)	Female	Tongue	Yes	Poor	NA	NA	Biopsy	NA	NA	NA	NA	NA	NA	NA	NA
985	2011	2011-2015	50	41-50	>45 (Old patient)	Male	Tongue	Yes	Moderate	NA	NA	Biopsy	NA	NA	NA	NA	NA	NA	NA	NA
986	2011	2011-2015	53	51-60	>45 (Old patient)	Male	Mouth Non-specific	No	Poor	NA	NA	Biopsy	NA	NA	NA	NA	NA	NA	NA	NA
987	2011	2011-2015	69	61-70	>45 (Old patient)	Male	Tongue	Yes	Well	NA	NA	Biopsy	NA	NA	NA	NA	NA	NA	NA	NA
988	2011	2011-2015	28	21-30	<=45 (Young patient)	Male	Tongue	Yes	Well	8	4-8 (Grade I, Good)	Biopsy	NA	NA	NA	NA	NA	NA	Negative	NA
989	2011	2011-2015	47	41-50	>45 (Old patient)	Female	Tongue	Yes	Moderate	8	4-8 (Grade I, Good)	Biopsy	NA	NA	NA	NA	NA	NA	Negative	NA
990	2011	2011-2015	43	41-50	<=45 (Young patient)	Female	Tongue	Yes	Well	NA	NA	Biopsy	NA	NA	NA	NA	NA	NA	NA	NA
991	2011	2011-2015	56	51-60	>45 (Old patient)	Male	Mouth Non-specific	Yes	Moderate	NA	NA	Biopsy	NA	NA	NA	NA	NA	NA	NA	NA
992	2011	2011-2015	45	41-50	<=45 (Young patient)	Female	Tongue	Yes	Moderate	NA	NA	Biopsy	NA	NA	NA	NA	NA	NA	NA	NA
993	2011	2011-2015	61	61-70	>45 (Old patient)	Male	Mouth Non-specific	Yes	NA	8	4-8 (Grade I, Good)	Biopsy	NA	NA	NA	NA	NA	NA	Positive	NA
994	2011	2011-2015	52	51-60	>45 (Old patient)	Male	Tongue	Yes	Well	NA	NA	Biopsy	NA	NA	NA	NA	NA	NA	NA	NA
995	2011	2011-2015	58	51-60	>45 (Old patient)	Male	Mouth Non-specific	Non-specific	Moderate	NA	NA	Biopsy	NA	NA	NA	NA	NA	NA	NA	NA
996	2011	2011-2015	53	51-60	>45 (Old patient)	Female	Tongue	Yes	Well	NA	NA	Biopsy	NA	NA	NA	NA	NA	NA	NA	NA
997	2011	2011-2015	42	41-50	<=45 (Young patient)	Male	Tongue	Yes	NA	NA	NA	Biopsy	NA	NA	NA	NA	NA	NA	NA	NA
998	2011	2011-2015	28	21-30	<=45 (Young patient)	Male	Tongue	Yes	Moderate	NA	NA	Biopsy	NA	NA	NA	NA	NA	NA	NA	NA
999	2011	2011-2015	49	41-50	>45 (Old patient)	Female	Tongue	Non-specific	Moderate	NA	NA	Biopsy	NA	NA	NA	NA	NA	NA	NA	NA
1000	2011	2011-2015	68	61-70	>45 (Old patient)	Female	Mouth Non-specific	Yes	Moderate	NA	NA	Biopsy	NA	NA	NA	NA	NA	NA	NA	NA
1001	2011	2011-2015	31	31-40	<=45 (Young patient)	Female	Tongue	Yes	NA	NA	NA	Biopsy	NA	NA	NA	NA	NA	NA	NA	NA
1002	2001	2001-2005	45	41-50	<=45 (Young patient)	Male	Tongue	Yes	NA	NA	NA	Biopsy	NA	NA	NA	NA	NA	NA	NA	NA
1003	2001	2001-2005	38	31-40	<=45 (Young patient)	Male	Mouth Non-specific	No	Tidak Berdiferensiasi	NA	NA	Biopsy	NA	NA	NA	NA	NA	NA	NA	NA
1004	2001	2001-2005	65	61-70	>45 (Old patient)	Male	Tongue	Yes	NA	NA	NA	Biopsy	NA	NA	NA	NA	NA	NA	NA	NA
1005	2001	2001-2005	51	51-60	>45 (Old patient)	Male	Mouth Non-specific	Non-specific	Moderate	NA	NA	Biopsy	NA	NA	NA	NA	NA	NA	NA	NA
1006	2001	2001-2005	73	71-80	>45 (Old patient)	Female	Tongue	Yes	Well	NA	NA	Biopsy	NA	NA	NA	NA	NA	NA	NA	NA
1007	2001	2001-2005	31	31-40	<=45 (Young patient)	Male	Palate	Non-specific	NA	NA	NA	Biopsy	NA	NA	NA	NA	NA	NA	NA	NA
1008	2001	2001-2005	36	31-40	<=45 (Young patient)	Male	Tongue	Yes	Moderate	NA	NA	Biopsy	NA	NA	NA	NA	NA	NA	NA	NA
1009	2001	2001-2005	26	21-30	<=45 (Young patient)	Female	Tongue	Yes	NA	NA	NA	Biopsy	NA	NA	NA	NA	NA	NA	NA	NA
1010	2001	2001-2005	62	61-70	>45 (Old patient)	Male	Tongue	Yes	Well	NA	NA	Biopsy	NA	NA	NA	NA	NA	NA	NA	NA
1011	2001	2001-2005	69	61-70	>45 (Old patient)	Male	Mouth Non-specific	Yes	Well	NA	NA	Biopsy	NA	NA	NA	NA	NA	NA	NA	NA
1012	2001	2001-2005	38	31-40	<=45 (Young patient)	Male	FOM	Yes	Moderate	NA	NA	Biopsy	NA	NA	NA	NA	NA	NA	NA	NA
1013	2001	2001-2005	56	51-60	>45 (Old patient)	Male	Palate	Yes	Moderate	NA	NA	Biopsy	NA	NA	NA	NA	NA	NA	NA	NA
1014	2001	2001-2005	60	51-60	>45 (Old patient)	Female	Palate	Non-specific	Well	NA	NA	Biopsy	NA	NA	NA	NA	NA	NA	NA	NA
1015	2001	2001-2005	27	21-30	<=45 (Young patient)	Female	Tongue	Yes	Well	NA	NA	Biopsy	NA	NA	NA	NA	NA	NA	NA	NA
1016	2001	2001-2005	42	41-50	<=45 (Young patient)	Female	FOM	No	Poor	NA	NA	Biopsy	NA	NA	NA	NA	NA	NA	NA	NA
1017	2001	2001-2005	60	51-60	>45 (Old patient)	Male	Tongue	Yes	NA	NA	NA	Biopsy	NA	NA	NA	NA	NA	NA	NA	NA
1018	2001	2001-2005	47	41-50	>45 (Old patient)	Female	Palate	Yes	Well	NA	NA	Biopsy	NA	NA	NA	NA	NA	NA	NA	NA
1019	2001	2001-2005	42	41-50	<=45 (Young patient)	Male	Palate	No	Well	NA	NA	Biopsy	NA	NA	NA	NA	NA	NA	NA	NA
1020	2001	2001-2005	40	31-40	<=45 (Young patient)	Female	Tongue	Yes	Well	NA	NA	Biopsy	NA	NA	NA	NA	NA	NA	NA	NA
1021	2001	2001-2005	43	41-50	<=45 (Young patient)	Female	Tongue	Yes	NA	NA	NA	Biopsy	NA	NA	NA	NA	NA	NA	NA	NA
1022	2001	2001-2005	18	11-20	<=45 (Young patient)	Female	Mouth Non-specific	Non-specific	NA	NA	NA	Biopsy	NA	NA	NA	NA	NA	NA	NA	NA
1023	2001	2001-2005	45	41-50	<=45 (Young patient)	Female	Tongue	Yes	Well	NA	NA	Biopsy	NA	NA	NA	NA	NA	NA	NA	NA
1024	2001	2001-2005	75	71-80	>45 (Old patient)	Female	Mouth Non-specific	Yes	NA	NA	NA	Biopsy	NA	NA	NA	NA	NA	NA	NA	NA
1025	2001	2001-2005	38	31-40	<=45 (Young patient)	Female	Mouth Non-specific	No	NA	NA	NA	Biopsy	NA	NA	NA	NA	NA	NA	NA	NA
1026	2001	2001-2005	55	51-60	>45 (Old patient)	Female	Tongue	Non-specific	NA	NA	NA	Biopsy	NA	NA	NA	NA	NA	NA	NA	NA
1027	2001	2001-2005	65	61-70	>45 (Old patient)	Female	Tongue	Yes	NA	NA	NA	Biopsy	NA	NA	NA	NA	NA	NA	NA	NA
1028	2001	2001-2005	62	61-70	>45 (Old patient)	Female	Tongue	Yes	Well	NA	NA	Biopsy	NA	NA	NA	NA	NA	NA	NA	NA
1029	2001	2001-2005	33	31-40	<=45 (Young patient)	Female	Mouth Non-specific	Yes	NA	NA	NA	Biopsy	NA	NA	NA	NA	NA	NA	NA	NA
1030	2001	2001-2005	46	41-50	>45 (Old patient)	Male	Mouth Non-specific	Yes	Well	NA	NA	Biopsy	NA	NA	NA	NA	NA	NA	NA	NA
1031	2001	2001-2005	60	51-60	>45 (Old patient)	Female	Tongue	Yes	NA	NA	NA	Biopsy	NA	NA	NA	NA	NA	NA	NA	NA
1032	2001	2001-2005	65	61-70	>45 (Old patient)	Female	Tongue	Yes	NA	NA	NA	Biopsy	NA	NA	NA	NA	NA	NA	NA	NA
1033	2001	2001-2005	55	51-60	>45 (Old patient)	Male	Tongue	Yes	NA	NA	NA	Biopsy	NA	NA	NA	NA	NA	NA	NA	NA
1034	2001	2001-2005	33	31-40	<=45 (Young patient)	Female	Tongue	No	Moderate	NA	NA	Biopsy	NA	NA	NA	NA	NA	NA	NA	NA
1035	2001	2001-2005	65	61-70	>45 (Old patient)	Female	Tongue	Non-specific	NA	NA	NA	Biopsy	NA	NA	NA	NA	NA	NA	NA	NA
1036	2001	2001-2005	63	61-70	>45 (Old patient)	Male	Palate	No	NA	NA	NA	Biopsy	NA	NA	NA	NA	NA	NA	NA	NA
1037	2001	2001-2005	68	61-70	>45 (Old patient)	Male	FOM	No	Moderate	NA	NA	Biopsy	NA	NA	NA	NA	NA	NA	NA	NA
1038	2001	2001-2005	59	51-60	>45 (Old patient)	Male	Palate	No	NA	NA	NA	Biopsy	NA	NA	NA	NA	NA	NA	NA	NA
1039	2010	2006-2010	32	31-40	<=45 (Young patient)	Male	Tongue	Yes	Moderate	NA	NA	Biopsy	NA	NA	NA	NA	NA	NA	NA	NA
1040	2010	2006-2010	78	71-80	>45 (Old patient)	Female	Tongue	Yes	Well	NA	NA	Biopsy	NA	NA	NA	NA	NA	NA	NA	NA
1041	2001	2001-2005	99	>80	>45 (Old patient)	Female	Tongue	Yes	NA	NA	NA	Biopsy	NA	NA	NA	NA	NA	NA	NA	NA
1042	2010	2006-2010	34	31-40	<=45 (Young patient)	Male	Tongue	Non-specific	Poor	NA	NA	Biopsy	NA	NA	NA	NA	NA	NA	NA	NA
1043	2010	2006-2010	55	51-60	>45 (Old patient)	Male	Gingiva	No	Moderate	NA	NA	Biopsy	NA	NA	NA	NA	NA	NA	NA	NA
1044	2010	2006-2010	54	51-60	>45 (Old patient)	Male	Tongue	Yes	Moderate	NA	NA	Biopsy	NA	NA	NA	NA	NA	NA	NA	NA
1045	2010	2006-2010	43	41-50	<=45 (Young patient)	Male	Tongue	Yes	Moderate	NA	NA	Biopsy	NA	NA	NA	NA	NA	NA	NA	NA
1046	2010	2006-2010	29	21-30	<=45 (Young patient)	Female	Tongue	Non-specific	Moderate	NA	NA	Biopsy	NA	NA	NA	NA	NA	NA	NA	NA
1047	2010	2006-2010	35	31-40	<=45 (Young patient)	Female	Tongue	Yes	Moderate	NA	NA	Biopsy	NA	NA	NA	NA	NA	NA	NA	NA
1048	2001	2001-2005	34	31-40	<=45 (Young patient)	Male	Mouth Non-specific	No	NA	NA	NA	Biopsy	NA	NA	NA	NA	NA	NA	NA	NA
1049	2010	2006-2010	39	31-40	<=45 (Young patient)	Male	Tongue	Yes	Well	NA	NA	Biopsy	NA	NA	NA	NA	NA	NA	NA	NA
1050	2010	2006-2010	42	41-50	<=45 (Young patient)	Female	Gingiva	Yes	Well	NA	NA	Biopsy	NA	NA	NA	NA	NA	NA	NA	NA
1051	2010	2006-2010	69	61-70	>45 (Old patient)	Female	Tongue	Yes	Moderate	NA	NA	Biopsy	NA	NA	NA	NA	NA	NA	NA	NA
1052	2010	2006-2010	48	41-50	>45 (Old patient)	Male	Gingiva	Yes	Well	NA	NA	Biopsy	NA	NA	NA	NA	NA	NA	NA	NA
1053	2010	2006-2010	65	61-70	>45 (Old patient)	Female	Tongue	Yes	Moderate	NA	NA	Biopsy	NA	NA	NA	NA	NA	NA	NA	NA
1054	2010	2006-2010	44	41-50	<=45 (Young patient)	Female	Tongue	Yes	Well	NA	NA	Biopsy	NA	NA	NA	NA	NA	NA	NA	NA
1055	2010	2006-2010	64	61-70	>45 (Old patient)	Male	FOM	Yes	Well	NA	NA	Biopsy	NA	NA	NA	NA	NA	NA	NA	NA
1056	2010	2006-2010	68	61-70	>45 (Old patient)	Male	Tongue	No	Moderate	NA	NA	Biopsy	NA	NA	NA	NA	NA	NA	NA	NA
1057	2010	2006-2010	29	21-30	<=45 (Young patient)	Male	Lip	Yes	Well	NA	NA	Biopsy	NA	NA	NA	NA	NA	NA	NA	NA
1058	2010	2006-2010	56	51-60	>45 (Old patient)	Female	Tongue	Yes	Well	NA	NA	Biopsy	NA	NA	NA	NA	NA	NA	NA	NA
1059	2010	2006-2010	32	31-40	<=45 (Young patient)	Male	Tongue	Yes	Moderate	NA	NA	Biopsy	NA	NA	NA	NA	NA	NA	NA	NA
1060	2010	2006-2010	65	61-70	>45 (Old patient)	Male	Tongue	Yes	Well	NA	NA	Biopsy	NA	NA	NA	NA	NA	NA	NA	NA
1061	2010	2006-2010	24	21-30	<=45 (Young patient)	Female	Tongue	Yes	Moderate	NA	NA	Biopsy	NA	NA	NA	NA	NA	NA	NA	NA
1062	2001	2001-2005	48	41-50	>45 (Old patient)	Male	Tongue	Yes	Moderate	NA	NA	Biopsy	NA	NA	NA	NA	NA	NA	NA	NA
1063	2010	2006-2010	53	51-60	>45 (Old patient)	Male	Palate	Yes	Well	7	4-8 (Grade I, Good)	Biopsy	NA	NA	NA	NA	NA	NA	NA	NA
1064	2010	2006-2010	86	>80	>45 (Old patient)	Female	Tongue	Non-specific	Well	NA	NA	Biopsy	NA	NA	NA	NA	NA	NA	NA	NA
1065	2010	2006-2010	69	61-70	>45 (Old patient)	Male	Palate	Yes	Moderate	NA	NA	Biopsy	NA	NA	NA	NA	NA	NA	NA	NA
1066	2010	2006-2010	49	41-50	>45 (Old patient)	Female	Tongue	Non-specific	Moderate	NA	NA	Biopsy	NA	NA	NA	NA	NA	NA	NA	NA
1067	2010	2006-2010	24	21-30	<=45 (Young patient)	Female	Tongue	Yes	NA	NA	NA	Biopsy	NA	NA	NA	NA	NA	NA	NA	NA
1068	2010	2006-2010	34	31-40	<=45 (Young patient)	Female	Tongue	Yes	Well	NA	NA	Biopsy	NA	NA	NA	NA	NA	NA	NA	NA
1069	2010	2006-2010	51	51-60	>45 (Old patient)	Male	Mouth Non-specific	Yes	Moderate	NA	NA	Biopsy	NA	NA	NA	NA	NA	NA	NA	NA
1070	2010	2006-2010	33	31-40	<=45 (Young patient)	Male	Tongue	Yes	Well	NA	NA	Biopsy	NA	NA	NA	NA	NA	NA	NA	NA
1071	2001	2001-2005	52	51-60	>45 (Old patient)	Male	Palate	Yes	Well	NA	NA	Biopsy	NA	NA	NA	NA	NA	NA	NA	NA
1072	2010	2006-2010	42	41-50	<=45 (Young patient)	Female	Mouth Non-specific	Yes	Well	NA	NA	Biopsy	NA	NA	NA	NA	NA	NA	NA	NA
1073	2010	2006-2010	60	51-60	>45 (Old patient)	Male	Tongue	Yes	Well	NA	NA	Biopsy	NA	NA	NA	NA	NA	NA	NA	NA
1074	2010	2006-2010	54	51-60	>45 (Old patient)	Female	Tongue	Yes	Moderate	NA	NA	Biopsy	NA	NA	NA	NA	NA	NA	NA	NA
1075	2001	2001-2005	75	71-80	>45 (Old patient)	Male	Tongue	Yes	Moderate	NA	NA	Biopsy	NA	NA	NA	NA	NA	NA	NA	NA
1076	2010	2006-2010	49	41-50	>45 (Old patient)	Male	Mouth Non-specific	No	Poor	NA	NA	Biopsy	NA	NA	NA	NA	NA	NA	NA	NA
1077	2001	2001-2005	40	31-40	<=45 (Young patient)	Male	Tongue	Yes	NA	NA	NA	Biopsy	NA	NA	NA	NA	NA	NA	NA	NA
1078	2010	2006-2010	69	61-70	>45 (Old patient)	Male	Mouth Non-specific	Yes	Well	NA	NA	Biopsy	NA	NA	NA	NA	NA	NA	NA	NA
1079	2010	2006-2010	30	21-30	<=45 (Young patient)	Female	Tongue	Yes	Moderate	NA	NA	Biopsy	NA	NA	NA	NA	NA	NA	NA	NA
1080	2001	2001-2005	58	51-60	>45 (Old patient)	Female	Tongue	Yes	Poor	NA	NA	Biopsy	NA	NA	NA	NA	NA	NA	NA	NA
1081	2010	2006-2010	45	41-50	<=45 (Young patient)	Male	Tongue	No	Poor	NA	NA	Biopsy	NA	NA	NA	NA	NA	NA	NA	NA
1082	2009	2006-2010	42	41-50	<=45 (Young patient)	Female	Tongue	Yes	Well	NA	NA	Excision	NA	NA	NA	NA	NA	NA	NA	NA
1083	2007	2006-2010	52	51-60	>45 (Old patient)	Male	Tongue	Non-specific	Moderate	NA	NA	Excision	NA	NA	NA	NA	NA	NA	NA	NA
1084	2016	2016-2020	56	51-60	>45 (Old patient)	Male	Palate	No	Moderate	NA	NA	Excision	NA	NA	NA	NA	NA	NA	NA	NA
1085	2016	2016-2020	52	51-60	>45 (Old patient)	Female	Tongue	Non-specific	Moderate	NA	NA	Excision	NA	NA	NA	NA	NA	NA	NA	NA
1086	2015	2011-2015	44	41-50	<=45 (Young patient)	Male	Tongue	Yes	Moderate	12	9-12 (Grade II, Moderate)	Excision	NA	NA	NA	NA	NA	NA	NA	NA
1087	2015	2011-2015	50	41-50	>45 (Old patient)	Male	Tongue	Yes	NA	NA	NA	Excision	NA	NA	NA	NA	NA	NA	NA	NA
1088	2013	2011-2015	40	31-40	<=45 (Young patient)	Female	Tongue	No	NA	9	9-12 (Grade II, Moderate)	Excision	NA	NA	NA	NA	NA	NA	NA	NA
1089	2012	2011-2015	34	31-40	<=45 (Young patient)	Female	Tongue	No	NA	9	9-12 (Grade II, Moderate)	Excision	NA	NA	NA	NA	NA	NA	NA	NA
1090	2011	2011-2015	35	31-40	<=45 (Young patient)	Male	Gingiva	Yes	Well	NA	NA	Excision	NA	NA	NA	NA	NA	NA	NA	NA
1091	2011	2011-2015	74	71-80	>45 (Old patient)	Female	Lip	Yes	Moderate	NA	NA	Excision	NA	NA	NA	NA	NA	NA	NA	NA
1092	2011	2011-2015	50	41-50	>45 (Old patient)	Female	Tongue	Yes	Moderate	7	4-8 (Grade I, Good)	Excision	NA	NA	NA	NA	NA	NA	NA	NA
1093	2010	2006-2010	54	51-60	>45 (Old patient)	Male	Tongue	Yes	Well	NA	NA	Excision	NA	NA	NA	NA	NA	NA	NA	NA

## Sheet: Legends
See our legends on the document entitled: "README__Dataset_OSCC_Indonesian_Projection.txt."
